# Supplementary material for: Update on the Inactivation Procedures for the Vaccine Development Prospects of a New Highly Virulent RGNNV Isolate
Source: MDPI journal article supplement (doi:10.3390/vaccines9121441), 2021-12-07
Supplement: s1 [file s1]

## Supplementary Materials

### Update on the inactivation procedures for the vaccine development prospects of a new highly virulent RGNNV isolate

Alberto Falco <sup>1,\*</sup>, Melissa Bello-Perez <sup>1</sup>, Rocío Díaz-Puertas <sup>1</sup>, Matthew Mold <sup>2</sup> and Mikolaj Adamek

<sup>3</sup>

<sup>1</sup> Institute of Research, Development, and Innovation in Healthcare Biotechnology in Elche (IDiBE), Miguel Hernández University (UMH), 03202 Elche, Spain; [alber.falco@umh.es](mailto:alber.falco@umh.es) (A.F.) [melissa.bello@alu.umh.es](mailto:melissa.bello@alu.umh.es) (M.B.-P.); [rocio.diaz01@goumh.umh.es](mailto:rocio.diaz01@goumh.umh.es) (R.D.P.)

<sup>2</sup> The Birchall Centre, Lennard-Jones Laboratories, Keele University, Keele, Staffordshire, ST5 5BG, United Kingdom; [matthew.j.mold@gmail.com](mailto:matthew.j.mold@gmail.com) (M.M.)

<sup>3</sup> Fish Disease Research Unit, Institute for Parasitology, University of Veterinary Medicine, 30559 Hannover, Germany; [mikolaj.adamek@tiho-hannover.de](mailto:mikolaj.adamek@tiho-hannover.de) (M.A.)

\* Correspondence: [alber.falco@umh.es](mailto:alber.falco@umh.es) (A.F.)

| Table S1. Representative genotype sequences for designing broad-spectrum NNV RNA1 amplification primers. |                                |          |                        |                                                                      |           |       |
|----------------------------------------------------------------------------------------------------------|--------------------------------|----------|------------------------|----------------------------------------------------------------------|-----------|-------|
| Acc. no.                                                                                                 | Isolate ref.                   | Genotype | Species host           |                                                                      | Country   | Ref.  |
|                                                                                                          |                                |          | Common name            | Scientific name                                                      |           |       |
| NC_013458.1                                                                                              | JFIwa98                        | BFNNV    | Barfin flounder        | <i>Verasper moseri</i>                                               | Japan     | [1]   |
| NC_008040.1                                                                                              | SGWak97                        | RGNNV    | Red-spotted grouper    | <i>Epinephelus akaara</i>                                            |           | [2]   |
| NC_003448.1                                                                                              |                                | SJNNV    | Striped Jack           | <i>Pseudocaranx dentex</i>                                           |           | [3]   |
| NC_013460.1                                                                                              | TPKag93                        | TPNNV    | Tiger puffer           | <i>Takifugu rubripes</i>                                             | Japan     | [1]   |
| KF386163.1                                                                                               | 389/I96                        | SJNNV    | European seabass       | <i>Dicentrarchus labrax</i>                                          | Italy     | [4]   |
| JN189814.2                                                                                               | 484.2.2009                     | SJNNV    | Senegalese sole        | <i>Solea senegalensis</i>                                            | Spain     | [5]   |
| FJ789783.1                                                                                               | 1                              | RGNNV    | European seabass       | <i>Dicentrarchus labrax</i>                                          | Tunisia   | [6]   |
| JN189909.2                                                                                               | 367.2.2005                     | RGNNV    | European seabass       | <i>Dicentrarchus labrax</i>                                          | Italy     | [5]   |
| AF319555.1                                                                                               | Singapore                      | RGNNV    | Greasy grouper         | <i>Epinephelus tauvina</i>                                           | Singapore | [7]   |
| AY369136.1                                                                                               |                                | RGNNV    | Orange-spotted grouper | <i>Epinephelus coioides</i>                                          | China     | [1,8] |
| AY721616.1                                                                                               |                                | RGNNV    | Dragon grouper         | <i>Epinephelus lanceolatus</i>                                       | China     | [1]   |
| EF558368.1                                                                                               | China 1                        | RGNNV    | Red-spotted grouper    | <i>Epinephelus akaara</i>                                            | China     | [9]   |
| JN189865.2                                                                                               | 283.2009                       | RGNNV    | European seabass       | <i>Dicentrarchus labrax</i>                                          | Italy     | [5]   |
| KP455643.1                                                                                               | SBN147                         | RGNNV    | Sea Perch              | <i>Lateolabrax japonicus</i>                                         | China     | [10]  |
| MN309751.1                                                                                               | RGNNV201                       | RGNNV    | Hybrid tiger grouper   | <i>Epinephelus fuscoguttatus</i> x<br><i>Epinephelus lanceolatus</i> | China     | [11]  |
| MT157513.1                                                                                               | CNPgg2018                      | RGNNV    | Pearl gentian grouper  | <i>Epinephelus lanceolatus</i> x<br><i>Epinephelus fuscoguttatus</i> | China     | [12]  |
| AJ401165.2                                                                                               | AH99NorA                       | BFNNV    | Atlantic halibut       | <i>Hippoglossus hippoglossus</i>                                     | Norway    | [13]  |
| MF144242.1                                                                                               | KS1                            | RGNNV    | Orange-spotted grouper | <i>Epinephelus coioides</i>                                          | Taiwan    | [14]  |
| KY315688.1                                                                                               | MENNV1310                      | RGNNV    | Marbled eel            | <i>Anguilla marmorata</i>                                            | Taiwan    |       |
| KY354681.1                                                                                               | VNNV/S.aurata/I/425-10/Sep2008 | RGNNV    | Gilthead seabream      | <i>Sparus aurata</i>                                                 | Italy     | [15]  |
| MN245301.1                                                                                               | SK-07 1324                     | BFNNV    | Atlantic cod           | <i>Gadus morhua</i>                                                  | Norway    | [16]  |
| Reference sequences are shaded.                                                                          |                                |          |                        |                                                                      |           |       |

| Table S2. Representative genotype sequences for designing broad-spectrum NNV RNA2 amplification primers. |                                   |          |                       |                                                                      |                   |      |
|----------------------------------------------------------------------------------------------------------|-----------------------------------|----------|-----------------------|----------------------------------------------------------------------|-------------------|------|
| Acc. no.                                                                                                 | Isolate ref.                      | Genotype | Species host          |                                                                      | Country           | Ref. |
|                                                                                                          |                                   |          | Common name           | Scientific name                                                      |                   |      |
| NC_013459.1                                                                                              | JFIwa98                           | BFNNV    | Barfin flounder       | <i>Verasper moseri</i>                                               | Japan             | [1]  |
| NC_008041.1                                                                                              | SGWak97                           | RGNNV    | Red-spotted grouper   | <i>Epinephelus akaara</i>                                            |                   | [2]  |
| NC_003449.1                                                                                              |                                   | SJNNV    | Striped Jack          | <i>Pseudocaranx dentex</i>                                           |                   | [3]  |
| NC_013461.1                                                                                              | TPKag93                           | TPNNV    | Tiger puffer          | <i>Takifugu rubripes</i>                                             | Japan             | [1]  |
| KY315689.1                                                                                               | MENNV1310                         | RGNNV    | Marbled eel           | <i>Anguilla marmorata</i>                                            | Taiwan            |      |
| AY744705.1                                                                                               | RGNNV-CN                          | RGNNV    | Red-spotted grouper   | <i>Epinephelus akaara</i>                                            | China             | [17] |
| JF412263.1                                                                                               | BVN-CIBA10                        | RGNNV    | Barramundi            | <i>Lates calcarifer</i>                                              | India             |      |
| KF386164.1                                                                                               | 389/I96                           | RGNNV    | European seabass      | <i>Dicentrarchus labrax</i>                                          | Italy             | [4]  |
| MN309752.1                                                                                               | RGNNV201                          | RGNNV    | Hybrid tiger grouper  | <i>Epinephelus fuscoguttatus</i> x<br><i>Epinephelus lanceolatus</i> | China             | [11] |
| EF617327.1                                                                                               | Ac06NorPp                         | BFNNV    | Atlantic cod          | <i>Gadus morhua</i>                                                  | Norway            |      |
| FJ789784.1                                                                                               | 1                                 | RGNNV    | European seabass      | <i>Dicentrarchus labrax</i>                                          | Tunisia           | [6]  |
| JN189992.2                                                                                               | 283.2009                          | RGNNV    | European seabass      | <i>Dicentrarchus labrax</i>                                          | Italy             | [5]  |
| MG637439.1                                                                                               | ZN521                             | RGNNV    | Pearl gentian grouper | <i>Epinephelus lanceolatus</i> x<br><i>Epinephelus fuscoguttatus</i> | China             |      |
| KM588181.1                                                                                               | GGNNV20131122                     | RGNNV    | Giant grouper         | <i>Epinephelus lanceolatus</i>                                       | Taiwan            | [18] |
| JN189919.2                                                                                               | 484.2.2009                        | SJNNV    | Senegalese sole       | <i>Solea senegalensis</i>                                            | Spain             | [5]  |
| JN189936.2                                                                                               | 367.2.2005                        | SJNNV    | European seabass      | <i>Dicentrarchus labrax</i>                                          | Italy             | [5]  |
| KY354694.1                                                                                               | VNNV/S.aurata/I/425-10/Sep2008    | RGNNV    | Gilthead seabream     | <i>Sparus aurata</i>                                                 | Italy             |      |
| GU592791.1                                                                                               | LcNNV                             | RGNNV    | Barramundi            | <i>Lates calcarifer</i>                                              | India             |      |
| KY354702.2                                                                                               | VNNV/S.aurata/Farm1/461-1/Nov2014 | SJNNV    | Gilthead seabream     | <i>Sparus aurata</i>                                                 | Mediterranean Sea | [19] |
| AF245003.1                                                                                               |                                   | RGNNV    | Malabar grouper       | <i>Epinephelus malabaricus</i>                                       | Taiwan            | [20] |
| AF245004.1                                                                                               |                                   | RGNNV    | Giant grouper         | <i>Epinephelus lanceolatus</i>                                       | Taiwan            | [20] |
| KM576685.1                                                                                               | PCNNV                             | BFNNV    | Pacific cod           | <i>Gadus macrocephalus</i>                                           | China             | [21] |
| AF499774.1                                                                                               |                                   | RGNNV    | Guppy                 | <i>Poecilia reticulata</i>                                           | Singapore         | [22] |
| KU705815.1                                                                                               | VI37                              | RGNNV    | Mouse grouper         | <i>Cromileptes altivelis</i>                                         | Vietnam           | [23] |
| JX402858.1                                                                                               | Tilapia-CU-2011                   | RGNNV    | Nile tilapia          | <i>Oreochromis niloticus</i>                                         | Thailand          | [24] |
| Reference sequences are shaded.                                                                          |                                   |          |                       |                                                                      |                   |      |

| Table S3. BLASTn top resulting records similar to the RNA1 sequence from the NNV isolated in this work. |                   |                                             |           |             |             |         |            |          |
|---------------------------------------------------------------------------------------------------------|-------------------|---------------------------------------------|-----------|-------------|-------------|---------|------------|----------|
| Accession                                                                                               | Coverage          | Scientific Name                             | Max Score | Total Score | Query Cover | E value | Per. ident | Acc. Len |
| JN189865.2                                                                                              | complete cds      | Dicentrarchus labrax betanodavirus          | 1415      | 1415        | 100%        | 0.0     | 99.49      | 3103     |
| MF144242.1                                                                                              | complete sequence | Epinephelus coioides nervous necrosis virus | 1349      | 1349        | 100%        | 0.0     | 97.95      | 3100     |
| KY930893.1                                                                                              | complete cds      | Betanodavirus sp.                           | 1349      | 1349        | 100%        | 0.0     | 97.95      | 2946     |
| MH758753.1                                                                                              | complete cds      | Redspotted grouper nervous necrosis virus   | 1343      | 1343        | 100%        | 0.0     | 97.82      | 3024     |
| KC696563.1                                                                                              | complete cds      | Redspotted grouper nervous necrosis virus   | 1343      | 1343        | 100%        | 0.0     | 97.82      | 2991     |
| AY324869.1                                                                                              | complete cds      | Sevenband grouper nervous necrosis virus    | 1343      | 1343        | 100%        | 0.0     | 97.82      | 3105     |
| GQ402010.1                                                                                              | complete cds      | Redspotted grouper nervous necrosis virus   | 1338      | 1338        | 100%        | 0.0     | 97.69      | 2998     |
| KY354681.1                                                                                              | complete cds      | Sparus aurata betanodavirus                 | 1332      | 1332        | 100%        | 0.0     | 97.56      | 3051     |
| FJ809938.1                                                                                              | complete cds      | Redspotted grouper nervous necrosis virus   | 1332      | 1332        | 100%        | 0.0     | 97.56      | 2949     |
| FJ803915.1                                                                                              | complete cds      | Sea bass Iberian betanodavirus              | 1327      | 1327        | 100%        | 0.0     | 97.43      | 3089     |
| AY690597.1                                                                                              | partial cds       | Redspotted grouper nervous necrosis virus   | 1327      | 1327        | 100%        | 0.0     | 97.43      | 2968     |
| KT390713.1                                                                                              | partial cds       | Grouper betanodavirus                       | 1321      | 1321        | 100%        | 0.0     | 97.30      | 2871     |
| FJ748760.1                                                                                              | complete sequence | Japanese flounder nervous necrosis virus    | 1321      | 1321        | 100%        | 0.0     | 97.30      | 3104     |
| AB373028.1                                                                                              | complete sequence | Sevenband grouper nervous necrosis virus    | 1321      | 1321        | 100%        | 0.0     | 97.30      | 3105     |
| AF319555.1                                                                                              | complete cds      | Epinephelus tauvina nervous necrosis virus  | 1321      | 1321        | 100%        | 0.0     | 97.30      | 3103     |
| AF326776.1                                                                                              | complete sequence | Epinephelus tauvina nervous necrosis virus  | 1321      | 1321        | 100%        | 0.0     | 97.30      | 3007     |
| MH181161.1                                                                                              | complete cds      | Redspotted grouper nervous necrosis virus   | 1315      | 1315        | 100%        | 0.0     | 97.18      | 3090     |
| HQ859913.1                                                                                              | complete cds      | Tiger grouper Nervous Necrosis Virus        | 1315      | 1315        | 100%        | 0.0     | 97.18      | 3024     |
| HQ859908.1                                                                                              | complete cds      | Tiger grouper Nervous Necrosis Virus        | 1315      | 1315        | 100%        | 0.0     | 97.18      | 3024     |
| HQ859892.1                                                                                              | complete cds      | Mouse grouper Nervous Necrosis Virus        | 1315      | 1315        | 100%        | 0.0     | 97.18      | 3024     |
| AY721616.1                                                                                              | complete cds      | Dragon grouper nervous necrosis virus       | 1315      | 1315        | 100%        | 0.0     | 97.18      | 3103     |
| HQ859895.1                                                                                              | complete cds      | Tiger grouper Nervous Necrosis Virus        | 1310      | 1310        | 100%        | 0.0     | 97.05      | 3024     |
| HQ859890.1                                                                                              | complete cds      | Asian seabass Nervous Necrosis Virus        | 1310      | 1310        | 100%        | 0.0     | 97.05      | 3024     |
| HQ859887.1                                                                                              | complete cds      | Asian seabass Nervous Necrosis Virus        | 1310      | 1310        | 100%        | 0.0     | 97.05      | 3024     |
| EF558368.1                                                                                              | complete cds      | Redspotted grouper nervous necrosis virus   | 1310      | 1310        | 100%        | 0.0     | 97.05      | 3103     |
| KM095958.1                                                                                              | complete sequence | Sevenband grouper nervous necrosis virus    | 1304      | 1304        | 100%        | 0.0     | 96.92      | 3103     |

|            |                   |                                              |      |      |      |     |       |      |
|------------|-------------------|----------------------------------------------|------|------|------|-----|-------|------|
| MN097800.1 | partial cds       | Betanodavirus sp.                            | 1299 | 1299 | 100% | 0.0 | 96.79 | 2727 |
| MN097798.1 | complete cds      | Betanodavirus sp.                            | 1299 | 1299 | 100% | 0.0 | 96.79 | 2961 |
| HQ859916.1 | complete cds      | Asian seabass Nervous Necrosis Virus         | 1299 | 1299 | 100% | 0.0 | 96.79 | 3024 |
| HQ859911.1 | complete cds      | Asian seabass Nervous Necrosis Virus         | 1299 | 1299 | 100% | 0.0 | 96.79 | 3024 |
| FJ803913.1 | complete cds      | Gilthead sea bream Iberian betanodavirus     | 1299 | 1299 | 100% | 0.0 | 96.79 | 3101 |
| GQ904198.1 | complete cds      | Golden pompano nervous necrosis virus        | 1299 | 1299 | 100% | 0.0 | 96.79 | 3024 |
| FJ789783.1 | complete sequence | Redspotted grouper nervous necrosis virus    | 1299 | 1299 | 100% | 0.0 | 96.79 | 3104 |
| KU705814.1 | complete sequence | Mouse grouper Nervous Necrosis Virus         | 1293 | 1293 | 100% | 0.0 | 96.66 | 3017 |
| FJ803914.1 | complete cds      | Senegalese sole Iberian betanodavirus        | 1293 | 1293 | 100% | 0.0 | 96.66 | 3042 |
| FJ803912.1 | complete cds      | Gilthead sea bream Iberian betanodavirus     | 1293 | 1293 | 100% | 0.0 | 96.66 | 3065 |
| MG387122.1 | complete cds      | Betanodavirus sp.                            | 1288 | 1288 | 100% | 0.0 | 96.53 | 3105 |
| KP455643.1 | complete sequence | Sevenband grouper nervous necrosis virus     | 1288 | 1288 | 100% | 0.0 | 96.53 | 3103 |
| FJ803911.2 | complete cds      | Senegalese sole Iberian betanodavirus        | 1288 | 1288 | 100% | 0.0 | 96.53 | 3105 |
| KJ541747.1 | complete cds      | Redspotted grouper nervous necrosis virus    | 1288 | 1288 | 100% | 0.0 | 96.53 | 3103 |
| JN189909.2 | complete cds      | Dicentrarchus labrax betanodavirus           | 1288 | 1288 | 100% | 0.0 | 96.53 | 3104 |
| KY354688.2 | complete sequence | Sparus aurata betanodavirus                  | 1288 | 1288 | 100% | 0.0 | 96.53 | 2984 |
| FJ803916.1 | complete cds      | Gilthead sea bream Iberian betanodavirus     | 1288 | 1288 | 100% | 0.0 | 96.53 | 3051 |
| MG874757.1 | complete sequence | Epinephelus coioides nervous necrosis virus  | 1282 | 1282 | 100% | 0.0 | 96.41 | 3103 |
| KF668184.1 | complete cds      | Redspotted grouper nervous necrosis virus    | 1277 | 1277 | 100% | 0.0 | 96.28 | 3024 |
| GQ402012.1 | complete cds      | Redspotted grouper nervous necrosis virus    | 1277 | 1277 | 100% | 0.0 | 96.28 | 2998 |
| MN309751.1 | complete sequence | Hulong grouper nervous necrosis virus        | 1271 | 1271 | 100% | 0.0 | 96.15 | 3103 |
| KY785170.1 | partial cds       | Sparus aurata betanodavirus                  | 1269 | 1269 | 100% | 0.0 | 96.02 | 2826 |
| MT157513.1 | complete cds      | Pearl gentian grouper nervous necrosis virus | 1249 | 1249 | 100% | 0.0 | 95.64 | 3103 |
| AY369136.1 | complete sequence | Redspotted grouper nervous necrosis virus    | 1249 | 1249 | 100% | 0.0 | 95.64 | 3103 |
| MG600032.1 | complete cds      | Betanodavirus sp.                            | 1238 | 1238 | 100% | 0.0 | 95.38 | 3109 |
| MN709776.1 | complete cds      | Redspotted grouper nervous necrosis virus    | 1232 | 1232 | 100% | 0.0 | 95.25 | 3024 |
| KY315688.1 | complete sequence | Redspotted grouper nervous necrosis virus    | 1232 | 1232 | 100% | 0.0 | 95.25 | 3095 |
| HQ859906.1 | complete cds      | Tiger grouper Nervous Necrosis Virus         | 1232 | 1232 | 100% | 0.0 | 95.25 | 3024 |
| HQ859903.1 | complete cds      | Asian seabass Nervous Necrosis Virus         | 1232 | 1232 | 100% | 0.0 | 95.25 | 3024 |

|            |              |                                       |      |      |      |     |       |      |
|------------|--------------|---------------------------------------|------|------|------|-----|-------|------|
| HQ859900.1 | complete cds | Golden pompano nervous necrosis virus | 1232 | 1232 | 100% | 0.0 | 95.25 | 3024 |
| HQ859898.1 | complete cds | Asian seabass Nervous Necrosis Virus  | 1227 | 1227 | 100% | 0.0 | 95.12 | 3024 |

| Table S4. BLASTn top resulting records similar to the RNA2 sequence from the NNV isolated in this work. |                   |                                              |           |             |             |         |            |          |
|---------------------------------------------------------------------------------------------------------|-------------------|----------------------------------------------|-----------|-------------|-------------|---------|------------|----------|
| Accession                                                                                               | Coverage          | Scientific Name                              | Max Score | Total Score | Query Cover | E value | Per. ident | Acc. Len |
| JN189992.2                                                                                              | complete cds      | Dicentrarchus labrax betanodavirus           | 1799      | 1799        | 100%        | 0.0     | 99.59      | 1433     |
| MN709777.1                                                                                              | complete cds      | Redspotted grouper nervous necrosis virus    | 1600      | 1600        | 100%        | 0.0     | 95.95      | 1362     |
| HQ859938.1                                                                                              | complete cds      | Tiger grouper Nervous Necrosis Virus         | 1594      | 1594        | 100%        | 0.0     | 95.85      | 1363     |
| HQ859935.1                                                                                              | complete cds      | Asian seabass Nervous Necrosis Virus         | 1589      | 1589        | 100%        | 0.0     | 95.74      | 1363     |
| HQ859945.1                                                                                              | complete cds      | Tiger grouper Nervous Necrosis Virus         | 1583      | 1583        | 100%        | 0.0     | 95.64      | 1363     |
| HQ859924.1                                                                                              | complete cds      | Mouse grouper Nervous Necrosis Virus         | 1583      | 1583        | 100%        | 0.0     | 95.64      | 1363     |
| HQ859930.1                                                                                              | complete cds      | Asian seabass Nervous Necrosis Virus         | 1583      | 1583        | 100%        | 0.0     | 95.65      | 1363     |
| AY721615.1                                                                                              | complete cds      | Dragon grouper nervous necrosis virus        | 1578      | 1578        | 100%        | 0.0     | 95.54      | 1433     |
| MH758754.1                                                                                              | complete cds      | Redspotted grouper nervous necrosis virus    | 1572      | 1572        | 100%        | 0.0     | 95.44      | 1358     |
| GU826692.1                                                                                              | complete sequence | Lates calcarifer nervous necrosis virus      | 1572      | 1572        | 100%        | 0.0     | 95.44      | 1434     |
| KC696562.1                                                                                              | complete cds      | Redspotted grouper nervous necrosis virus    | 1567      | 1567        | 100%        | 0.0     | 95.34      | 1366     |
| HQ859948.1                                                                                              | complete cds      | Asian seabass Nervous Necrosis Virus         | 1567      | 1567        | 100%        | 0.0     | 95.34      | 1363     |
| HM485328.1                                                                                              | complete sequence | Lates calcarifer nervous necrosis virus      | 1567      | 1567        | 100%        | 0.0     | 95.34      | 1434     |
| AY324870.1                                                                                              | complete cds      | Sevenband grouper nervous necrosis virus     | 1567      | 1567        | 100%        | 0.0     | 95.34      | 1434     |
| AF281657.1                                                                                              | complete cds      | Epinephelus tauvina nervous necrosis virus   | 1567      | 1567        | 100%        | 0.0     | 95.34      | 1368     |
| MG637439.1                                                                                              | complete cds      | Pearl gentian grouper nervous necrosis virus | 1561      | 1561        | 100%        | 0.0     | 95.24      | 1432     |
| HQ859927.1                                                                                              | complete cds      | Tiger grouper Nervous Necrosis Virus         | 1561      | 1561        | 100%        | 0.0     | 95.24      | 1363     |
| AB373029.1                                                                                              | complete sequence | Sevenband grouper nervous necrosis virus     | 1561      | 1561        | 100%        | 0.0     | 95.24      | 1433     |
| AY690596.1                                                                                              | complete cds      | Redspotted grouper nervous necrosis virus    | 1561      | 1561        | 100%        | 0.0     | 95.24      | 1430     |
| MF510920.1                                                                                              | complete cds      | Epinephelus coioides nervous necrosis virus  | 1555      | 1555        | 100%        | 0.0     | 95.14      | 1433     |
| KY354694.1                                                                                              | complete cds      | Sparus aurata betanodavirus                  | 1555      | 1555        | 100%        | 0.0     | 95.14      | 1416     |
| MW590702.1                                                                                              | complete sequence | Redspotted grouper nervous necrosis virus    | 1555      | 1555        | 100%        | 0.0     | 95.14      | 1316     |
| GU826693.1                                                                                              | complete cds      | Lates calcarifer nervous necrosis virus      | 1555      | 1555        | 100%        | 0.0     | 95.14      | 1089     |
| MT157514.1                                                                                              | complete cds      | Pearl gentian grouper nervous necrosis virus | 1550      | 1550        | 100%        | 0.0     | 95.04      | 1434     |

**Figure S1. Multiple sequence alignment of RNA1 sequences from the selected genotype representatives.**

| GB acc. no  |                                                               | bp  |
|-------------|---------------------------------------------------------------|-----|
| AY369136.1  | TAACATCACCTTCTTGCTCTGTTGAGTCATCACTTACGCAAGGTTACCGTTCAGCTTAGA  | 60  |
| KY315688.1  | -----CTTCTTGCTCTGTTGAGTAATCACTTACGCAAGGTTACCGTTCAGCTTAGA      | 51  |
| JN189909.2  | TAACATCACCTTCTTGCTCTGTTGAGTAATCACTTACGCAAGGTTACCGTTCAGCTTAGA  | 60  |
| MT157513.1  | TTACATCACCTTCTTGCTCTGTTGAGTAATCACTTACGCAAGGTTACCGTTCAGCTTAGA  | 60  |
| JN189865.2  | TAACATCACCTTCTTGCTCTGTTGAGTAATCACTTACGCAAGGTTACCGTTCAGCTTAGA  | 60  |
| MF144242.1  | TAACATCACCTTCTTGCTCTGTTGAGTAATCACTTACGCAAGGTTACCGTTCAGCTTAGA  | 60  |
| AF319555.1  | TAACATCACCTTCTTGCTCTGTTGAGTAATCACTTACGCAAGGTTACCGTTCAGCTTAGA  | 60  |
| FJ789783.1  | TAACATCACCTTCTTGCTCTGTTGAGTAATCACTTACGCAAGGTTACCGTTCAGCTTAGA  | 60  |
| NC_008040.1 | TAACATCACCTTCTTGCTCTGTTGAGTAATCACTTACGCAAGGTTACCGTTTAGCTTAGA  | 60  |
| EF558368.1  | TAACATCACCTTCTTGCTCTGTTGAGTCATCACTTACGCAAGGTTACCGTTCAGCTTAGA  | 60  |
| AY721616.1  | TAACATCACCTTCTTGCTCTGTTGAGTAATCACTTACGCAAGGTTACCGTTCAGCTTAGA  | 60  |
| KY354681.1  | ---CATCACCTTCTTGCTCTGTTGAGTAATCACTTACGCAAGGTTACCGTTCAGCTTAGA  | 57  |
| KP455643.1  | TAACATCACCTTCTTGCTCTGTTGAGTAATCACTTACGCAAGGTTACCGTTCAGCTTAGA  | 60  |
| MN309751.1  | TAACATCACCTTCTTGCTCTGTTGAGTAATCACTTACGCAAGGTTACCGTTCAGCTTAGA  | 60  |
|             | *****                                                         |     |
| AY369136.1  | CAACGACAAGTCTACGCCATGCGTCGCTTTGAGTTCGCACTCGCACGCATGTCTGGAGCA  | 120 |
| KY315688.1  | CAACGACAAGTCTAGGCCATGCGTCGCTTTGAGTTCGCACTCGCACGCATGACTGGAGCA  | 111 |
| JN189909.2  | CAACGACAAGTCTACGCCATGCGTCGCTTTGAGTTCGCACTCGCACGCATGTCTGGAGCA  | 120 |
| MT157513.1  | CA-AGACAAGTCTACGCCATGCGTCGCTTTGAGTTTGCACTCGCACGCATGTCTGGAGCA  | 119 |
| JN189865.2  | CAACGACAAGTCTACGCCATGCGTCGCTTTGAGTTTGCACTCGCACGCATGTCTGGAGCA  | 120 |
| MF144242.1  | CAACGACAAGTCTACGCCATGCGTCGCTTTGAGTTCGCACTCGCACGCATGTCTGGAGCA  | 120 |
| AF319555.1  | CAACGACAAGTCTACGCCATGCGTCGCTTTGAGTTTGCACTCGCACGCATGTCTGGAGCA  | 120 |
| FJ789783.1  | CAACGACAAGTCTACGCCATGCGTCGCTTTGAGTTTGCACTCGCACGCATGTCTGGAGCA  | 120 |
| NC_008040.1 | CAACGACAAGTCTACGCCATGCGTCGCTTTGAGTTTGCACTCGCACGCATGTCTGGAGCA  | 120 |
| EF558368.1  | CAACGACAAGTCTACGCCATGCGTCGCTTTGAGTTTGCACTCGCACGCATGTCTGGAGCA  | 120 |
| AY721616.1  | CAACGACAAGTCTACGCCATGCGTCGCTTTGAGTTTGCACTCGCACGCATGTCTGGAGCA  | 120 |
| KY354681.1  | CAACGACAAGTCTACGCCATGCGTCGCTTTGAGTTTGCACTCGCACGCATGTCTGGAGCA  | 117 |
| KP455643.1  | CAACGACAAGTCTACGCCATGCGTCGCTTTGAGTTTGCACTCGCACGCATGTCTGGAGCA  | 120 |
| MN309751.1  | CAACGACAAGTCTACGCCATGCGTCGCTTTGAGTTTGCACTCGCACGCATGTCTGGAGCA  | 120 |
|             | ** *****                                                      |     |
| AY369136.1  | GCATTTTGTGTGTACACAGGCTACCGCTGTTGACCTCAAAATGGCTCGCGGACCGTGTT   | 180 |
| KY315688.1  | GCATTTTGTGTGTACACAGGCTACCGCTGTTGACCTCAAAATGGCTCGCGGACCGTGTT   | 171 |
| JN189909.2  | GCATTTTGTGTGTACACAGGCTACCGCTGTTGACCTCAAAATGGCTCGCGGACCGTGTT   | 180 |
| MT157513.1  | GCATTTTGTGTGTACACAGGCTACCGCTGTTGACCTCAAAATGGCTCGCGGACCGTGTT   | 179 |
| JN189865.2  | GCATTTTGTGTGTACACAGGCTATCGCTGTTGACCTCAAAATGGCTCGCGGACCGTGTC   | 180 |
| MF144242.1  | GCATTTTGTGTGTACACAGGCTACCGCTGTTGACCTCAAAATGGCTCGCGGACCGTGTT   | 180 |
| AF319555.1  | GCATTTTGTGTGTACACAGGCTACCGCTGTTGACCTCAAAATGGCTCGCGGACCGTGTT   | 180 |
| FJ789783.1  | GCATTTTGTGTGTACACAGGCTATCGCTGTTGACCTCAAAATGGCTCGCGGACCGTGTC   | 180 |
| NC_008040.1 | GCATTTTGTGTGTACACAGGCTACCGCTGTTGACCTCAAAATGGCTCGCGGACCGTGTT   | 180 |
| EF558368.1  | GCATTTTGTGTGTACACAGGCTACCGCTGTTGACCTCAAAATGGCTCGCGGACCGTGTT   | 180 |
| AY721616.1  | GCATTTTGTGTGTACACAGGCTACCGCTGTTGACCTCAAAATGGCTCGCGGACCGTGTT   | 180 |
| KY354681.1  | GCATTTTGTGTGTACACAGGCTACCGCTGTTGACCTCAAAATGGCTCGCGGACCGTGTT   | 177 |
| KP455643.1  | GCATTTTGTGTGTACACAGGCTACCGCTGTTGACCTCAAAATGGCTCGCGGACCGTGTT   | 180 |
| MN309751.1  | GCATTTTGTGTGTACACAGGCTACCGCTGTTGACCTCAAAATGGCTCGCGGACCGTGTT   | 180 |
|             | *****                                                         |     |
| AY369136.1  | GAGGATTATCGCCAACGCATCATCGCTGAGAAGAAACAAGTTCTCCGTGATGCGGCCATG  | 240 |
| KY315688.1  | GAGGATTATCGCCATCGCATCATCGCTGAGAAGAAACAAGTTCTCCGTGATGCGGCCATG  | 231 |
| JN189909.2  | GAGGATTATCGCCAACGCATCATCGCTGAGAAGAAACAAGTTCTCCGTGATGCGGCCATG  | 240 |
| MT157513.1  | GAGGATTATCGCCAACGCATCATCGCTGAGAAGAAACAAGTTCTCCGTGATGCGGCCATG  | 239 |
| JN189865.2  | GAGGATTATCGCCAACGCGTCATTGCTGAGAAGAAACAAGTTCTCCGTGATGCGGCCATG  | 240 |
| MF144242.1  | GAGGATTATCGCCAACGCGTCATCGCTGAGAAGAAACAAGTTCTCCGTGACGCGGCCATG  | 240 |
| AF319555.1  | GAGGATTATCGCCAACGCATCATCGCTGAGAAGAAACAAGTTCTCCGTGATGCGGCCATG  | 240 |
| FJ789783.1  | GAGGATTATCGCCAACGCGTCATTGCTGAGAAGAAACAAGTTCTCCGTGATGCGGCCATG  | 240 |
| NC_008040.1 | GAGGATTATCGCCAACGCGTCATCGCTGAGAAGAAACAAGTTCTCCGTGATGCGGCCATG  | 240 |
| EF558368.1  | GAGGATTATCGCCAACGCGTCACCGCTGAGAAGAAACAAGTTCTCCGTGATGCGGCCATG  | 240 |
| AY721616.1  | GAGGATTATCGCCAACGCGTCATCGCTGAGAAGAAACAAGTTCTCCGTGACGCGGCCATG  | 240 |
| KY354681.1  | GAGGATTATCGCCAACGCGTCATCGCTGAGAAGAAACAAGTTCTCCGTGACGCGGCCATG  | 237 |
| KP455643.1  | GAGGATTATCGCCAACGCGTCATCGCTGAGAAGAAACAAGTTCTCCGTGACGCGGCCATG  | 240 |
| MN309751.1  | GAGGATTATCGCCAACGCGTCATCGCTGAGAAGAAACAAGTTCTCCGTGACGCGGCCATG  | 240 |
|             | *****                                                         |     |
| AY369136.1  | ATCCGGACTCAGATCCAGCGGAAATGGAATTGGTGCGCATCTCGGTGCGCAAAGGCCAT   | 300 |
| KY315688.1  | ATCCGGACTCAGATCCAGCGGAAATGGAATTGGTGCGCATTTCCGGTGCGBAAAGGCCAT  | 291 |
| JN189909.2  | ATCCGGACTCAGATCCAGCGGAAATGGAATTGGTGCGCATCTCGGTGCGCAAAGGCCAT   | 300 |
| MT157513.1  | ATCCGGACTCAGATCCAGCGGAAATGGAGCTGGTGCGCATCTCGGTGCGCAAAGGCCAT   | 299 |
| JN189865.2  | ATCCGGACTCAGATCCAGCGGAAATGGAACCTGGTACGCATTTCCGGTGCGBAAAGGCCAT | 300 |
| MF144242.1  | ATCCGGACTCAGATCCAGCGGAAATGGAGCTAGTGCGCATTTCCGGTGCGBAAAGGCCAT  | 300 |
| AF319555.1  | ATCCGTACTCAGATCCAGCGGAAATGGAGCTGGTGCGCATCTCGGTGCGCAAAGGCCAT   | 300 |
| FJ789783.1  | ATCCGGACTCAGATCCAGCGGAAATGGAACCTGGTGCGCATTTCCGGTGCGBAAAGGCCAT | 300 |



|             |                                                               |     |
|-------------|---------------------------------------------------------------|-----|
| NC_008040.1 | ATCCGGACTCAGATCCAGCGGGAAATGGAAGTGGTGCGTATCTCGGTGCGCAAAGGCCAT  | 300 |
| EF558368.1  | ATCCGGACTCAGATCCAGCGGGAAATGGAAGTGGTGCGTATCTCGGTGCGCAAAGGCCAT  | 300 |
| AY721616.1  | ATCCGGACTCAGATCCAGCGGGAAATGGAGCTAGTGCGTATCTCGGTGCGCAAAGGCCAT  | 300 |
| KY354681.1  | ATCCGGACTCAGATCCAGCGGGAAATGGAGCTAGTGCGCATTTTCGGTGCGCAAAGGCCAT | 297 |
| KP455643.1  | ATCCGGACTCAGATCCAGCGGGAAATGGAGCTAGTGCGCATTTTCGGTGCGCAAAGGCCAT | 300 |
| MN309751.1  | ATCCGGACCCAGATCCAGCGGGAAATGGAGCTAGTGCGCATCTCGGTGCGCAAAGGCCAT  | 300 |
|             | ***** ** ***** * ** * * ***** *                               |     |
| AY369136.1  | TCCCATCAGGAAGCTGCTACTGAGCGTAACAGCGCCACTGAGACCATGCTCGGTGTGGTG  | 360 |
| KY315688.1  | TCCCATCAGGAAGCTGCTACTGAGCGTAACAGCGCCACTGAGACCATGCTCGGTGTGGTG  | 351 |
| JN189909.2  | TCCCATCAGGAAGCTGCTACTGAGCGTAACAGCGCCACTGAGACCATGCTCGGTGTGGTG  | 360 |
| MT157513.1  | TCCCACCAGGAAGCTGCTACTGAGCGTAACAGCGCCACTGAAACCATGCTCGGTGTGGTG  | 359 |
| JN189865.2  | TCCCACCAGGAAGCTGCTACTGAGCGTAACAGCGCCACTGAGACCATGCTCGGTGTGGTG  | 360 |
| MF144242.1  | TCCCATCAGGAAGCCGCTACTGAGCGTAACAGCGCTACTGAGACCATGCTCGGTGTGGTG  | 360 |
| AF319555.1  | TCCCACCAGGAAGCTGCTACTGAGCGTAACAGCGCCACTGAGACCATGCTCGGTGTGGTG  | 360 |
| FJ789783.1  | TCCCATCAGGAAGCCGCTACTGAGCGTAACAGCGCTACTGAGACCATGCTCGGTGTGGTG  | 360 |
| NC_008040.1 | TCCCATCAGGAAGCCGCTACTGAGCGTAACAGCGCTACTGAGACCATGCTCGGTGTGGTG  | 360 |
| EF558368.1  | TCCCATCAGGAAGCCGCTACTGAGCGTAACAGCGCTACTGAGACCATGCTCGGTGTGGTG  | 360 |
| AY721616.1  | TCCCATCAGGAAGCCGCTACTGAGCGTAACAGCGCCACTGAGACCATGCTCGGTGTGGTG  | 360 |
| KY354681.1  | TCCCATCAGGAAGCCGCTACTGAGCGTAACAGCGCTACTGAGACCATGCTCGGTGTGGTG  | 357 |
| KP455643.1  | TCCCATCAGGAAGCCGCTACTGAGCGTAACAGCGCTACTGAGACCATGCTCGGTGTGGTG  | 360 |
| MN309751.1  | TCCCATCAGGAAGCCGCTACTGAGCGTAACAGCGCTACTGAGACCATGCTCGGTGTGGTG  | 360 |
|             | ***** ***** ***** ***** ***** ***** *****                     |     |
| AY369136.1  | GAGAAATGTGGCTATGAGCCATATGTCAATTTACCATCACCCCGTGAGGTTGGATACCAC  | 420 |
| KY315688.1  | GAGAAATGTGGCTATGAGCCATATGTCAATTTACCATCACCCCGTGAGGTTGGATACCAC  | 411 |
| JN189909.2  | GAGAAATGTGGCTATGAGCCATATGTCAATTTACCATCACCCCGTGAGGTTGGATACCAC  | 420 |
| MT157513.1  | GAGAAATGTGGCTACGAGCCATATGTATCTCTCCATCACCCCGTGAGGTTGGATACCAC   | 419 |
| JN189865.2  | GAGAAATGCGGCTACGAGCCATATGTCAATTTACCATCACCCCGTGAGGTTGGATACCAC  | 420 |
| MF144242.1  | GAGAAATGTGGCTACGAGCCATATGTCAATTTACCATCACCCCGTGAGGTTGGATACCAC  | 420 |
| AF319555.1  | GAGAAATGTGGCTACGAGCCATATGTCAATTTCTCCATCACCCCGTGAGGTTGGATACCAC | 420 |
| FJ789783.1  | GAGAAATGTGGCTACGAGCCATATGTCAATTTACCATCACCCCGTGAGGTTGGATACCAC  | 420 |
| NC_008040.1 | GAGAAATGTGGCTACGAGCCATATGTCAATTTACCATCACCCCGTGAGGTTGGATACCAC  | 420 |
| EF558368.1  | GAGAAATGTGGCTACGAGCCATATGTCAATTTACCATCACCCCGTGAGGTTGGATACCAC  | 420 |
| AY721616.1  | GAGAAATGTGGCTACGAGCCATATGTCAATTTACCATCACCCCGTGAGGTTGGATACCAC  | 420 |
| KY354681.1  | GAGAAATGTGGCTACGAGCCATATGTCAATTTACCATCACCCCGTGAGGTTGGATACCAC  | 417 |
| KP455643.1  | GAGAAATGTGGCTACGAGCCATATGTCAATTTACCATCACCCCGTGAGGTTGGATACCAC  | 420 |
| MN309751.1  | GAGAAATGTGGCTACGAGCCATATGTCAATTTACCATCACCCCGTGAGGTTGGATACCAC  | 420 |
|             | ***** ***** ***** ** ** * ***** ***** ***** *                 |     |
| AY369136.1  | GGGTCACGTCAGTTCTACAGTCTGGCGGATTTCCGCCAAGACTACCGTCGCGATGACATC  | 480 |
| KY315688.1  | GGGTCACGTCAGTTCTACAGTCTGGCGGATTTCCGCCAAGACTACCGTCGCGATGACATC  | 471 |
| JN189909.2  | GGGTCACGTCAGTTCTATAGTCTGGCAGATTTTCGCCAAGACTACCGTCGCGATGACATC  | 480 |
| MT157513.1  | GGGTCACGTCAGTTCTATAGTCTGGCAGATTTTCGCCAAGACTACCGTCGCGATGACATC  | 479 |
| JN189865.2  | GGGTCACGTCAGTTCTATAGTCTGGCAGATTTTCGCCAAGACTACCGTCGCGATGACATC  | 480 |
| MF144242.1  | GGGTCACGTCAGTTCTATAGTCTGGCAGATTTTCGCCAAGACTACCGTCGCGATGACATC  | 480 |
| AF319555.1  | GGGTCACGTCAGTTCTATAGTCTGGCAGATTTTCGCCAAGACTACCGTCGCGATGACATC  | 480 |
| FJ789783.1  | GGGTCACGTCAGTTCTATAGTCTGGCAGATTTTCGCCAAGACTACCGTCGCGATGACATC  | 480 |
| NC_008040.1 | GGGTCACGTCAGTTCTATAGTCTGGCAGATTTTCGCCAAGACTACCGTCGCGATGACATC  | 480 |
| EF558368.1  | GGGTCACGTCAGTTCTATAGTCTGGCAGATTTTCGCCAAGACTACCGTCGCGATGACATC  | 480 |
| AY721616.1  | GGGTCACGTCAGTTCTATAGTCTGGCAGATTTTCGCCAAGACTACCGTCGCGATGACATC  | 480 |
| KY354681.1  | GGGTCACGTCAGTTCTATAGTCTGGCAGATTTTCGCCAAGACTACCGTCGCGATGACATC  | 477 |
| KP455643.1  | GGGTCACGTCAGTTCTATAGTCTGGCAGATTTTCGCCAAGACTACCGTCGCGATGACATC  | 480 |
| MN309751.1  | GGGTCACGTCAGTTCTATAGTCTGGCAGATTTTCGCCAAGACTACCGTCGCGATGACATC  | 480 |
|             | ***** ** ** ***** ** ** ***** ***** ***** *                   |     |
| AY369136.1  | ACCGACCGTCACATCATTGTGATGACTGATGTTGACTACTACGTGGACATGCATGAGTTG  | 540 |
| KY315688.1  | ACCGACCGTCACATCATTGTGATGACTGATGTTGACTATTACGTGGACATGCATGAGTTG  | 531 |
| JN189909.2  | ACCGACCGTCACATCATTGTGATGACTGATGTTGACTACTACGTGGACATGCATGAGTTG  | 540 |
| MT157513.1  | ACCGACCGTCACATCATTGTGATGACTGATGTTGACTACTACGTGGACATGCATGAGTTG  | 539 |
| JN189865.2  | ACCGACCGTCACATCATTGTGATGACTGATGTTGACTACTACGTGGACATGCATGAGTTG  | 540 |
| MF144242.1  | ACCGACCGTCACATCATTGTGATGACTGATGTTGACTACTACGTGGACATGCATGAGTTG  | 540 |
| AF319555.1  | ACCGACCGTCACATCATTGTGATGACTGATGTTGACTACTACGTGGACATGCATGAGTTG  | 540 |
| FJ789783.1  | ACCGACCGTCACATCATTGTGATGACTGATGTTGACTACTACGTGGACATGCATGAGTTA  | 540 |
| NC_008040.1 | ACCGACCGTCACATCATTGTGATGACTGATGTTGACTACTACGTGGACATGCATGAGTTG  | 540 |
| EF558368.1  | ACCGACCGTCACATCATTGTGATGACTGATGTTGACTACTACGTGGACATGCATGAGTTG  | 540 |
| AY721616.1  | ACCGACCGTCACATCATTGTGATGACTGATGTTGACTACTACGTGGACATGCATGAGTTG  | 540 |
| KY354681.1  | ACCGACCGTCACATCATTGTGATGACTGATGTTGACTACTACGTGGACATGCATGAGTTG  | 537 |
| KP455643.1  | ACCGACCGTCACATCATTGTGATGACTGATGTTGACTACTACGTGGACATGCATGAGTTG  | 540 |
| MN309751.1  | ACCGACCGTCACATCATTGTGATGACTGATGTTGACTACTACGTGGACATGCATGAGTTG  | 540 |
|             | ***** ** ***** ***** ***** ***** *****                        |     |
| AY369136.1  | ATTGGTTTGGGTGTTCCGATATTGTTGTACACCTTCCAGCCAAGTACTGTGTCGGGAGAA  | 600 |
| KY315688.1  | ATTGGATTGGGTGTTCCGATATTGTTGTACACCTTCCAGCCAGTACTGTGTCGGGAGAA   | 591 |
| JN189909.2  | ATTGGTCTGGGTGTTCCGATATTACTGTACACCTTCCAGCCAAGTACTGTGTCGGGAGAG  | 600 |
| MT157513.1  | ATTGGTTTGGGTGTTCCGATATTGCTGTACACCTTCCAGCCAAGTACTGTGTCGGGAGAG  | 599 |
| JN189865.2  | ATTGGTTTGGGTGTTCCGATATTGCTGTACACCTTCCAGCCAAGTACTGTGTCGGGGAG   | 600 |

|             |                                                               |     |
|-------------|---------------------------------------------------------------|-----|
| MF144242.1  | ATTGGTTTGGGTGTTCCGATACTGCTATACACCTTCCAGCCAAGTACTGTGTCCGGAGAG  | 600 |
| AF319555.1  | ATTGGTTTGGGTGTTCCGATAATTGTTGTACACCTTCCAGCCAAGTACTGTGTCCGGAGAG | 600 |
| FJ789783.1  | ATTGGTTTGGGTGTTCCAATATTGCTGTACACCTTCCAGCCAAGTACTGTGTCCGGAGAG  | 600 |
| NC_008040.1 | ATTGGTTTGGGTGTTCCGATAATTGCTGTACACCTTCCAGCCAAGTACTGTGTCCGGAGAG | 600 |
| EF558368.1  | ATTGGTTTGGGTGTTCCGATAATTGCTGTACACCTTCCAGCCAAGTACTGTGTCCGGAGAG | 600 |
| AY721616.1  | ATTGGTTTGGGTGTTCCGATACTGCTGTACACCTTCCAGCCAAGTACTGTGTCCGGAGAG  | 600 |
| KY354681.1  | ATTGGTTTGGGTGTTCCGATACTGCTATACACCTTCCAGCCAAGTACTGTGTCCGGAGAG  | 597 |
| KP455643.1  | ATTGGTTTGGGTGTTCCGATACTGCTATACACCTTCCAGCCAAGTACTGTGTCCGGAGAG  | 600 |
| MN309751.1  | ATTGGTTTGGGTGTTCCGATACTGCTATACACCTTCCAGCCAAGTACTGTGTCCGGAGAG  | 600 |
|             | *****                                                         |     |
| AY369136.1  | GTTAAGGATGGTTACTTACCATCACTGACGACTCCGTTCACTACCGTGTTGCTGGTGGG   | 660 |
| KY315688.1  | GTTAAGGATGGTTATTTACCATCACTGACGACTCCGTTCACTACCGTGTTGCTGGTGGG   | 651 |
| JN189909.2  | GTTAAGGATGGTTACTTTACCATCACTGACGACTCCGTTCACTACCGTGTTGCTGGCGGG  | 660 |
| MT157513.1  | GTTAAGGATGGTTACTTTACCATCACTGACGACTCCGTTCACTACCGTGTTGCTGGCGGG  | 659 |
| JN189865.2  | GTCAAGGATGGTTATTTTACCATCACTGACGACTCCGTTCACTACCGTGTTGCTGGCGGG  | 660 |
| MF144242.1  | GTTAAGGATGGTTACTTTACCATCACTGACGACTCCGTTCACTACCGTGTTGCTGGCGGG  | 660 |
| AF319555.1  | GTTAAGGATGGTTACTTTACCATCACTGACGACTCCGTTCACTACCGTGTTGCTGGCGGG  | 660 |
| FJ789783.1  | GTTAAGGATGGTTACTTTACCATCACTGACGACTCCGTTCACTACCGTGTTGCTGGCGGG  | 660 |
| NC_008040.1 | GTTAAGGATGGTTACTTTACCATCACTGACGACTCCGTTCACTACCGTGTTGCTGGCGGG  | 660 |
| EF558368.1  | GTTAAGGATGGTTACTTACCATCACTGACGACTCCGTTCACTACCGTGTTGCTGGCGGG   | 660 |
| AY721616.1  | GTTAAGGATGGTTACTTTACCATCACTGACGACTCCGTTCACTACCGTGTTGCTGGCGGG  | 660 |
| KY354681.1  | GTTAAGGATGGTTACTTTACCATCACTGACGACTCCGTTCACTACCGTGTTGCTGGCGGG  | 657 |
| KP455643.1  | GTTAAGGATGGTTACTTTACCATCACTGACGACTCCGTTCACTACCGTGTTGCTGGCGGG  | 660 |
| MN309751.1  | GTTAAGGATGGTTACTTTACCATCACTGACGACTCCGTTCACTACCGTGTTGCTGGCGGG  | 660 |
|             | ** *****                                                      |     |
| AY369136.1  | AAGGATGTGCGCCACCGCATTTGGAACACAAAGATACCATGTATGTGTGCTCCCGA      | 720 |
| KY315688.1  | AAGGATGTGCGCCACCGCATTTGGAACACAAAGATACCATGTATGTGTGCTCCCGA      | 711 |
| JN189909.2  | AAGGATGTGCGCCATCGCATCTGGAACACAAAGATACCATGTATGTGTGCTCCCGA      | 720 |
| MT157513.1  | AAGGATGTGCGTCATCGCATCTGGAACACAAAGATACCATGTATGTGTGCTCCCGA      | 719 |
| JN189865.2  | AAGGATGTGCGCCATCGCATTTGGAACACAAAGATACCATGTATGTGTGCTCCCGA      | 720 |
| MF144242.1  | AAGGATGTGCGCCATCGCATCTGGAACACAAAGATACCATGTATGTGTGCTCCCGA      | 720 |
| AF319555.1  | AAGGATGTGCGCCACCGCATCTGGAACACAAAGATACCATGTATGTGTGCTCCCGA      | 720 |
| FJ789783.1  | AAGGATGTGCGCCATCGCATCTGGAACACAAAGATACCATGTATGTGTGCTCCCGA      | 720 |
| NC_008040.1 | AAGGATGTGCGCCATCGCATCTGGAACACAAAGATACCATGTATGTGTGCTCCCGA      | 720 |
| EF558368.1  | AAGGATGTGCGCCATCGCATCTGGAACACAAAGATACCATGTATGTGTGCTCCCGA      | 720 |
| AY721616.1  | AAGGATGTGCGCCATCGCATCTGGAACACAAAGATACCATGTATGTGTGCTCCCGA      | 720 |
| KY354681.1  | AAGGATGTGCGCCATCGCATCTGGAACACAAAGATACCATGTATGTGTGCTCCCGA      | 717 |
| KP455643.1  | AAGGATGTGCGCCATCGCATCTGGAACACAAAGATACCATGTATGTGTGCTCCCGA      | 720 |
| MN309751.1  | AAGGATGTGCGCCATCGCATCTGGAACACAAAGATACCATGTATGTGTGCTCCCGA      | 720 |
|             | *****                                                         |     |
| AY369136.1  | CCTCGTGGTTTCTGGGCGAATCTGGTGCAGATTCTACGTGACATCACTGGTGTACCGCG   | 780 |
| KY315688.1  | CCTCGTGGTTTCTGGGCGAATCTGGGCGGATCCTGCGTGACATCACTGGTGTACCGCG    | 771 |
| JN189909.2  | CCTCGCGGTCTCTGGGCGAATCTGTTGCAGATCCTGCGTGACATCACTGGTGTACCGCG   | 780 |
| MT157513.1  | CCTCGTGGTTTCTGGGCGAATCTGATGCAGATCCTGCGCGACATCACTGGTGTACCGCG   | 779 |
| JN189865.2  | CCTCGTGGTTTCTGGGCGAATCTGATGCAGATCCTGCGTGACATCACTGGTGTACCGCG   | 780 |
| MF144242.1  | CCTCGTGGTTTCTGGGCGAATCTGATGCAGATCCTGCGTGACATCACTGGTGTACCGCG   | 780 |
| AF319555.1  | CCTCGTGGTTTCTGGGCGAATCTGATGCAGATCCTGCGTGACATCACTGGTGTACCGCG   | 780 |
| FJ789783.1  | CCTCGTGGTTTCTGGGCGAATCTGATGCAGATCCTGCGTGATATCACTGGTGTACCGCG   | 780 |
| NC_008040.1 | CCTCGTGGTTTCTGGGCGAATTTGATGCAGATCCTGCGTGACATCACTGGTGTACCGCG   | 780 |
| EF558368.1  | CCTCGTGGTTTCTGGGCGAATCTGATGCAGATCCTGCGTGATATCACTGGTGTACCGCG   | 780 |
| AY721616.1  | CCTCGTGGTTTCTGGGCGAATCTGATGCAGATCCTGCGTGATATCACTGGTGTACCGCG   | 780 |
| KY354681.1  | CCTCGTGGTTTCTGGGCGAATCTGATGCAGATCCTGCGTGACATCACTGGTGTACCGCG   | 777 |
| KP455643.1  | CCTCGTGGTTTCTGGGCGAATCTGATGCAGATCCTGCGTGACATCACTGGTGTACCGCG   | 780 |
| MN309751.1  | CCTCGTGGTTTCTGGGCGAATCTGATGCAGATCCTGCGTGACATCACTGGTGTACCGCG   | 780 |
|             | *****                                                         |     |
| AY369136.1  | ATCTGTGGTTTCTTTACGCCAAGCTCGGTATTGCGCCCTTCGGCGACCCGTGTACCATG   | 840 |
| KY315688.1  | ATCTGTGGTTTCTTTACGCCAAGCTCGGTATTGCGCCCTTCGGCGACCCGTGTACCATG   | 831 |
| JN189909.2  | ATTTGTAGTTATCTTTACACCAAGCTCGGTATTGCGCCCTTCGGCGACCCGTGTACCATG  | 840 |
| MT157513.1  | ATCTGCAGCTTTCTTTACACCAAGCTCGGTATTGCGCCCTTCGGCGACCCGTGTACCATG  | 839 |
| JN189865.2  | ATCTGTAGCTTTCTTTACACCAAGCTCGGTATTGCGCCCTTCGGCGACCCGTGTACCATG  | 840 |
| MF144242.1  | ATCTGTAGCTTTCTTTACGCCAAGCTCGGTATTGCGCCCTTCGGCGACCCGTGTACCATG  | 840 |
| AF319555.1  | ATCTGTAGCTTTCTTTACACCAAGCTCGGTATTGCGCCCTTCGGCGACCCGTGTACCATG  | 840 |
| FJ789783.1  | ATCTGTAGCTTTCTCTACGCCAAGCTCGGTATTGCGCCCTTCGGCAACCCGTGTACCATG  | 840 |
| NC_008040.1 | ATCTGTAGCTTTCTTTACACCAAGCTCGGTATTGCGCCCTTCGGCGACCCGTGTACCATG  | 840 |
| EF558368.1  | ATCTGTAGTTTCTTTATACCAAGCTCGGTATTGCGCCCTTCGGCGACCCGTGTACCATG   | 840 |
| AY721616.1  | ATCTGTAGCTTTCTTTACACCAAGCTCGGTATTGCGCCCTTCGGCGACCCGTGTACCATG  | 840 |
| KY354681.1  | ATCTGTAGCTTTCTATACGCCAAGCTCGGTATTGCGCCCTTCGGCGACCCGTGTACCATG  | 837 |
| KP455643.1  | ATCTGTAGCTTTCTTTACGCCAAGCTCGGTATTGCGCCCTTCGGCGACCCGTGTACCATG  | 840 |
| MN309751.1  | ATCTGTAGCTTTCTTTACGCCAAGCTCGGTATTGCGCCCTTCGGCGACCCGTGTACCATG  | 840 |
|             | ** * *                                                        |     |
| AY369136.1  | TTCACCGTCGATCAATTCAAGATGGGTGAGCACCCTAACATCGTGTGATTGTGCCCTTT   | 900 |
| KY315688.1  | TTCACCGTCGATCAATTTAGGATGGGTGAGCACCCTAACATCGTGTGATTGTGCCCTTT   | 891 |

|             |                                                                |      |
|-------------|----------------------------------------------------------------|------|
| JN189909.2  | TTCACCGTTGATCAATTCAAGATGGGTGAGCACCGTAATATCGTGTGCGATTGTGCCCTTT  | 900  |
| MT157513.1  | TTCACCGTTGATCAATTCAAGATGGGTGAGCATCGTAACATCGTGTCAATTGTGCCCTTT   | 899  |
| JN189865.2  | TTCACCGTTGATCAATTCAAGATGGGTGAGCATCGTAACATCGTGTCAATTGTGCCCTTT   | 900  |
| MF144242.1  | TTCACCGTTGATCAATTCAAGATCGGTGAGCATCGTAACATCGTCTCGATTGTGCCCTTT   | 900  |
| AF319555.1  | TTCACCGTTGATCAATTCAAGATGGGTGAGCATCGTAACATCGTGTCAATTGTGCCCTTT   | 900  |
| FJ789783.1  | TTCACCGTTGATCAATTCAAGATGGGTGAGCATCGTAACATCGTGTGCGATTGTGCCCTTT  | 900  |
| NC_008040.1 | TTCACCGTTGATCAATTCAAGATGGGTGAGCATCGTAACATCGTGTGCGATTGTGCCCTTT  | 900  |
| EF558368.1  | TTCACCGTTGATCAATTCAAGATGGGTGAGCATCGTAACATCGTGTGCGATTGTGCCCTTT  | 900  |
| AY721616.1  | TTCACCGTTGATCAATTCAAGATGGGTGAGCATCGTAACATCGTGTGCGATTGTGCCCTTT  | 900  |
| KY354681.1  | TTCACCGTTCGATCAATTCAAGATGGGTGAGCATCGTAACATCGTGTGCGATTGTGCCCTTT | 897  |
| KP455643.1  | TTCACCGTTGATCAATTCAAGATGGGTGAGCATCGTAACATCGTCTCGATTGTGCCCTTT   | 900  |
| MN309751.1  | TTCACCGTTGATCAATTCAAGATGGGTGAGCATCGTAACATCGTCTCGATTGTGCCCTTT   | 900  |
|             | ***** ** ***** ** * **                                         |      |
| AY369136.1  | GCAACTTGCCGTTCAAACCTGCTCAAGATCAGTGAGTATGGTGCTGAGTTGGAGTACATG   | 960  |
| KY315688.1  | GCAACTTGCCGTTCAAACCTGCTCAAGATCAGTGAGTATGGTGCTGAGTTGGAGTACATG   | 951  |
| JN189909.2  | GCAACTTGCCGTTCAAACCTGCTCAAGATCAGTGAGTATGGTACTGAGTTGGAGTATATG   | 960  |
| MT157513.1  | GCAACTTGCCGTTCAAACCTGCTCAAGATCAGTGAGTATGGTGCTGAGTTGGAGTATATG   | 959  |
| JN189865.2  | GCAACTTGCCGTTCAAACCTGCTCAAGATCAGTGAGTACGGTGCTGAGTTGGAGTATATG   | 960  |
| MF144242.1  | GCAACTTGCCGTTCAAACCTGCTCAAGATCAGTGAGTACGGTGCTGAGTTGGAGTATATG   | 960  |
| AF319555.1  | GCAACTTGCCGTTCAAACCTGCTCAAGATCAGTGAGTATGGTGCTGAGTTGGAGTATATG   | 960  |
| FJ789783.1  | GCAACTTGCCGTTCAAACCTGCTCAAGATCAGTGAGTACGGTGCTGAGTTGGAGTATATG   | 960  |
| NC_008040.1 | GCAACTTGCCGTTCAAACCTGCTCAAGATCAGTGAGTACGGTGCTGAGTTGGAGTATATG   | 960  |
| EF558368.1  | GCAACTTGCCGTTCAAACCTGCTCAAGATCAGTGAGTACGGTGCTGAGTTGGAGTATATG   | 960  |
| AY721616.1  | GCAACTTGCCGTTCAAACCTGCTCAAGATCAGTGAGTACGGTGCTGAGTTGGAGTATATG   | 960  |
| KY354681.1  | GCAACTTGCCGTTCAAACCTGCTCAAGATCAGTGAGTACGGTGCTGAGTTGGAGTATATG   | 957  |
| KP455643.1  | GCAACTTGCCGTTCAAACCTGCTCAAGATCAGTGAGTACGGTGCTGAGTTGGAGTATATG   | 960  |
| MN309751.1  | GCAACTTGCCGTTCAAACCTGCTCAAGATCAGTGAGTACGGTGCTGAGTTGGAGTATATG   | 960  |
|             | ***** ** ***** ** ***** **                                     |      |
| AY369136.1  | CGCTACCAGCAGCGCAACAACATTGCCAACTTCAACGCAGTCACCTTACATCTCTGAGAAT  | 1020 |
| KY315688.1  | CGCTATCAACAGCGCAACAACATTGCCAACTTCAACGCAGTCACCTTACATCTCTGAGAAT  | 1011 |
| JN189909.2  | CGCTACCAACAGCGCAACAACATTGCCAACTTCAACGCAGTCACCTTACATCTCTGAGAAT  | 1020 |
| MT157513.1  | CGCTATCAACAGCGCAACAACATTGCCAACTTCAACGCAGTCACCTTATATCTCTGAGAAT  | 1019 |
| JN189865.2  | CGCTACCAGCAGCGCAACAACATTGCCAACTTCAACGCAGTCACCTTACATCTCTGAGAAT  | 1020 |
| MF144242.1  | CGCTACCAACAGCGCAACAACATTGCCAACTTCAACGCAGTCACCTTATATCTCTGAGAAT  | 1020 |
| AF319555.1  | CGCTACCAACAGCGCAACAACATTGCCAACTTCAACGCAGTCACCTTACATCTCTGAGAAT  | 1020 |
| FJ789783.1  | CGCTACCAACAGCGCAACAACATTGCCAACTTCAACGCAGTCACCTTACATCTCTGAGAAT  | 1020 |
| NC_008040.1 | CGCTACCAACAGCGCAACAACATTGCCAACTTCAACGCAGTCACCTTACATCTCTGAGAAT  | 1020 |
| EF558368.1  | CGCTACCAACAGCGCAACAACATTGCCAACTTCAACGCAGTCACCTTACATCTCTGAGAAT  | 1020 |
| AY721616.1  | CGCTATCAACAGCGCAACAACATTGCCAACTTCAACGCAGTCACCTTACATCTCTGAGAAT  | 1020 |
| KY354681.1  | CGCTACCAACAGCGCAACAACATTGCCAACTTCAACGCAGTCACCTTATATCTCTGAGAAT  | 1017 |
| KP455643.1  | CGCTACCAACAGCGCAACAACATTGCCAACTTCAACGCAGTCACCTTATATCTCTGAGAAT  | 1020 |
| MN309751.1  | CGCTACCAACAGCGCAACAACATTGCCAACTTCAACGCAGTCACCTTATATCTCTGAGAAT  | 1020 |
|             | ***** ** ***** ** ***** **                                     |      |
| AY369136.1  | GGGCCACTCATCAGTCTGGGTTTGAAGGCAATTTTGCAAGCGTCCAGCTTCCCCTGCAA    | 1080 |
| KY315688.1  | GGGCCACTCATCAGTCTGGGTTTGAAGGCAATTTTGCAAGCGTCCAGCTTCCCCTGCG     | 1071 |
| JN189909.2  | GGGCCGCTCATCAGTCTGGGTTTGAAGGCAATTTTGCAAGTGTCCAGCTTCCCCTGCG     | 1080 |
| MT157513.1  | GGGCCACTCATCAGTCTGGGTTTGAAGGCAATTTTGCAAGCGTCCAGCTTCCCTGCG      | 1079 |
| JN189865.2  | GGGCCACTCATCAGTCTGGGTTTGAAGGCAATTTTGCAAGCGTCCAGCTTCCCCTGCG     | 1080 |
| MF144242.1  | GGGCCCTCATCAGCTTGGGTTTGAAGGCAACTTTTGCAAGCGTCCAGCTTCCCCTGCG     | 1080 |
| AF319555.1  | GGGCCACTCATCAGTCTGGGTTTGAAGGCAATTTTGCAAGCGTCCAACTTCCCTGCG      | 1080 |
| FJ789783.1  | GGGCCACTTATCAGCTTGGGTTTGAAGGCAACTTTTGCAAGCGTCCAGCTTCCCCTGCG    | 1080 |
| NC_008040.1 | GGGCCACTCATCAGCTTGGGTTTGAAGGCAACTTTTGCAAGCGTCCAACTTCCCTTGCAG   | 1080 |
| EF558368.1  | GGGCCACTCATCAGCTTGGGTTTGAAGGCAACTTTTGCAAGCGTCCAGCTTCCCCTGCG    | 1080 |
| AY721616.1  | GGGCCCTCATCAGCTTGGGTTTGAAGGCAACTTTTGCAAGCGTCCAGCTTCCCCTGCG     | 1080 |
| KY354681.1  | GGGCCCTCATCAGCTTGGGTTTGAAGGCAACTTTTGCAAGTGTCCAGCTTCCCCTGCG     | 1077 |
| KP455643.1  | GGGCCCTCATCAGCTTGGGTTTGAAGGCAACTTTGCAAGCGTCCAGCTTCCCCTGCG      | 1080 |
| MN309751.1  | GGGCCCTCATCAGCTTGGGTTTGAAGGCAACTTTTGCAAGCGTCCAGCTTCCCCTGCG     | 1080 |
|             | ***** * ***** ***** ** ***** ***** *****                       |      |
| AY369136.1  | GATTTTCGAGAACATCCGCACTGCATACGAACTGTCCAAGACTAACAACCTTGTGAGACT   | 1140 |
| KY315688.1  | GATTTTCGAGAACATCCGCACTGCATACGAACTGTCCAAGACTAACAACCTTGTGAGACT   | 1131 |
| JN189909.2  | GATTTTCGAGAACATCCGCACTGCATACGAACTGTCCAAGACTAACAACCTTGTGAGACT   | 1140 |
| MT157513.1  | GATTTTCGAGAACATCCGCACTGCATACGAACTGTCCAAGACTAACAACCTTGTGAGACT   | 1139 |
| JN189865.2  | GATTTTCGAGAACATCCGCACTGCATACGAACTGTCCAAGACTAACAACCTTGTGAGACT   | 1140 |
| MF144242.1  | GATTTTCGAGAACATCCGCACTGCATACGAACTGTCCAAGACTAACAACCTTGTGAGACT   | 1140 |
| AF319555.1  | GATTTTCGAGAACATCCGCACTGCATACGAACTGTCCAAGACTAACAACCTTGTGAGACT   | 1140 |
| FJ789783.1  | GATTTTCGAGAACATCCGCACTGCATACGAACTGTCCAAGACTAACAACCTTGTGAGACT   | 1140 |
| NC_008040.1 | GATTTTCGAGAACATCCGCACTGCATACGAACTGTCCAAGACTAACAACCTTGTGAGACT   | 1140 |
| EF558368.1  | GATTTTCGAGAACATCCGCACTGCATACGAACTGTCCAAGACTAACAACCTTGTGAGACT   | 1140 |
| AY721616.1  | GATTTTCGAGAACATCCGCACTGCATACGAACTGTCCAAGACTAACAACCTTGTGAGACT   | 1140 |
| KY354681.1  | GATTTTCGAGAACATCCGCACTGCATACGAACTGTCCAAGACTAACAACCTTGTGAGACT   | 1137 |
| KP455643.1  | GATTTTCGAGAACATCCGCACTGCATACGAACTGTCCAAGACTAACAACCTTGTGAGACT   | 1140 |
| MN309751.1  | GATTTTCGAGAACATCCGCACTGCATACGAACTGTCCAAGACTAACAACCTTGTGAGACT   | 1140 |
|             | ***** ***** ***** ***** ***** ***** *****                      |      |

|             |                                                                |      |
|-------------|----------------------------------------------------------------|------|
| AY369136.1  | GTTTCGCCGGTCAGGGCGCCCCGTGCAAGGAGGCAGCTATCATACATAAGTGTCTCCAAGCC | 1200 |
| KY315688.1  | GTTTCGCCGGTCAGGGCGCCCCGTGCAAGGAGGCAGCTATCATACATAAGTGTCTCCAAGCC | 1191 |
| JN189909.2  | GTTTCGCCGGTCAGGACGCCCGTGCAAGGAGGCAGCTATCATCCACAAATGTCTCCAAGCT  | 1200 |
| MT157513.1  | GTTTCGCCGGTCAGGGCGCCCCGTGCAAGGAGGCAGCTATCATCCATAAATGTCTCCAAGCC | 1199 |
| JN189865.2  | GTTTCGCCGGTCAGGGCGCCCCGTGCAAGGAGGCAGCTATCATCCATAAATGTCTCCAAGCC | 1200 |
| MF144242.1  | GTTTCGCCGGTCAGGGCGCCCCGTGCAAGGAGGCAGCTATCATCCATAAATGTCTCCAAGCC | 1200 |
| AF319555.1  | GTTTCGCCGGTCAGGGCGCCCCGTGCAAGGAGGCAGCTATCATCCATAAATGTCTCCAAGCC | 1200 |
| FJ789783.1  | GTTTCGCCGGTCAGGGCGCCCCGTGCAAGGAGGCAGCTATCATCCATAAATGTCTCCAAGCC | 1200 |
| NC_008040.1 | GTTTCGCCGGTCAGGGCGCCCCGTGCAAGGAGGCAGCTATCATCCATAAATGTCTCCAAGCC | 1200 |
| EF558368.1  | GTTTCGCCGGTCAGGGCGCCCCGTGCAAGGAGGCAGCTATCATCCATAAATGTCTCCAAGCC | 1200 |
| AY721616.1  | GTTTCGCCGGTCAGGGCGCCCCGTGCAAGGAGGCAGCTATCATCCACAAATGTCTCCAAGCC | 1200 |
| KY354681.1  | GTTTCGCCGGTCAGGGCGCCCCGTGCAAGGAGGCAGCTATCATCCATAAATGTCTCCAAGCC | 1197 |
| KP455643.1  | GTTTCGCCGGTCAGGGCGCCCCGTGCAAGGAGGCAGCTATCATCCATAAATGTCTCCAAGCC | 1200 |
| MN309751.1  | GTTTCGCCGGTCAGGGCGCCCCGTGCAAGGAGGCAGCTATCATCCATAAATGTCTCCAAGCC | 1200 |
| *****       |                                                                |      |
| AY369136.1  | GAGTGTGCCGTCGTCAGCGAGGTCGTGCATAAACTGGCGATCTCGCTCGCCATTACCAA    | 1260 |
| KY315688.1  | GAGTGTGCCGTCGTCAGCGAGGTCGTGCATAAACTGGCGATCTCGCTCGCCATTACCAA    | 1251 |
| JN189909.2  | GAGTGTGTGTCGTCAGCGAGGTCGTACATAAACTGGCGATCTTGCTCGTCATTACCAA     | 1260 |
| MT157513.1  | GAGTGTGCCGTCGTCAGCGAGGTCGTGCATAAACCCGGCGATCTCGCTCGTCATTACCAA   | 1259 |
| JN189865.2  | GAGTGTGCCGTCGTCAGCGAGGTCGTGCATAAACTGGCGATCTTGCTCGTCATTACCAA    | 1260 |
| MF144242.1  | GAGTGTGCCGTCGTCAGCGAGGTCGTGCATAAACTGGCGATCTTGCTCGTCATTACCAA    | 1260 |
| AF319555.1  | GAGTGTGCCGTCGTCAGCGAGGTCGTGCATAAACTGGCGATCTTGCTCGTCATTACCAA    | 1260 |
| FJ789783.1  | GAGTGTGCCGTCGTCAGCGAGGTCGTGCATAAACTGGCGATCTTGCTCGTCATTACCAA    | 1260 |
| NC_008040.1 | GAGTGTGCCGTCGTCAGCGAGGTCGTGCATAAACTGGCGATCTTGCTCGTCATTACCAA    | 1260 |
| EF558368.1  | GAGTGTGCCGTCGTCAGCGAGGTCGTGCATAAACTGGCGATCTTGCTCGTCATTACCAA    | 1260 |
| AY721616.1  | GAGTGTGCCGTCGTCAGCGAGGTCGTGCATAAACTGGCGATCTTGCTCGTCATTACCAA    | 1260 |
| KY354681.1  | GAGTGTGCCGTCGTCAGCGAGGTCGTGCATAAACTGGCGATCTTGCTCGTCATTACCAA    | 1257 |
| KP455643.1  | GAGTGTGCCGTCGTCAGCGAGGTCGTGCATAAACTGGCGATCTTGCTCGTCATTACCAA    | 1260 |
| MN309751.1  | GAGTGTGCCGTCGTCAGCGAGGTCGTGCATAAACTGGCGATCTTGCTCGTCATTACCAA    | 1260 |
| *****       |                                                                |      |
| AY369136.1  | GCAGTTGGTAGTGCTACGACACTGATCCGGCCGAGCAGGGCAAGTGTATGCTCGTGAG     | 1320 |
| KY315688.1  | GCAGTTGGTAGTGCTACGACACTGATCCGGCCGAGCAGGGCAAGTGTATGCTCGTGAG     | 1311 |
| JN189909.2  | GCAGTTGGTAGTGCTACGACACTGATCCGGCCGAGCAGGGCAAGTGTATGCTCGTGAG     | 1320 |
| MT157513.1  | GCAGTTGGTAGTGCTACGACACTGATCCGGCCGAGCAGGGCAAGTGTATGCTCGTGAG     | 1319 |
| JN189865.2  | GCTGTTGGTAGTGCTACGACACTGATCCAGCCGAGCAGGGCAAGTGTATGCTCGTGAG     | 1320 |
| MF144242.1  | GCAGTTGGTAGTGCTACGACACTGATCCAGCTGAGCAGGGCAAGTGTATGCTCGTGAG     | 1320 |
| AF319555.1  | GCAGTTGGTAGTGCTACGACACTGATCCAGCCGAGCAGGGCAAGTGTATGCTCGTGAG     | 1320 |
| FJ789783.1  | GCAGTTGGTAGTGCTACGACACTGATCCAGCTGAGCAGGGCAAGTGTATGCTCGTGAG     | 1320 |
| NC_008040.1 | GCAGTTGGTAGTGCTACGACACTGATCCAGCTGAGCAGGGCAAGTGTATGCTCGTGAG     | 1320 |
| EF558368.1  | GCAGTTGGTAGTGCTACGACACTGATCCAGCTGAGCAGGGCAAGTGTATGCTCGTGAG     | 1320 |
| AY721616.1  | GCAGTTGGTAGTGCTACGACACTGATCCAGCTGAGCAGGGCAAGTGTATGCTCGTGAG     | 1320 |
| KY354681.1  | GCAGTTGGTAGTGCTACGACACTGATCCAGCTGAGCAGGGCAAGTGTATGCTCGTGAG     | 1317 |
| KP455643.1  | GCAGTTGGTAGTGCTACGACACTGATCCAGCTGAGCAGGGCAAGTGTATGCTCGTGAG     | 1320 |
| MN309751.1  | GCAGTTGGTAGTGCTACGACACTGATCCAGCTGAGCAGGGCAAGTGTATGCTCGTGAG     | 1320 |
| *****       |                                                                |      |
| AY369136.1  | TATGCTCCTGGACCGTTGACTCAAACCTGCTGTATTTCCAAGTGAGTCACGTTCCAACGAG  | 1380 |
| KY315688.1  | TATGCTCCTGGACCGTTGACTCAAACCTGCTGTATTTCCAAGTGAGTCACGTTCCAACGAG  | 1371 |
| JN189909.2  | TATGCTCCTGGACCGTTGACTCAAACCTGCTGTATTTCCAAGTGAGTCACGTTCCAACGAG  | 1380 |
| MT157513.1  | TATGCTCCTGGACCGTTGACTCAAACCTGCTGTATTTCCAAGTGAGTCACGTTCCAACGAG  | 1379 |
| JN189865.2  | TATGCTCCTGGACCGTTGACTCAAACCTGCTGTATTTCCAAGTGAGTCACGTTCCAACGAG  | 1380 |
| MF144242.1  | TACGCTCCTGGACCGTTGACTCAAACCTGCTGTATTTCCAAGTGAGTCACGTTCCAACGAG  | 1380 |
| AF319555.1  | TATGCTCCTGGACCGTTGACTCAAACCTGCTGTATTTCCAAGTGAGTCACGTTCCAACGAG  | 1380 |
| FJ789783.1  | TATGCTCCTGGACCGTTGACTCAAACCTGCTGTATTTCCAAGTGAGTCACGTTCCAACGAG  | 1380 |
| NC_008040.1 | TATGCTCCTGGACCGTTGACTCAAACCTGCTGTATTTCCAAGTGAGTCACGTTCCAACGAG  | 1380 |
| EF558368.1  | TATGCTCCTGGACCGTTGACTCAAACCTGCTGTATTTCCAAGTGAGTCACGTTCCAACGAG  | 1380 |
| AY721616.1  | TACGCTCCTGGACCGTTGACTCAAACCTGCTGTATTTCCAAGTGAGTCACGTTCCAACGAG  | 1380 |
| KY354681.1  | TACGCTCCTGGACCGTTGACTCAAACCTGCTGTATTTCCAAGTGAGTCACGTTCCAACGAG  | 1377 |
| KP455643.1  | TACGCTCCTGGACCGTTGACTCAAACCTGCTGTATTTCCAAGTGAGTCACGTTCCAACGAG  | 1380 |
| MN309751.1  | TACGCTCCTGGACCGTTGACTCAAACCTGCTGTATTTCCAAGTGAGTCACGTTCCAACGAG  | 1380 |
| *****       |                                                                |      |
| AY369136.1  | CTTGCCACAATCGACGGTCGTATTGCTGGTCCGCAAGCCAAGGCAAAGAGCCGCGAGCAC   | 1440 |
| KY315688.1  | CTTGCCACAATCGACGGTCGTATTGCTGGTCCGCAAGCCAAGGCAAAGAGCCGCGAGCAC   | 1431 |
| JN189909.2  | CTTGCCACAATCGACGGTCGTATTGCTGGTCCGCAAGCTAAGGCAAAGAGCCGCGAGCAC   | 1440 |
| MT157513.1  | CTTGCCACGATTGACGGTCGTATTGCTGGTCCGCAAGCTAAGGCAAAGAGCCGCGAGCAC   | 1439 |
| JN189865.2  | CTTGCCACAATCGACGGTCGTATTGCTGGTCCGCAAGCCAAGGCAAAGAGCCGCGAGCAC   | 1440 |
| MF144242.1  | CTTGCCACAATCGACGGTCGTATTGCTGGTCCGCAAGCCAAGGCAAAGAGCCGCGAGCAC   | 1440 |
| AF319555.1  | CTTGCCACAATCGACGGTCGTATTGCTGGTCCGCAAGCCAAGGCAAAGAGCCGCGAGCAC   | 1440 |
| FJ789783.1  | CTTGCCACGATTGACGGTCGTATTGCTGGTCCGCAAGCCAAGGCAAAGAGCCGCGAGCAC   | 1440 |
| NC_008040.1 | CTTGCCACAATCGACGGTCGTATTGCTGGTCCGCAAGCCAAGGCAAAGAGCCGCGAGCAC   | 1440 |
| EF558368.1  | CTTGCCACAATCGACGGTCGTATTGCTGGTCCGCAAGCCAAGGCAAAGAGCCGCGAGCAC   | 1440 |
| AY721616.1  | CTTGCCACAATCGACGGTCGTATTGCTGGTCCGCAAGCCAAGGCAAAGAGCCGCGAGCAT   | 1440 |
| KY354681.1  | CTTGCCACAATCGACGGTCGTATTGCTGGTCCGCAAGCCAAGGCAAAGAGCCGCGAGCAC   | 1437 |

KP455643.1 CTTGCCACAATCGACGGTCGTATTGCTGGTCCGCAAGCCAAGGCAAAGAGCCGCGAGCAC 1440  
MN309751.1 CTTGCCACAATCGACGGTCGTATTGCTGGTCCGCAAGCCAAGGCAAAGAGCCGCGAGCAC 1440  
\*\*\*\*\* \*\* \*\*\*\*\* \*\*\*\*\* \*\*\*\*\* \*\*\*\*\* \*\*\*\*\* \*\*\*\*\*

AY369136.1 ATAACACCTAAGATGCGCAAAGTGGCTAGGGACTTCGTGCACCATTGGTGCCGGTTGCC 1500  
KY315688.1 ATAACACCTAAGATGCGCAAAGTGGCTAGGGACTTCGTGCACCATTGGTGCCGGTTGCC 1491  
JN189909.2 ATAACACCTAAGATGCGCAAAGTGGCTAGGGACTTCGTGCACCATTGGTGCCGGTTGCC 1500  
MT157513.1 ATAACACCTAAGATGCGCAAAGTGGCTAGGGATTTCGTGCACCATCTGGTGCCGATTGCC 1499  
JN189865.2 ATAACACCTAAAATGCGCAAAGTGGCTAGGGATTTCGTGCACCATTGGTGCCGGTTGCC 1500  
MF144242.1 ATAACACCTAAGATGCGCAAAGTGGCTAGGGACTTCGTGCACCATCTGGTGCCGATTGCC 1500  
AF319555.1 ATAACACCTAAGATGCGCAAAGTGGCTAGGGACTTCGTGCACCATCTGGTGCCGATTGCC 1500  
FJ789783.1 ATAACACCTAAGATGCGCAAAGTGGCTAGGGACTTCGTGCACCATCTGGTGCCGATTGCC 1500  
NC\_008040.1 ATAACACCTAAGATGCGCAAAGTGGCTAGGGACTTCGTGCACCATCTGGTGCCGATTGCC 1500  
EF558368.1 ATAACACCTAAGATGCGCAAAGTGGCTAGGGACTTCGTGCACCATCTGGTGCCGATTGCC 1500  
AY721616.1 ATAACACCTAAGATGCGCAAAGTGGCTAGGGACTTCGTGCACCATCTGGTGCCGATTGCC 1500  
KY354681.1 ATAACACCTAAGATGCGCAAAGTGGCTAGGGACTTCGTGCACCATCTGGTGCCGATTGCC 1497  
KP455643.1 ATAACACCTAAGATGCGCAAAGTGGCTAGGGACTTCGTGCACCATCTGGTGCCGATTGCC 1500  
MN309751.1 ATAACACCTAAGATGCGCAAAGTGGCTAGGGACTTCGTGCACCATCTGGTGCCGATTGCC 1500  
\*\*\*\*\* \*\*\*\*\* \*\*\*\*\* \*\*\*\*\* \*\*\*\*\* \*\*\*\*\* \*\*\*\*\*

AY369136.1 GGTACTGGCCGTCCCTACCCCTCACGTATGTCGAGGAGCAGCAGACCAAGCCGTTACAG 1560  
KY315688.1 GGTACTGGCCGTCCCTACCCCTCACGTATGTCGAGGAGCAGCAGACCAAGCCGTTACAG 1551  
JN189909.2 GGTACTGGCCGTCCCTACCCCTCACGTATGTCGAGGAGCAGCAGACCAAGCCGTTACAG 1560  
MT157513.1 GGTACTGGCCGTCCCTACCCCTCACGTATGTCGAGGAGCAGCAGACCAAGCCGTTACAG 1559  
JN189865.2 GGCACCTGGCCGTCCCTACCCCTCACGTATGTCGAGGAGCAGCAGACCAAGCCGTTACAG 1560  
MF144242.1 GGTACGGGCGGTCCCTACCCCTCACGTATGTCGAGGAGCAGCAGACCAAGCCGTTACAG 1560  
AF319555.1 GGCACCTGGCCGTCCCTACCCCTCACGTATGTCGAGGAGCAGCAGACCAAGCCGTTACAG 1560  
FJ789783.1 GGCACCTGGCCGTCCCTACCCCTCACGTATGTCGAGGAGCAGCAGACCAAGCCGTTACAG 1560  
NC\_008040.1 GGTACTGGCCGTCCCTACCCCTCACGTATGTCGAGGAGCAGCAGACCAAGCCGTTACAG 1560  
EF558368.1 GGCACCTGGCCGTCCCTACCCCTCACGTATGTCGAGGAGCAGCAGACCAAGCCGTTACAG 1560  
AY721616.1 GGCACCTGGCCGTCCCTACCCCTCACGTATGTCGAGGAGCAGCAGACCAAGCCGTTACAG 1560  
KY354681.1 GGTACTGGCCGTCCCTACCCCTCACGTATGTCGAGGAGCAGCAGACCAAGCCGTTACAG 1557  
KP455643.1 GGTACGGGCGGTCCCTACCCCTCACGTATGTCGAGGAGCAGCAGACCAAGCCGTTACAG 1560  
MN309751.1 GGTACGGGCGGTCCCTACCCCTCACGTATGTCGAGGAGCAGCAGACCAAGCCGTTACAG 1560  
\*\* \* \*\*\*\*\* \*\* \*\*\*\*\* \*\*\*\*\* \*\*\*\*\* \*\*\*\*\* \*\*\*\*\*

Conventional PCR/qPCR forward primer:CCGATATCACGATGAGTTCAC

AY369136.1 CGGGCTCGGAATGATGCTAAACCGATATCACGATGAGTTCACATATGATGGTCAAAGCGTTC 1620  
KY315688.1 CGGGCTCGGAATGATGCTAAACCGATATCACGATGAGTTCACATATGATGGTCAAAGCGTTC 1611  
JN189909.2 CGGGCTCGGAATGATGCTAAACCGATATCACGATGAGTTCACATATGATGGTCAAAGCGTTC 1620  
MT157513.1 CGGGCTCGGAATGATGCTAAACCGATATCACGATGAGTTCACATATGATGGTCAAAGCGTTC 1619  
JN189865.2 CGGGCTCGGAATGATGCTAAACCGATAACACGATGAGTTCACATATGATGGTCAAAGCGTTC 1620  
MF144242.1 CGGGCTCGGAATGATGCTAAACCGATATCACGATGAGTTCACATATGAAGGGCAAAGCGTTC 1620  
AF319555.1 CGGGCTCGGAATGATGCTAAACCGATATCACGATGAGTTCACATATGATGGTCAAAGCGTTC 1620  
FJ789783.1 CGGGCTCGGAATGATGCTAAACCGATATCACGATGAGTTCACATATGATGGTCAAAGCGTTC 1620  
NC\_008040.1 CGGGCTCGGAATGATGCTAAACCGATATCACGATGAGTTCACATATGATGGTCAAAGCGTTC 1620  
EF558368.1 CGGGCTCGGAATGATGCTAAACCGATATCACGATGAGTTCACATATGATGGTCAAAGCGTTC 1620  
AY721616.1 CGGGCTCGGAATGATGCTAAACCGATATCACGATGAGTTCACATATGATGGTCAAAGCGTTC 1620  
KY354681.1 CGGGCTCGGAATGATGCTAAACCGATATCACGATGAGTTCACATATGATGGTCAAAGCGTTC 1617  
KP455643.1 CGGGCTCGGAATGATGCTAAACCGATATCACGATGAGTTCACATATGATGGTCAAAGCGTTC 1620  
MN309751.1 CGGGCTCGGAATGATGCTAAACCGATATCACGATGAGTTCACATATGATGGTCAAAGCGTTC 1620  
\*\*\*\*\* \*\* \*\*\*\*\* \*\*\*\*\* \*\*\*\*\* \*\*\*\*\* \*\*\*\*\*

AY369136.1 CAAAAGAAAGAAGCATACAACGCCCCAAATTACCCAGGAACATCTCAACCGTTCCGCAC 1680  
KY315688.1 CAAAAGAAAGAAGCATACAACGCCCCAAATTACCCAGGAACATCTCAACCGTTCCACAC 1671  
JN189909.2 CAAAAGAAAGAAGCATACAACGCCCCAAATTATCCCAGGAACATTTCAACCGTTCCGCAC 1680  
MT157513.1 CAAAAGAAAGAAGCATACAACGCCCCAAATTATCCCAGGAACATTTCAACCGTTCCGCAT 1679  
JN189865.2 CAAAAGAAAGAAGCATACAACGCCCCAAATTACCCAGGAACATTTCAACCGTTCCGCAC 1680  
MF144242.1 CAAAAGAAAGAAGCATACAACGCCCCAAACTACCCAGGAACATTTCAACCGTTCCGCAC 1680  
AF319555.1 CAAAAGAAAGAAGCATACAACGCCCCAAATTATCCCAGGAACATTTCAACCGTTCCGCAT 1680  
FJ789783.1 CAAAAGAAAGAAGCATACAACGCCCCAAATTATCCCAGGAACATTTCAACCGTTCCGCAT 1680  
NC\_008040.1 CAAAAGAAAGAAGCATACAACGCCCCAAATTACCCAGGAACATTTCAACCGTTCCGCAT 1680  
EF558368.1 CAAAAGAAAGAAGCATACAACGCCCCAAATTATCCCAGGAACATTTCAACCGTTCCGCAT 1680  
AY721616.1 CAAAAGAAAGAAGCATACAACGCCCCAAATTACCCAGGAACATTTCAACTGTTCCGCAT 1680  
KY354681.1 CAAAAGAAAGAAGCATACAACGCCCCAAATTATCCCAGGAACATTTCAACCGTTCCGCAC 1677  
KP455643.1 CAAAAGAAAGAAGCATACAACGCCCCAAATTACCCAGGAACATTTCAACCGTTCCGCAT 1680  
MN309751.1 CAAAAGAAAGAAGCATACAACGCCCCAAATTATCCCAGGAACATCTCAACCGTTCCGCAT 1680  
\*\*\*\*\* \*\*\*\*\* \*\*\*\*\* \*\*\*\*\* \*\*\*\*\* \*\*\*\*\* \*\*\*\*\*

qPCR reverse primer:CCAGCTACACCTACGCTTTC

AY369136.1 ACCCAAACGTCAGTTGTCCAGCTACACCTACGCTTTCAAAGCCAGTGTTCTCCAGCAT 1740  
KY315688.1 ACCCAAACGTCAGTTGTCCAGCTACACCTACGCTTTCAAAGCCAGTGTTCTCCAGCAT 1731  
JN189909.2 ACCCAGAACGTCAGTTGTCCAGCTACACCTACGCTTTCAAAGCCAGTGTTCTCCAGCAT 1740  
MT157513.1 ACCCAGAACGTCAGTTGTCCAGCTACACCTACGCTTTCAAAGCCAGTGTTCTCCAGCAT 1739  
JN189865.2 ACCCAAACGTCAGTTGTCCAGCTACACCTACGCTTTCAAAGCCAGTGTTCTCCAGCAT 1740  
MF144242.1 ACCCAAACGTCAGTTGTCCAGCTACACCTACGCTTTCAAAGCCAGTGTTCTCCAGCAT 1740  
AF319555.1 ACCCAAACGTCAGTTGTCCAGCTACACCTACGCTTTCAAAGCCAGTGTTCTCCAGCAT 1740  
FJ789783.1 ACCCAAACGTCAGTTGTCCAGCTACACCTACGCTTTCAAAGCTAGTGTTCTCCAGCAT 1740  
NC\_008040.1 ACCCAAACGTCAGTTGTCCAGCTACACCTACGCTTTCAAAGCCAGTGTTCTCCAGCAT 1740

|             |                                                                |                       |      |
|-------------|----------------------------------------------------------------|-----------------------|------|
| EF558368.1  | ACCCAAAACGTTAAGTTGTCCAGCTACACCTATGCTTTC                        | AAAGCCAGTGTTCTCCAGCAT | 1740 |
| AY721616.1  | ACCCAAAACGTTCAAGTTGTCCAGCTACACCTACGCTTTC                       | AAAGCCAGTGTTCTCCAGCAT | 1740 |
| KY354681.1  | ACCCAAAACGTTCAAGTTGTCCAGCTACACCTACGCTTTC                       | AAAGCCAGTGTTCTCCAGCAT | 1737 |
| KP455643.1  | ACCCAGAACGTTCAAGTTGTCCAGCTACACCTACGCTTTC                       | AAAGCCAGTGTTCTCCAGCAT | 1740 |
| MN309751.1  | ACCCAAAACGTTCAAGTTGTCCAGCTACACCTACGCTTTC                       | AAAGCCAGTGTTCTCCAGCAT | 1740 |
|             | *****                                                          |                       |      |
| AY369136.1  | GTTCCGTGGTACATGCCAACGCACACACCAGCTGAAATTGCTGACGCAGTGCAAAAACCTTG |                       | 1800 |
| KY315688.1  | GTTCCGTGGTACATGCCAACGCACACACCAGCTGAAATTGCTGACGCAGTGCAAAAACCTTG |                       | 1791 |
| JN189909.2  | GTTCCGTGGTACATGCCAACGCACACACCAGCTGAAATCGCTGACGCAGTGCAAAAACCTTG |                       | 1800 |
| MT157513.1  | GTTCCGTGGTACATGCCAACGCACACACCAGCTGAAATTGCTGACGCAGTGCAAAAACCTTG |                       | 1799 |
| JN189865.2  | GTTCCGTGGTACATGCCAACGCACACACCAGCGGAAATCGCTGACGCAGTGCAAAAACCTTG |                       | 1800 |
| MF144242.1  | GTTCCGTGGTACATGCCAACGCACACACCAGCGGAAATCGCTGACGCAGTGCAAAAACCTTG |                       | 1800 |
| AF319555.1  | GTTCCGTGGTACATGCCAACGCACACACCAGCTGAAATCGCTGACGCAGTGCAAAAACCTTG |                       | 1800 |
| FJ789783.1  | GTTCCGTGGTACATGCCAACGCACACACCAGCTCAAATCGCTGACGCAGTGCAAAAACCTTG |                       | 1800 |
| NC_008040.1 | GTTCCGTGGTACATGCCAACGCACACACCAGCTGAAATCGCTGACGCAGTGCAAAAACCTTG |                       | 1800 |
| EF558368.1  | GTTCCGTGGTACATGCCAACGCACACACCAGCTGAAATCGCTGACGCAGTGCAAAAACCTTG |                       | 1800 |
| AY721616.1  | GTTCCGTGGTACATGCCAACGCACACACCAGCTGAAATCGCTGACGCAGTGCAAAAACCTTG |                       | 1800 |
| KY354681.1  | GTTCCGTGGTACATGCCAACGCACACACCAGCTGAAATCGCTGACGCAGTGCAAAAACCTTG |                       | 1797 |
| KP455643.1  | GTTCCGTGGTACATGCCAACGCACACACCAGCTGAAATTGCTGACGCAGTGCAAAAATTTG  |                       | 1800 |
| MN309751.1  | GTTCCGTGGTACATGCCAACGCACACACCAGCTGAAATTGCTGACGCAGTGCAAAAACCTTG |                       | 1800 |
|             | *****                                                          |                       |      |
| AY369136.1  | GCCGCAAGTTCCTACTGAGCTGGTTGAAACTGACTACAGCAAGTTCGATGGCACATTCTTG  |                       | 1860 |
| KY315688.1  | GCCGCAAGTTCCTACTGAGCTGGTTGAAACTGACTACAGCAAGTTCGATGGCACATTCTTG  |                       | 1851 |
| JN189909.2  | GCCGCAAGTTCCTACTGAGCTGGTCGAAACTGACTACAGCAAGTTCGATGGCACATTTTCTG |                       | 1860 |
| MT157513.1  | GCTGCAAGTTCCTACTGAGCTGGTTGAAACTGACTACAGCAAGTTCGATGGCACATTCTTG  |                       | 1859 |
| JN189865.2  | GCCGCAAGTTCCTACTGAGCTGGTTGAAACTGACTACAGCAAGTTCGATGGCACATTCTTG  |                       | 1860 |
| MF144242.1  | GCCGCAAGTTCCTACTGAGCTGGTCGAAACTGACTACAGCAAGTTCGATGGCACATTCTTG  |                       | 1860 |
| AF319555.1  | GCTGCAAGTTCCTACTGAGCTGGTTGAAACCGACTACAGCAAGTTCGATGGCACATTCTTG  |                       | 1860 |
| FJ789783.1  | GCCGCAAGTTCCTACTGAGCTGGTTGAAACTGACTACAGCAAGTTCGATGGCACATTCTTG  |                       | 1860 |
| NC_008040.1 | GCCGCAAGTTCCTACTGAGCTGGTTGAAACTGACTACAGCAAGTTCGATGGCACATTCTTG  |                       | 1860 |
| EF558368.1  | GCCGCAAGTTCCTACTGAGCTGGTTGAGACTGACTACAGCAAGTTCGATGGCACATTCTTG  |                       | 1860 |
| AY721616.1  | GCCGCAAGTTCCTACTGAGCTGGTTGAAACTGACTACAGCAAGTTCGATGGCACATTCTTG  |                       | 1860 |
| KY354681.1  | GCCGCAAGTTCCTACTGAGCTGGTTGAAACTGACTACAGCAAGTTCGATGGCACATTCTTG  |                       | 1857 |
| KP455643.1  | GCCGCAAGTTCCTACTGAGCTGGTTGAAACTGACTACAGCAAGTTCGATGGCACATTCTTG  |                       | 1860 |
| MN309751.1  | GCCGCAAGTTCCTACTGAGCTGGTTGAAACTGACTACAGCAAGTTCGATGGCACATTCTTG  |                       | 1860 |
|             | ** *****                                                       |                       |      |
| AY369136.1  | CGCTTTATGCGTGAGTGCGTCGAGTTTGCTATTTATAAGCGCTGGGTTACCTGGACCAC    |                       | 1920 |
| KY315688.1  | CGCTTCATGCGTGAGTGCGTCGAATTTGCTATTTATAAGCGCTGGGTTACCTGGACCAC    |                       | 1911 |
| JN189909.2  | CGCTTTATGCGTGAGTGCGTCGAATTTGCCATCTATAAGCGCTGGGTTACCTGGACCAC    |                       | 1920 |
| MT157513.1  | CGCTTCATGCGTGAGTGCGTCGAGTTTGCGATCTATAAGCGCTGGGTTACCTGGACCAC    |                       | 1919 |
| JN189865.2  | CGCTTTATGCGTGAGTGCGTCGAATTTGCCATCTATAAGCGCTGGGTTACCTGGACCAC    |                       | 1920 |
| MF144242.1  | CGCTTCATGCGTGAGTGCGTCGAATTTGCCATTTATAAGCGCTGGGTTCCACCTGGACCAC  |                       | 1920 |
| AF319555.1  | CGCTTTATGCGTGAGTGCGTCGAATTTGCTATCTATAAGCGCTGGGTTACCTGGACCAC    |                       | 1920 |
| FJ789783.1  | CGCTTTATGCGTGAGTGCGTTGAATTTGCTATCTATAAGCGCTGGGTTACCTGGACCAC    |                       | 1920 |
| NC_008040.1 | CGCTTCATGCGTGAGTGCGTCGAATTTGCTATCTATAAGCGCTGGGTTACCTGGACCAC    |                       | 1920 |
| EF558368.1  | CGCTTCATGCGTGAGTGCGTCGAATTTGCTATCTATAAGCGCTGGGTTACCTGGACCAC    |                       | 1920 |
| AY721616.1  | CGCTTCATGCGTGAGTGCGTCGAATTTGCTATCTATAAGCGCTGGGTTACCTGGACCAC    |                       | 1920 |
| KY354681.1  | CGCTTTATGCGTGAGTGCGTTGAATTTGCTATCTATAAGCGCTGGGTTACCTGGACCAC    |                       | 1917 |
| KP455643.1  | CGCTTTATGCGTGAGTGCGTCGAATTTGCCATCTATAAGCGCTGGGTTACCTGGACCAC    |                       | 1920 |
| MN309751.1  | CGCTTTATGCGTGAGTGCGTCGAATTTGCTATTTATAAGCGCTGGGTTACCTGGACCAC    |                       | 1920 |
|             | *****                                                          |                       |      |
| AY369136.1  | TTGCCAGAATTAACAACCTTTATTGGCTAATGAGATCCAAGCACCTGCTGTTACCCGATTG  |                       | 1980 |
| KY315688.1  | TTGCCGGAGTTAACAACCTTTATTGGCTAATGAGATCCAAGCACCTGCTGTTACCCGACTG  |                       | 1971 |
| JN189909.2  | TTGCCAGAGTTAACAACCTTTATTGGCTAATGAGATCCAAGCACCTGCTGTTACACGATTG  |                       | 1980 |
| MT157513.1  | TTGCCAGAATTAACAACCTTTATTGGCTAATGAGATCCAAGCACCTGCTGTTACACGATTG  |                       | 1979 |
| JN189865.2  | TTGCCAGAGTTAACAACCTTTATTGGCTAATGAGATCCAAGCACCTGCTGTTACACGACTG  |                       | 1980 |
| MF144242.1  | TTGCCGGAGTTAACAACCTTTATTGGCTAATGAGATCCAAGCACCTGCTGTTACACGACTG  |                       | 1980 |
| AF319555.1  | TTGCCAGAGTTAACAACCTTTATTGGCTAATGAGATCCAAGCACCTGCTGTTACACGACTG  |                       | 1980 |
| FJ789783.1  | TTGCCAGAGTTAACAACCTTTATTGGCTAATGAGATCCAAGCACCTGCTGTTACACGATTG  |                       | 1980 |
| NC_008040.1 | TTGCCAGAGTTAACAACCTTTATTGGCTAATGAGATCCAAGCACCTGCTGTTACACGATTG  |                       | 1980 |
| EF558368.1  | TTGCCAGAATTAACAACCTTTATTGGCTAATGAGATCCAAGCACCTGCTGTTACACGATTG  |                       | 1980 |
| AY721616.1  | TTGCCAGAGTTAACAACCTTTATTGGCTAATGAGATCCAAGCACCTGCTGTTACACGATTG  |                       | 1980 |
| KY354681.1  | TTGCCAGAGTTAACAACCTTTATTGGCTAATGAGATCCAAGCACCTGCTGTTACACGATTG  |                       | 1977 |
| KP455643.1  | TTGCCAGAGTTAACAACCTTTATTGGCTAATGAGATCCAAGCACCTGCTGTTACACGATTG  |                       | 1980 |
| MN309751.1  | TTGCCAGAGTTAACAACCTTTATTGGCTAATGAGATCCAAGCACCTGCTGTTACACGATTG  |                       | 1980 |
|             | *****                                                          |                       |      |
| AY369136.1  | GGCATTAATATGACCTGATTGCAGTCGCCTCAGCGGTTCTGCTCTCACGACAGACGGA     |                       | 2040 |
| KY315688.1  | GGCATCAAATACGACCTGATTGCAGCCGCCTCAGCGGTTCTGCTCTCACACAGACGGA     |                       | 2031 |
| JN189909.2  | GGCATCAAGTATGACCTGACTGCAGTCGCCTTAGTGGTTCTGCTCTCACTACAGACGGA    |                       | 2040 |
| MT157513.1  | GGCATCAAGTATGATCCTGATTGCAGCCGCCTCAGTGGTCTGCTCTCACGACCGACGGA    |                       | 2039 |
| JN189865.2  | GGCATCAAGTATGATCCTGATTGCAGTCGCCTCAGTGGTCTGCTCTCACGACAGACGGA    |                       | 2040 |
| MF144242.1  | GGCATCAAGTATGATCCTGATTGCAGTCGCCTCAGTGGTCTGCTCTCACGACAGACGGA    |                       | 2040 |

|             |                                                               |      |
|-------------|---------------------------------------------------------------|------|
| AF319555.1  | GGCATCAAGTATGACCCTGATTGCAGTCGCCTCAGTGGTTCTGCTCTCACAAACGACGGA  | 2040 |
| FJ789783.1  | GGCATCAAGTATGACCCTGATTGCAGCCGCTCAGCGGTTCTGCTCTCACGACGACGGA    | 2040 |
| NC_008040.1 | GGCATCAAGTATGACCCTGATTGCAGTCGCCTCAGTGGTTCTGCTCTCACGACAGACGGA  | 2040 |
| EF558368.1  | GGCATCAAGTATGAACCTGATTGCAGTCGCCTCAGTGGTTCTGCTCTCACGACAGACGGA  | 2040 |
| AY721616.1  | GGCATTAAGTATGACCCTGATTGCAGTCGCCTCAGTGGTTCTGCTCTCACAAACAGACGGA | 2040 |
| KY354681.1  | GGCATCAAGTATGACCCTGATTGCAGTCGCCTCAGTGGTTCTGCACTCACGACAGACGGA  | 2037 |
| KP455643.1  | GGCATCAAGTATGACCCTGATTGCAGTCGCCTCAGCGGCTCTGCTCTCACAAACAGACGGA | 2040 |
| MN309751.1  | GGCATCAAGTATGACCCTGATTGCAGTCGCCTCAGTGGCTCTGCTCTCACAAACAGACGGA | 2040 |
|             | ***** ** ** ** ***** ***** ***** ** ** ***** ***** ** *****   |      |
| AY369136.1  | AACAGCATTGCCAATGCTTTCGTCTCATACCTTGCTGGTCGTATGGCTGGCATGGATGAT  | 2100 |
| KY315688.1  | AACAGCATTGCCAATGCATTCGTCTCGTACCTTGCTGGTCGCATGGCTGGCATGGATGAT  | 2091 |
| JN189909.2  | AACAGCATTGCCAATGCTTTCGTCTCATACCTTGCTGGTCGTATGGCTGGCATGGATGAT  | 2100 |
| MT157513.1  | AACAGCATTGCCAATGCATTCGTCTCGTACCTTGCTGGTCGCATGGCTGGTATGGATGAC  | 2099 |
| JN189865.2  | AACAGCATTGCCAATGCTTTCGTCTCATACCTTGCTGGTCGCATGGCTGGCATGGATGAT  | 2100 |
| MF144242.1  | AACAGCATTGCCAATGCTTTCGTCTCATACCTTGCCGGTCGCATGGCTGGCATGGATGAT  | 2100 |
| AF319555.1  | AACAGCATTGCTAATGCTTTCGTCTCATACCTTGCTGGTCGCATGGCTGGCATGGATGAT  | 2100 |
| FJ789783.1  | AACAGCATTGCCAATGCTTTCGTCTCATACCTTGCTGGTCGCATGGCTGGCATGGATGAT  | 2100 |
| NC_008040.1 | AACAGCATTGCCAACGCTTTCGTCTCATACCTTGCTGGTCGCATGGCTGGCATGGATGAT  | 2100 |
| EF558368.1  | AACAGCATTGCCAATGCTTTCGTCTCATACCTTGCTGGTCGCATGGCTGGCATGGATGAT  | 2100 |
| AY721616.1  | AACAGCATTGCCAATGCTTTCGTCTCATACCTTGCTGGTCGCATGGCTGGCATGGATGAC  | 2100 |
| KY354681.1  | AACAGCATTGCCAATGCTTTCGTCTCATACCTTGCTGGTCGCATGGCTGGCATGGATGAC  | 2097 |
| KP455643.1  | AACAGCATTGCCAATGCTTTCGTCTCATACCTTGCTGGTCGTATGGCTGGCATGGATGAC  | 2100 |
| MN309751.1  | AACAGCATTGCCAATGCTTTCGTCTCATACCTTGCTGGTCGTATGGCTGGCATGGATGAC  | 2100 |
|             | ***** ** ** ***** ***** ***** ***** ***** ***** *****         |      |
| AY369136.1  | GACGAAGCTTGGTCTTGGATCGGCATTGTATACGGTGATGACGGGCTCAGATCTGGTAAT  | 2160 |
| KY315688.1  | GACGAAGCTTGGTCTTGGATCGGCATTGTATACGGTGATGATGGGCTCAGATCTGGTAAC  | 2151 |
| JN189909.2  | GATGAAGCTTGGTCTTGGATCGGCATTGTGTACGGTGATGATGGGCTCCGATCTGGTAAT  | 2160 |
| MT157513.1  | GATGAAGCTTGGTCTTGGATCGGCATTGTGTACGGTGATGACGGGCTCCGATCTGGTAAT  | 2159 |
| JN189865.2  | GATGAAGCTTGGTCTTGGATCGGCATTGTGTACGGTGATGATGGGCTCCGATCTGGTAAT  | 2160 |
| MF144242.1  | GATGAAGCTTGGTCTTGGATCGGCATTGTGTACGGTGATGATGGGCTCCGATCTGGTAAT  | 2160 |
| AF319555.1  | GATGAAGCTTGGTCTTGGATCGGCATTGTGTACGGTGATGATGGGCTCCGATCTGGTAAT  | 2160 |
| FJ789783.1  | GATGAAGCTTGGTCTTGGATCGGCATTGTGTACGGTGATGATGGGCTCCGATCTGGTAAT  | 2160 |
| NC_008040.1 | GATGAAGCTTGGTCTTGGATCGGCATTGTGTACGGTGATGATGGGCTCCGATCTGGTAAT  | 2160 |
| EF558368.1  | GATGAAGCTTGGTCTTGGATCGGCATTGTGTACGGTGATGATGGGCTCCGATCTGGTAAT  | 2160 |
| AY721616.1  | GATGAAGCTTGGTCTTGGATCGGCATTGTGTACGGTGATGACGGGCTCCGATCTGGTAAT  | 2160 |
| KY354681.1  | GATGAAGCTTGGTCTTGGATCGGCATTGTGTACGGTGATGATGGGCTCCGATCTGGTAAT  | 2157 |
| KP455643.1  | GATGAGGCTTGGTCTTGGATCGGCATTGTGTACGGTGATGATGGGCTCCGATCTGGTAAT  | 2160 |
| MN309751.1  | GATGAGGCTTGGTCTTGGATCGGCATTGTGTACGGTGATGACGGGCTCCGATCTGGTAAT  | 2160 |
|             | ** ** ***** ***** ***** ***** ***** ***** *****               |      |
| AY369136.1  | GTTTCAAATGAGCTCCTCACCAACACTGCTTCTCCCTTGGCTTTGACTTGAAGATAGTG   | 2220 |
| KY315688.1  | GTTTCAAATGAGCTCCTCACCAACACTGCTTCTCCCTTGGCTTTGACTTGAAGATAGTG   | 2211 |
| JN189909.2  | GTTTCAAATGAGCTCCTCACCAACACTGCTTCTCCCTCGGCTTTGACTTGAAGATCGTG   | 2220 |
| MT157513.1  | GTTTCAAATGAGCTCCTCACCAACACTGCTTCTCCCTTGGCTTTGACTTGAAGATTGTG   | 2219 |
| JN189865.2  | GTTTCAAATGAGCTCCTCACCAACACTGCTTCTCCCTCGGCTTTGACTTGAAGATAGTG   | 2220 |
| MF144242.1  | GTTTCAAATGAGCTCCTCACCAACACTGCTTCTCCCTCGGCTTTGACTTGAAGATAGTG   | 2220 |
| AF319555.1  | GTTTCAAACGAGCTCCTCACCAACACTGCTTCTCCCTCGGCTTTGACTTGAAGATAGTG   | 2220 |
| FJ789783.1  | GTTTCAAACGAGCTCCTCACCAACACTGCTTCTCCCTCGGCTTTGACTTGAAGATAGTG   | 2220 |
| NC_008040.1 | GTTTCAAATGAGCTCCTCACCAACACTGCTTCTCCCTCGGCTTTGACTTGAAGATAGTG   | 2220 |
| EF558368.1  | GTTTCAAATGAGCTCCTCACCAACACTGCTTCTCCCTCGGCTTTGACTTGAAGATAGTG   | 2220 |
| AY721616.1  | GTTTCAAATGAGCTCCTCACCAACACTGCTTCTCCCTCGGCTTTGACTTGAAGATAGTG   | 2220 |
| KY354681.1  | GTTTCAAATGAGCTCCTCACCAACACTGCTTCTCCCTCGGCTTTGACTTGAAGATAGTG   | 2217 |
| KP455643.1  | GTTTCAAATGAGCTCCTCACCAACACTGCTTCTCCCTCGGCTTTGACTTGAAGATAGTG   | 2220 |
| MN309751.1  | ATTTCAAATGAGCTCCTCACCAACACTGCTTCTCCCTCGGCTTTGACTTGAAGATAGTG   | 2220 |
|             | ***** ***** ***** ***** ***** ***** *****                     |      |
| AY369136.1  | AACCGCGCGCCACGTGGCTCCCCAGTGACATTCTGTCTCGAGTATACCTCGATCCTTGG   | 2280 |
| KY315688.1  | AACCGCGCGCCACGTGGCTCCCCAGTGACATTCTGTCTCGAGTATACCTCGATCCTTGG   | 2271 |
| JN189909.2  | AACCGCGCGCCACGTGGCTCTCCAGTGACATTCTGTCTCGAGTATACCTCGATCCTTGG   | 2280 |
| MT157513.1  | AATCGCGCACCCACGTGGCTCTCCAGTGACATTCTGTCTCGAGTATACCTCGATCCTTGG  | 2279 |
| JN189865.2  | AATCGCGCGCCACGTGGCTCTCCAGTGACATTCTGTCTCGAGTATACCTCGATCCTTGG   | 2280 |
| MF144242.1  | AATCGCGCGCCACGTGGCTCTCCAGTGACATTCTGTCTCGAGTATACCTCGATCCTTGG   | 2280 |
| AF319555.1  | AATCGCGCGCCACGTGGCTCTCCAGTGACATTCTGTCTCGAGTATACCTCGATCCTTGG   | 2280 |
| FJ789783.1  | AATCGCGCGCCACGTGGCTCTCCAGTGACATTCTGTCTCGAGTATACCTCGATCCTTGG   | 2280 |
| NC_008040.1 | AATCGCGCGCCACGTGGCTCTCCAGTGACATTCTGTCTCGAGTATACCTCGATCCTTGG   | 2280 |
| EF558368.1  | AATCGCGCGCCACGTGGCTCTCCAGTGACATTCTGTCTCGAGTATACCTCGATCCTTGG   | 2280 |
| AY721616.1  | AATCGCGCGCCACGTGGCTCTCCAGTGACATTCTGTCTCGAGTATACCTCGATCCTTGG   | 2280 |
| KY354681.1  | AATCGCGCGCCACGTGGCTCTCCAGTGACATTCTGTCTCGAGTATACCTCGATCCTTGG   | 2277 |
| KP455643.1  | AATCGCGCGCCACGTGGCTCTCCAGTGACATTCTGTCTCGAGTATACCTCGATCCTTGG   | 2280 |
| MN309751.1  | AATCGCGCGCCACGTGGCTCTCCAGTGACATTCTGTCTCGAGTATACCTCGATCCTTGG   | 2280 |
|             | ** ***** ** ** ***** ** ***** ***** ***** ***** *****         |      |
| AY369136.1  | TCCTCACCGGCTTCCGTGCAGTCGCCATTAAAGAACATTGTTGAAATTGCATACCACCTGT | 2340 |
| KY315688.1  | TCCTCACCGGCTCCGTGCAGTCGCCATTAAAGAACATTGTTGAAATTGCATACCACCTGT  | 2331 |
| JN189909.2  | TCCTCACCGGCTTCCGTGCAGTCGCCATTAAAGAACATTGTTGAAATTGCACACCACCTGT | 2340 |

MT157513.1 TCCTCACC GGCTTCCGTGCAGTCGCCATTAAGAACATTGTTGAAATTGCACACCACCTGT 2339  
JN189865.2 TCCTCACC GGCTTCCGTGCAGTCGCCATTAAGAACATTATTGAAATTGCACACCACCTGT 2340  
MF144242.1 TCCTCACC GGCTTCCGTGCAGTCGCCATTAAGAACATTATTGAAATTGCACACCACCTGT 2340  
AF319555.1 TCCTCACC GGCTTCCGTGCAGTCGCCATTAAGAACATTGTTGAAATTGCACACCACCTGT 2340  
FJ789783.1 TCCTCACC GGCTTCCGTGCAGTCGCCATTAAGAACATTGTTGAAATTGCACACCACCTGT 2340  
NC\_008040.1 TCCTCACC GGCTTCCGTGCAGTCGCCATTAAGAACATTGTTGAAATTGCACACCACCTGT 2340  
EF558368.1 TCCTCACC GGCTTCCGTGCAGTCGCCATTAAGAACATTGTTGAAATTGCACACCACCTGT 2340  
AY721616.1 TCCTCACC GGCTTCCGTGCAGTCGCCATTAAGAACATTGTTGAAATTGCACACCACCTGT 2340  
KY354681.1 TCCTCACC GGCTTCCGTGCAGTCGCCATTAAGAACATTGTTGAAATTGCACACCACCTGT 2337  
KP455643.1 TCCTCACC GGCTTCCGTGCAGTCGCCATTAAGAACATTGTTGAAATTGCACACCACCTGT 2340  
MN309751.1 TCCTCACC GGCTTCCGTGCAGTCGCCATTAAGAACATTGTTGAAATTGCACACCACCTGT 2340  
\*\*\*\*\*

Conventional PCR reverse primer: GACATTGGCTGGGCTAAG

AY369136.1 GACACCCAGTCAGAGATTGACGACATTGGCTGGGCTAAGACACAGGCGTATTTGGTCACT 2400  
KY315688.1 GACACCCAGTCAGAGATTGACGACATTGGCTGGGCTAAGACACAGGCGTATTTGGTCACT 2391  
JN189909.2 GACACCCAGTCAGAGATTGACGACATTGGCTGGGCTAAGACACAGGCGTATTTGGTCACT 2400  
MT157513.1 GATACCCAGTCAGAGATTGACGACATTGGCTGGGCTAAGACACAGGCGTATTTGGTCACT 2399  
JN189865.2 GATACCCAGTCAGAGATTGACGACATTGGCTGGGCTAAGACACAGGCGTATTTGGTCACT 2400  
MF144242.1 GATACCCAGTCAGAGATTGACGACATTGGCTGGGCTAAGACACAGGCGTATTTGGTCACT 2400  
AF319555.1 GATACCCAGTCAGAGATTGACGACATTGGCTGGGCTAAGACACAGGCGTATTTGGTCACT 2400  
FJ789783.1 GATACCCAGTCAGAGATTGACGACATTGGCTGGGCTAAGACACAGGCGTATTTGGTCACT 2400  
NC\_008040.1 GATACCCAGTCAGAGATTGACGACATTGGCTGGGCTAAGACACAGGCGTATTTGGTCACT 2400  
EF558368.1 GATACCCAGTCAGAGATTGACGACATTGGCTGGGCTAAGACACAGGCGTATTTGGTCACT 2400  
AY721616.1 GATACCCAGTCAGAGATTGACGACATTGGCTGGGCTAAGACACAGGCGTATTTGGTCACT 2400  
KY354681.1 GATACCCAGTCAGAGATTGACGACATTGGCTGGGCTAAGACACAGGCGTATTTGGTCACT 2397  
KP455643.1 GATACCCAGTCAGAGATTGACGACATTGGCTGGGCTAAGACACAGGCGTATTTGGTCACT 2400  
MN309751.1 GATACCCAGTCAGAGATTGACGACATTGGCTGGGCTAAGACACAGGCGTATTTGGTCACT 2400  
\*\*\*\*\*

AY369136.1 GATAGCAAGACACCTTTTATTGGTCATTGGTGCCGGGCTTATCAGAGAAATTGCACTGCA 2460  
KY315688.1 GATAGCAAGACACCTTTTATTGGTCATTGGTGCCGGGCTTATCAGAGAAATTGCACTGCA 2451  
JN189909.2 GATGGCAAGACACCTTTTATTGGTCATTGGTGCCGGGCTTATCAGAGAAATTGCACTGCA 2460  
MT157513.1 GATAGCAAGACACCTTTTATTGGTCATTGGTGCCGGGCTTATCAGAGAAATTGCACTGCA 2459  
JN189865.2 GATAGCAAGACACCTTTTATTGGTCATTGGTGCCGGGCTTATCAGAGAAATTGCACTGCA 2460  
MF144242.1 GATAGCAAGACACCTTTT-TGGTCATTGGTGCCGGGCTTATCAGAGAAATTCC-CTGCA 2458  
AF319555.1 GATAGCAAGACACCTTTTATTGGTCATTGGTGCCGGGCTTATCAGAGAAATTGCACTGCA 2460  
FJ789783.1 GATAGCAAGACACCTTTTATTGGTCATTGGTGCCGAGCTTATCAGAGAAATTGCACTGCA 2460  
NC\_008040.1 GATAGCAAGACACCTTTTATTGGTCATTGGTGCCGGGCTTATCAGAGAAATTGCACTGCA 2460  
EF558368.1 GATAGCAAGACACCTTTTATTGGTCATTGGTGCCGGGCTTATCAGAGAAATTGCACTGCA 2460  
AY721616.1 GATAGCAAGACACCTTTTATTGGTCATTGGTGCCGGGCTTATCAGAGAAATTGCACTGCA 2460  
KY354681.1 GATAGCAAGACACCTTTTATTGGTCATTGGTGCCGGGCTTATCAGAGAAATTGCACTGCA 2457  
KP455643.1 GATAGCAAGACACCTTTTATTGGTCATTGGTGCCGGGCTTATCAGAGAAATTGCACTGCA 2460  
MN309751.1 GATAGCAAGACACCTTTTATTGGTCATTGGTGCCGGGCTTATCAGAGAAATTGCACTGCA 2460  
\*\*\*\*\*

AY369136.1 CGTGTGGTCCAGTATGCAGACTACACTGACATTCCATTCTGGGTGAAGAATGACGACCAC 2520  
KY315688.1 CGTGTGGTCCAGTATGCAGACTACACTGATATCCATTCTGGGTGAAGAATGACGACCAC 2511  
JN189909.2 CGTGTGGTCCAGTATGCAGACTACACTGACATTCCATTCTGGGTGAAGAATGACGACCAC 2520  
MT157513.1 CGTGTGGTCCAGTATGCAGACTACCTGACATTCCATTCTGGGTGAAGAATGACGACCAC 2519  
JN189865.2 CGTGTGGTCCAGTATGCAGACTACACTGACATTCCATTCTGGGTGAAGAATGACGACCAC 2520  
MF144242.1 CGTGTGGTCCAGT-ATGCGACTACACTGACATTCCATTCTGGGTGAAGAATGACGACCAC 2517  
AF319555.1 CGTGTGGTCCAGTATGCAGACTACCTGACATTCCATTCTGGGTGAAGAATGACGACCAC 2520  
FJ789783.1 CGTGTGGTCCAGTATGCAGACTACACTGACATTCCATTCTGGGTGAAGAATGACGACCAC 2520  
NC\_008040.1 CGTGTAGTTCAGTATGCAGACTACACTGACATTCCATTCTGGGTGAAGAATGACGACCAC 2520  
EF558368.1 CGTGTGGTCCAGTATGCAGACTACACTGACATTCCATTCTGGGTGAAGAATGACGACCAC 2520  
AY721616.1 CGTGTGGTCCAGTATGCAGACTACACTGACATTCCATTCTGGGTGAAGAATGACGACCAC 2520  
KY354681.1 CGTGTGGTCCAGTATGCAGACTACACTGACATTCCATTCTGGGTGAAGAATGACGACCAC 2517  
KP455643.1 CGTGTGGTCCAGTATGCAGACTACACTGACATTCCATTCTGGGTGAAGAATGACGACCAC 2520  
MN309751.1 CGTGTGGTCCAGTATGCAGACTACACTGACATTCCATTCTGGGTGAAGAATGACGACCAC 2520  
\*\*\*\*\*

AY369136.1 GTTGGCAACTCGTGGCCGAGTCTGAATCCGATGACTGGAATGACATTGTAGCCAATGAG 2580  
KY315688.1 GTTGGCAACTCGTGGCCGAGTCTGAATCCGATGACTGGAACGACATTGTAGCCAATGAG 2571  
JN189909.2 GCTGGCAAGTCTGGCCGAGTCTGATCCGATGACTGGAATGACGTTGTAGCCAACGAG 2580  
MT157513.1 GTTGGCAACTCGTGGCCGAGTCTGAATCTGATGACTGGAATGACATTGTAGCCAACGAG 2579  
JN189865.2 GTTGGCAACTCGTGGCCGAGTCTGAATCCGATGACTGGAATGACGTTGTAGCCAACGAG 2580  
MF144242.1 GTTGGCAACTCGTGGCCGAGTCTGAATCCGATGACTGGAATGACGTTGTAGCCAACGAG 2577  
AF319555.1 GTTGGCAACTCGTGGCCGAGTCTGAATCCGATGACTGGAATGACATTGTAGCCAACGAG 2580  
FJ789783.1 GTTGGCAACTCGTGGCCGAGTCTGAATCCGATGACTGGAATGACGTTGTAGCCAACGAG 2580  
NC\_008040.1 GTCGGCAACTCGTGGCCGAGTCTGAATCCGATGACTGGAATGACGTTGTAGCCAACGAG 2580  
EF558368.1 GTTGGCAACTCGTGGCCGAGTCTGAATCTGATGACTGGAATGACGTTGTAGCCAACGAG 2580  
AY721616.1 GTTGGCAACTCGTGGCCGAGTCTGAATCCGATGACTGGAATGACGTTGTAGCCAACGAG 2580  
KY354681.1 GTTGGCAACTCGTGGCCGAGTCTGAATCCGATGACTGGAATGACGTTGTAGCCAACGAG 2577  
KP455643.1 GTTGGCAACTCGTGGCCGAGTCTGAATCCGATGACTGGAATGACGTTGTAGCCAACGAG 2580  
MN309751.1 GTTGGCAACTCGTGGCCGAGTCTGAATCCGATGACTGGAATGACGTTGTAGCCAACGAG 2580  
\*\*\*\*\*



|             |                                                               |      |
|-------------|---------------------------------------------------------------|------|
| AY369136.1  | CTTGGCGTCACCACCGCCGAGCTGTTGAAGCATCTTGCACTTCTAGATGCTTATACTGGT  | 2640 |
| KY315688.1  | CTTGGCGTCACCACCGCCGAGCTGTTGAAGCATCTTGCACTTCTAGATGCTTATACTGGT  | 2631 |
| JN189909.2  | CTTGGCGTCACCACCGCCGAGCTGTTGAAGCATCTTGCACTTCTGGATGCTTATGCTGGT  | 2640 |
| MT157513.1  | CTTGGCGTCACCACCGCTGAGCTGTTGAAGCATCTTGCACTTCTGGATGCTTATGCTGGT  | 2639 |
| JN189865.2  | CTTGGCGTCACCACCGCTGAGCTGTTGAAGCATCTTGCACTCCTGGATGCTTATACTGGT  | 2640 |
| MF144242.1  | CTTGGCGTCACCACCGCTGAGCTGTTGAAGCATCTTGCACTCCTGGATGCTTATACTGGT  | 2637 |
| AF319555.1  | CTTGGCGTCACCACCGCTGAGCTGTTGAAGCATCTTGCACTTCTGGATGCTTATGCTGGT  | 2640 |
| FJ789783.1  | CTTGGCGTCACCACCGCTGAGCTGTTGAAGCATCTTGCACTCCTGGATGCTTATACTGGT  | 2640 |
| NC_008040.1 | CTCGGCGTCACCACCGCTGAGCTGTTGAAGCATCTTGCACTTCTGGATGCTTATACTGGT  | 2640 |
| EF558368.1  | CTTGGCGTCACCACCGCTGAGCTGTTGAAGCATCTCGCACTTCTGGATGCTTATACTGGT  | 2640 |
| AY721616.1  | CTTGGCGTCACCACCGCTGAGCTGTTGAAGCATCTTGCACTTCTGGATGCTTATACTGGT  | 2640 |
| KY354681.1  | CTTGGCGTCACCACCGCTGAGCTGTTGAAGCATCTTGCACTTCTGGATGCTTATACTGGT  | 2637 |
| KP455643.1  | CTTGGCGTCACCACCGCTGAGCTGTTGAAGCATCTTGCACTTCTGGATGCTTATACTGGT  | 2640 |
| MN309751.1  | CTTGGCGTCACCACCGCTGAGCTGTTGAAGCATCTTGCACTTCTGGATGCTTATACTGGT  | 2640 |
|             | ** *****                                                      |      |
| AY369136.1  | CCCATTAATGGCCTCCACGCTCTGACGACATCAATCGATTTGGAACCAAAGATGCTCTGTC | 2700 |
| KY315688.1  | CCCATTAATGGCCTCCACGCTCTGACAACATCAATCGATTTGGAACCAAAGATGCTCTGTC | 2691 |
| JN189909.2  | CCCATCAGTGGCCTCCACGTTTGACAACATCAATCGATTTGGAACCAAAGATGCTCTGTC  | 2700 |
| MT157513.1  | CCCATCAGTGGCCTCCCGCTCTGACAACATCAATTGATTTGGAACCAAAGATGCTCTGTC  | 2699 |
| JN189865.2  | CCCATTAGTGGCCTCCACGCTCTGACAACATCAATCGATTTGGAACCAAAGATGCTCTGTC | 2700 |
| MF144242.1  | CCCATTAGTGGCCTCCACGCTCTGACAACATCAATCGATTTGGAACCAAAGATGCTCTGTC | 2697 |
| AF319555.1  | CCCATCAGTGGCCTCCACGCTCTGACAACATCAATCGATTTGGAACCAAAGATGCTCTGTC | 2700 |
| FJ789783.1  | CCCATCAGTGGCCTCCACGCTCTGACAACATCAATCGATTTGGAACCAAAGATGCTCTGTC | 2700 |
| NC_008040.1 | CCCATCAGTGGCCTCCACGCTCTGACAACATCAATCGATTTGGAACCAAAGATGCTCTGTC | 2700 |
| EF558368.1  | CCCATCAGTGGCCTCCACGCTCTGACAACATCAATCGATTTGGAACCAAAGATGCTCTGTC | 2700 |
| AY721616.1  | CCCATTAGTGGCCTCCACGCTCTGACAACATCAATCGATTTGGAACCAAAGATGCTCTGTC | 2700 |
| KY354681.1  | CCCATTAGTGGCCTCCACGCTCTGACAACATCAATCGATTTGGAACCAAAGATGCTCTGTC | 2697 |
| KP455643.1  | CCCATTAGCGGCTCCACGCTCTGACAACATCAATCGATTTGGAACCAAAGATGCTCTGTC  | 2700 |
| MN309751.1  | CCCATTAGCGGCTCCCGCTCTGACAACATCAATTGATTTGGAACCAAAGATGCTCTGTC   | 2700 |
|             | *****                                                         |      |
| AY369136.1  | GCATTAGACGGGGAGATCCAAGCCGGTCCTAGTCAAAACAAAAGTAGCAAGGATGGAACA  | 2760 |
| KY315688.1  | GCATTAGACGGGGAGATCCAAGCCGGTCCTAGTCAAAACAAACACTAGCAAGGATGGAACA | 2751 |
| JN189909.2  | GCATTAGACGGGGAGATCCAAGCCGGTCCTAGTCAAAACAAAAGTAGCAAGGATGGAACA  | 2760 |
| MT157513.1  | GCATTAGACGGGGAGATCCAAGCCGGTCCTAGTCAAAACAAAAGTAGCAAGGATGGAACA  | 2759 |
| JN189865.2  | GCATTAGACGGGGAGATCCAAGCCGGTCCTAGTCAAAACAAAAGTAGCAAGGATGGAACA  | 2760 |
| MF144242.1  | GCATTAGACGGGGAGATCCAAGCCGGTCCTAGTCAAAACAAAAGTAGCAAGGATGGAACA  | 2757 |
| AF319555.1  | GCATTAGATGGGGAGATCCAAGCCGGTCCTAGTCAAAACAAAAGTAGCAAGGATGGAACA  | 2760 |
| FJ789783.1  | GCATTAGACGGGGAGATCCAAGCCGGTCCTAGTCAAAACAAAAGTAGCAAGGATGGAACA  | 2760 |
| NC_008040.1 | GCATTGGACGGGGAGATCCAAGCCGGTCCTAGTCAAAACAAAAGTAGCAAGGATGGAACA  | 2760 |
| EF558368.1  | GCATTAGACGGGGAGATCCAAGCCGGTCCTAGTCAAAACAAAAGTAGTAAGGATGGAACA  | 2760 |
| AY721616.1  | GCATTAGACGGGGAGATCCAAGCCGGTCCTAGTCAAAACAAAAGTAGTAAGGATGGAACA  | 2760 |
| KY354681.1  | GCATTGGACGGGGAGATCCAAGCCGGTCCTAGTCAAAACAAAAGTAGTAAGGATGGAACA  | 2757 |
| KP455643.1  | GCATTAGACGGGGAGATCCAAGCCGGTCCTAGTCAAAACAAAAGTAGTAAGGATGGAACG  | 2760 |
| MN309751.1  | GCATTAGACGGGGAGATCCAAGCCGGTCCTAGTCAAAACAAAAGTAGTAAGGATGGAACA  | 2760 |
|             | *****                                                         |      |
| AY369136.1  | AATCCAACAAGCGATCGATCAGCACCTCGTCGAGCTCGAGCAGCTCTTCCAGGTGATGAT  | 2820 |
| KY315688.1  | AATCCAACAAGCGATCGATCAGCACCTCGTCGAGCTCGAGCAGCTCTTCCAGGTGATGAT  | 2811 |
| JN189909.2  | AATCCAACAAGCGATCGATCAGCACCTCGTCGAGCTCGAACAGCTCTTCCAGGTGATGAT  | 2820 |
| MT157513.1  | AATCCAACAAGCGATCGATCAGCACCTCGTCGAGCTCGAGCAGCTCTTCCAGGTGATGAT  | 2819 |
| JN189865.2  | AATCCAACAAGCGATCGATCAGCACCTCGTCGAGCTCGAGCAGCTCTTCCAGGTGATGAT  | 2820 |
| MF144242.1  | AATCCAACAAGCGATCGATCAGCACCTCGTCGAGCTCGAGCAGCTCTTCCAGGTGATGAT  | 2817 |
| AF319555.1  | AATCCAACAAGCGATCGATCAGCACCTCGTCGAGCTCGAGCAGCTCTTCCAGGTGATGAT  | 2820 |
| FJ789783.1  | AATCCAACAAGCGATCGATCAGCACCTCGTCGAGCTCGAGCAGCTCTTCCAGGTGATGAT  | 2820 |
| NC_008040.1 | AATCCAACAAGCGATCGATCAGCACCTCGTCGAGCTCGAGCAGCTCTTCCAGGTGATGAT  | 2820 |
| EF558368.1  | AATCCAACAAGCGATCGATCAGCACCTCGTCGAGCTCGAGCAGCTCTTCCAGGTGATGAT  | 2820 |
| AY721616.1  | AATCCAACAAGCGATCGATCAGCACCTCGTCGAGCTCGAGCAGCTCTTCCAGGTGATGAT  | 2820 |
| KY354681.1  | AATCCAACAAGCGATCGATCAGCACCTCGTCGAGCTCGAGCAGCTCTTCCAGGTGATGAT  | 2817 |
| KP455643.1  | AATCCAACAAGCGATCGATCAGCTCCTCGTCGAGCTCGAGCAGCTCTTCCAGGTGATGAT  | 2820 |
| MN309751.1  | AATCCAACAAGCGATCGATCAGCACCTCGTCGAGCTCGAGCAGCTCTTCCAGGTGATGAT  | 2820 |
|             | *****                                                         |      |
| AY369136.1  | GGACACGCGCTCGCTCTCGGCGGAGTGACCGCGATCCAGGTAAACGAGATGCGCACGTT   | 2880 |
| KY315688.1  | GGACACGCGCTCGCTCTCGGCGGAGTGACCGCGATCCAGGTAAACGAGATGCGCACGTT   | 2871 |
| JN189909.2  | GGACACGCGCTCGCTCTCGGCGGAGTGACCGCGATCCAGGTAAACGAGATGCGCACGTT   | 2880 |
| MT157513.1  | GGACACGCGCTCGCTCTCGGCGGAGTGACCGCGATCCAGGTAAACGAGATGCGCACGTT   | 2879 |
| JN189865.2  | GGACACGCGCTCGCTCTCGGCGGAGTGACCGCGATCCAGGTAAACGAGATGCGCACGTT   | 2880 |
| MF144242.1  | GGACACGCGCTCGCTCTCGGCGGAGTGACCGCGATCCAGGTAAACGAGATGCGCACGTT   | 2877 |
| AF319555.1  | GGACACGCGCTCGCTCTCGGCGGAGTGACCGCGATCCAGGTAAACGAGATGCGCACGTT   | 2880 |
| FJ789783.1  | GGACACGCGCTCGCTCTCGGCGGAGTGACCGCGATCCAGGTAAACGAGATGCGCACGTT   | 2880 |
| NC_008040.1 | GGACACGCGCTGCTCTCGGCGGAGTGACCGCGATCCAGGTAAACGAGATGCGCACGTT    | 2880 |
| EF558368.1  | GGACACGCGCTCGCTCTCGGCGGAGTGACCGCGATCCAGGTAAACGAGATGCGCACGTT   | 2880 |
| AY721616.1  | GGACACGCGCTCGCTCTCGGCGGAGTGACCGCGATCCAGGTAAACGAGATGCGCACGTT   | 2880 |
| KY354681.1  | GGACACGCGCTCGCTCTCGGCGGAGTGACCGCGATCCAGGTAAACGAGATGCGCACGTT   | 2877 |
| KP455643.1  | GGACACGCGCTCGCTCTCGGCGGAGTGACCGCGATCCAGGTAAACGAGATGCGCACGTT   | 2880 |

|             |                                                                              |      |
|-------------|------------------------------------------------------------------------------|------|
| MN309751.1  | GGACACGCGCGTCGCTCTCGGCGGAGTGACCGCGATCCAGGTAACAGAGATGCGTACGTT<br>*****        | 2880 |
| AY369136.1  | CGTGATAAGCGCTCAGCCCGCAGCTCGCCGCCTACACGTCTGTACGCCGGTTTCCGCC                   | 2940 |
| KY315688.1  | CGTGACAAGTGCTCAGCCCGCAGCTCGCCGCCTACACGTCTGTCTCGCCGGTTTCCGCC                  | 2931 |
| JN189909.2  | CGTGATAAGCGCCACGCCCGCAGCCCGTCGCTACACGTCTGTACGCCGGTTTCCGCC                    | 2940 |
| MT157513.1  | CGTGATAAGCGCCACGCCCGCAGCTCGCCGCCTGCACGTCTGTACGCCGGTTTCCGCC                   | 2939 |
| JN189865.2  | CGTGATAAGCGCCACGCCCGCAGCTCGCCGCCTGCACGTCTGTACGCCGGTTTCCACC                   | 2940 |
| MF144242.1  | CGTGATAAGCGCCACGCCCGCAGCTCGCCGCCTGCACGTCTGTACGCCGGTTTCCACC                   | 2937 |
| AF319555.1  | CGTGATAAGCGCCACGCCCGCAGCTCGCCGCCTACACGTCTGTACGCCGGTTTCCACC                   | 2940 |
| FJ789783.1  | CGTGATAAGCGCCACGCCCGCAGCTCGCCGCCTACACGTCTGTACGCCGGTTTCCACC                   | 2940 |
| NC_008040.1 | CGTGGTAAGCGCTCAGCCCGCAGCTCGCCGCCTGTACGTCTGTACGCCGGTTTCCACC                   | 2940 |
| EF558368.1  | CGTGATAAGCGCCACGCCCGGGCTCGCCGCCTACACGTCTGTACGCCGGTTTCCACC                    | 2940 |
| AY721616.1  | CGTGATAAGCGCCACGCCCGCAGCTCGCCGCCTGCACGTCTGTACGCCGGTTTCCACC                   | 2940 |
| KY354681.1  | CGTGATAAGCGCCACGCCCGCAGCTCGCCGCCTGCACGTCTGTACGCCGGTTTCCACC                   | 2937 |
| KP455643.1  | CGTGATAAGCGCCACGCCCGCAGCTCGCCGCCTGCACGTCTGTACGCCGGTTTCCACC                   | 2940 |
| MN309751.1  | CGTGATAAGCGCCACGCCCGCAGCTCGCCGCCTGCACGTCTGTACGCCGGTTTCCACC<br>**** * * * * * | 2940 |
| AY369136.1  | CGCTCTAGCGGTGATCGAGGAACCGATGGAGACAGACTAGGCCGAGCTGTTGTGCGTCAG                 | 3000 |
| KY315688.1  | CGCTTTAGCGGTGATCGAGGAACCGGTGGAGACAGACTAGGCCGAGCTGTTGTGCGTCAG                 | 2991 |
| JN189909.2  | CGCTCTAGCGGTGATCGTGGAACCGATGGAGACGGAAGTGGAGCCGAGCTGCTGTGCGTCAG               | 3000 |
| MT157513.1  | TCTTCCAGCAGTGGTCGAGGAACCGATGGAGACGGAAGTGGAGCCGAGCTGCTGTGCGTCAG               | 2999 |
| JN189865.2  | CCTTCCAGCGGTGATCGAGGAACCGATGGAGACGGAAGTGGAGCCGAGCTGCTGTGCGCCAG               | 3000 |
| MF144242.1  | CCTTCCAGTGGTGATCGAGGAACCGATGGAGACGGAAGTGGAGCCGAGCTGCTGTGCGTCAG               | 2997 |
| AF319555.1  | CCTTCCAGCGGTGATCGAGGAACCGATGGAGACGGAAGTGGAGCCGAGCTGCTGTGCGTCAG               | 3000 |
| FJ789783.1  | CCTTCCAGCGGTGATCGAGGAACCGATGGAGACGGAAGTGGAGCCGAGCTGCTGTGCGTCAG               | 3000 |
| NC_008040.1 | CCTTCCAGCGGTGATCGAGGAACCGATGGAGACGGAAGTGGAGCCGAGCTGCTGTGCGTCAG               | 3000 |
| EF558368.1  | CCTTCCAGCGGTGATCGAGGAGCCGATGGAGACGGAAGTGGAGCCGAGCTGCTGTGCGTCAG               | 3000 |
| AY721616.1  | CCTTCCAGCGGTGATCGAGGAACCGATGGAGACGGAAGTGGAGCCGAGCTGCTGTGCGTCAG               | 3000 |
| KY354681.1  | CCTTCCAACGCTGATCGAGGAGCCGATGGAGACGGAAGTGGAGCCGAGCTGCTGTGCGTCAG               | 2997 |
| KP455643.1  | CCTTCCAGCGGTGATCGAGGAACCGATGGAGACGGAAGTGGAGCCGAGCTGCTGTGCGTCGG               | 3000 |
| MN309751.1  | CCTTCCAGCGGTGATCGAGGAACCGATGGAGACGGAAGTGGAGCCGAGCTGCTGTGCGTCAG<br>* * * * *  | 3000 |
| AY369136.1  | CGTCAACGACGTCGCACTCAAGTGATAGACAGGTCACCTGCCTGCTCCACCCCC-CTGGAC                | 3059 |
| KY315688.1  | CGTCAACGACGTCGCACTCAAGTGATAGACAGGTCACCTGCCTGCTCCACCCCC-CTGGAC                | 3050 |
| JN189909.2  | CGTCAGCGACGTCGCACTCAGGTGTAGACAGGTCACCTGCCTGCTCCACCCCCCGGAC                   | 3060 |
| MT157513.1  | CGTCAGCGACGTCGCACTCAAGTGATAGACAGGTCACCTGCCTGCTCCACCCCCCT-GGAC                | 3058 |
| JN189865.2  | CGTCAGCGACGTCGCACTCAAGTGATAGACAGGTCACCTGCCTGCTCCACCCCCCT-GGAC                | 3059 |
| MF144242.1  | CGTCAGCGACGTCGCACTCAAGTGATAGACAGGTCACCTGCCTGCTCCACCCCCCT-GGAC                | 3056 |
| AF319555.1  | CGTCAGCGACGTCGCACTCAAGTGATAGACAGGTCACCTGCCTGCTCCACCCCCCT-GGAC                | 3059 |
| FJ789783.1  | CGCCATCGACGTCGCACTCAAGTGATAGACGGGTACCTGCCTGCTCCACCCCCCG-GAC                  | 3059 |
| NC_008040.1 | CCCCGCGACGTCGCACTCAAGTGATAGACAGGTCACCTGCCTGCTCCACCCCCCTGGAC                  | 3060 |
| EF558368.1  | CGCCAGGGACGTCGCACTCAAGTGATAGACAGGTCACCTGCCTGCTCCACCCCC-CTGGAC                | 3059 |
| AY721616.1  | CGCCAGCGACGTCGCACTCAAGTGATAGACAGGTCACCTGCCTGCTCCACCCCC-CTGGAC                | 3059 |
| KY354681.1  | CGCCAGCGACGTCGCACTCAAGTGATAGACAGGTCACCTGCCTGCTCCACCCCC-C----                 | 3051 |
| KP455643.1  | CGTCAGCGACGTCGCACTCAAGTGATAGACAGGTCACCTGCCTGCTCCACCCCC-CTGGAC                | 3059 |
| MN309751.1  | CGTCAGCGACGTCGCACTCAAGTGATAGACAGGTCACCTGCCTGCTCCACCCCC-CTGGAC<br>* * * * *   | 3059 |
| AY369136.1  | CGTTTTGGTCCCTTAATCAGCTTTATGCTGTCTACGCTTCGGC-                                 | 3103 |
| KY315688.1  | CGTTTTGGTCCCTTAATCAGCTTTATGCTATCTTACGCTTCGGCA                                | 3095 |
| JN189909.2  | CGTCTTGGTCCCTTAATCAGCTTTATGCTGTCTTACGCTTCGGC-                                | 3104 |
| MT157513.1  | CGTTTTGGTCCCTTAATCAGCTTTATGCTGTCTTACGCTTCGGCG                                | 3103 |
| JN189865.2  | CGTTTTGGTCCCTTAATCAGCTTTATGCTGTCTTACGCTTCGGC-                                | 3103 |
| MF144242.1  | CGTTTTGGTCCCTTAATCAGCTTTATGCTGTCTTACGCTTCGGC-                                | 3100 |
| AF319555.1  | CGTTTTGGTCCCTTAATCAGCTTTATGCTGTCTTACGCTTCGGC-                                | 3103 |
| FJ789783.1  | CGGTTTTGGTCCCTTAATCAGCTTTATGCTGTCTTACGCTTCGGCG                               | 3104 |
| NC_008040.1 | CGTTTTGGTCCCTTAATCAGCTTTATGCTGTCTTACGCTTCGGCG                                | 3105 |
| EF558368.1  | CGTTTTGGTCCCTTAATCAGCTTTATGCTGTCTTACGCTTCGGC-                                | 3103 |
| AY721616.1  | CGTTTTGGTCCCTTAATCAGCTTTATGCTGTCTTACGCTTCGGC-                                | 3103 |
| KY354681.1  | -----                                                                        | 3051 |
| KP455643.1  | CATTTTTGGTCCCTTAATCAGCTTTATGCTGTCTTACGCTTCGGC-                               | 3103 |
| MN309751.1  | CGTTTTGGTCCCTTGATCAGCTTTATGCTGTCTTACGCTTCGGC-                                | 3103 |

**Figure S2. Multiple sequence alignment of RNA2 sequences from the selected genotype representatives.**

| GB acc. no  | Conventional PCR forward primer:AATGGTACGCAAAGGTGA                      | bp  |
|-------------|-------------------------------------------------------------------------|-----|
| KY354702.2  | -----CCGCTTTGCAATCAAAATGGTACGCAAAGGTGATAAGAAATTGGCAAAA                  | 50  |
| KF386164.1  | TAATTCGACATCGCTTTGCATCTCAAAATGGTACGCAAAGGTGAGAAGAAATTGGCTAAA            | 60  |
| JX402858.1  | -----                                                                   | 0   |
| KY315689.1  | -TAATTCAGCACCGCTTTGCAATCAAAATGGTACGCAAAGGTGAGAAGAAATTGGCAAAA            | 59  |
| JN189992.2  | -TAATCCATCACCGCTTTGCAATCAAAATGGTACGCAAAGGTGAGAAGAAATTGGCAAAA            | 59  |
| GU592791.1  | -----TNNTNCNACNAATGGTACGCAAAGGTGAGAAGAAATTGGCAAAA                       | 44  |
| AF499774.1  | -----ATGGTACGCAAAGGTGATAAGAAATTGGCAAAA                                  | 33  |
| MG637439.1  | -TAATCCATCACCGCTTTGCAATCAAAATGGTACGCAAAGGTGAGAAGAAATTGGCAAAAG           | 59  |
| KU705815.1  | -----CCCCCTACAAATGGTACGCAAAGGTGAGAAGAAATTGGCAAAA                        | 43  |
| AF245004.1  | -----CTTTGCAAGTCAAAATGGTACGCAAAGGTGAGAAGAAATTGGCAAAA                    | 47  |
| JF412263.1  | -TAATCCATCACCGCTTTGCAATCAAAATGGTACGCAAAGGTGAGAAGAAATTGGCAAAA            | 59  |
| MN309752.1  | -TAATCCATCACCGCTTTGCAATCAAAATGGTACGCAAAGGTGAGAAGAAATTGGCAAAA            | 59  |
| KM588181.1  | ---TCCTTCATCGCTTTGCAATCAAAATGGTACGCAAAGGTGAGAAGAAATTGGCAAAA             | 56  |
| FJ789784.1  | -TAATCCACCACCGCTTTGCAATCAAAATGGTACGCAAAGGTGAGAAGAAATTGGCAAAA            | 59  |
| AF245003.1  | -----CTTTGCAAGTCAAAATGGTACGCAAAGGTGAGAAGAAATTGGCAAAA                    | 47  |
| NC_008041.1 | -TAATCCATCACCGCTTTGCAATCAAAATGGTACGCAAAGGTGAGAAGAAATTGGCAAAA            | 59  |
| AY744705.1  | -TAATCCATCACCGCTTTGCAATCAAAATGGTACGCAAAGGTGAGAAGAAATTGGCAAAA            | 59  |
| KY354702.2  | CCTGCGACCACAAAGGCCGCGCAATCCTCAACCACGTCGACGTGCAACACAGCGCCGTCGC           | 110 |
| KF386164.1  | ACAGCGACCACCAAGGCCGCTAATCCTCAACCCCGTCGACGTGCCGCCAACCGGCGGCGT            | 120 |
| JX402858.1  | -CCGCGACCACCAAGGCCGCGCAATCCGCAACCCCGTCGACGTGCTAACAATCGTCGGCGT           | 59  |
| KY315689.1  | CCCGCGACCACCAAGGCCGCGCAATCCGCAACCCCGCGACGTGCTAACAATCGTCGGCGT            | 119 |
| JN189992.2  | CCCGCGACCACCAAGGCCGCGCAATCCGCAACCCCGCGACGTGCTAACAATCGTCGGCGT            | 119 |
| GU592791.1  | CCCGCGACCACCAAGGCCGCGCAATCCGCAACCCCGCGACGTGCTAACAATCGTCGGCGT            | 104 |
| AF499774.1  | CCCGCGACCACCAAGGCCGCGCAATCCGCAATCCCGCGACGTGCTAACAATCGTCGGCGT            | 93  |
| MG637439.1  | CCCGCGACCACCAAGGCCGCGCAATCCGCAACCCCGCGACGTGCTAACAATCGTCGGCGT            | 119 |
| KU705815.1  | CCCGCGACCACCAAGGCCGCGCAATCCGCAACCCCGCGACGTGCTAACAATCGTCGGCGT            | 103 |
| AF245004.1  | CCCGCGACCACCAAGGCCGCGCAATCCGCAACCCCGCGACGTGCTAACAATCGTCGGCGT            | 107 |
| JF412263.1  | CCCGCGACCACCAAGGCCGCGCAATCCGCAACCCCGCGACGTGCTAACAATCGTCGGCGT            | 119 |
| MN309752.1  | CCCGCGACCACCAAGGCCGCGCAATCCGCAACCCCGCGACGTGCTAACAATCGTCGGCGT            | 119 |
| KM588181.1  | CCCGCGACCACCAAGGCCGCGCAATCCGCAACCCCGCGACGTGCTAACAATCGTCGGCGT            | 116 |
| FJ789784.1  | CCCGCGACCACCAAGGCCGCGCAATCCGCAACCCCGCGACGTGCTAACAATCGTCGGCGT            | 119 |
| AF245003.1  | CCCGCGACCACCAAGGCCGCGCAATCCGCAACCCCGCGACGTGCTAACAATCGTCGGCGT            | 107 |
| NC_008041.1 | CCCGCGACCACCAAGGCCGCGCAATCCGCAACCCCGCGACGTGCTAACAATCGTCGGCGT            | 119 |
| AY744705.1  | CCCGCGACCACCAAGGCCGCGCAATCCGCAACCCCGCGACGTGCTAACAATCGTCGGCGT            | 119 |
|             | * * * * * * * * * * * * * * * * * * * * * * * * * * * * * * * * * * * * |     |
| KY354702.2  | AGTGGTAGGGCTGATGCACCTTAGCTAAGGCATCGACTATCACGGGATTGGACGTGCG              | 170 |
| KF386164.1  | AGTAATCGACCTGACGCGCTTTAGCAAAGGCTTCGACTGTCACGGGATTCGGACGTGGG             | 180 |
| JX402858.1  | AGTAACCGCATTGACGCACCCGTGTCTAAGGCTCGACCGTAACCTGGGTTTGGACGTGGG            | 119 |
| KY315689.1  | AGTAATCGCACTGACGCACCTGTGTCTAAGGCTCGACTGTAACCTGGGTTTGGACGTGGG            | 179 |
| JN189992.2  | AGTAATCGCACTGACGCACCTGTGTCTAAGGCTCGACCGTAACCTGGATTGGACGTGGG             | 179 |
| GU592791.1  | AGTAATCGCACTGACGCACCTGTGTCTAAGGCTCGACTGTAACCTGGATTGGACGTGGG             | 164 |
| AF499774.1  | AGTAATCGCACTGACGCACCTGTGTCTAAGGCTCGACTGTAACCTGGATTGGACGTGGG             | 153 |
| MG637439.1  | AGTAACCGCACTGACGCACCTGTGTCTAAGGCTCGACTGTGACTGGATTGGACGTGGG              | 179 |
| KU705815.1  | AGTAATCGCACTGACGCACCTGTGTCTAAGGCTCGACTGTGACTGGATTGGACGTGGG              | 163 |
| AF245004.1  | AGTAATCGCACTGACGCACCTGTGTCTAAGGCTCGACTGTGACTGGATTGGACGTGGG              | 167 |
| JF412263.1  | AGTAATCGCACTGACGCACCTGTGTCTAAGGCTCGACTGTGACTGGATTGGACGTGGG              | 179 |
| MN309752.1  | AGTAACCGCACTGACGCACCTGTGTCTAAGGCTCGACTGTGACCGGATTGGACGTGGG              | 179 |
| KM588181.1  | AGTAATCGCACTGACGCACCTGTGTCTAAGGCTCGACTGTGACTGGATTGGACGTGGG              | 176 |
| FJ789784.1  | AGTAATCGCACTGACGCACCTGTGTCTAAGGCTCGACTGTAACCTGGATTGGACGTGGG             | 179 |
| AF245003.1  | AGCAATCGCACTGACGCACCTGTGTCTAAGGCTCGACTGTAACCTGGATTGGACGTGGG             | 167 |
| NC_008041.1 | AGTAATCGCACTGACGCACCTGTGTCTAAGGCTCGACTGTAACCTGGATTGGACGTGGG             | 179 |
| AY744705.1  | AGTAATCGCACTGACGCACCTGTGTCTAAGGCTCGACTGTAACCTGGATTGGACGTGGG             | 179 |
|             | ** * * * * * * * * * * * * * * * * * * * * * * * * * * * * * * * * * *  |     |
| KY354702.2  | ACCAATGATGTCCACATCTCGGGAATGTCACGGATCGCTCAGGCAGTTGTTCCAGCCGGG            | 230 |
| KF386164.1  | ACCAATGACGTCCATCTCTCGGGTATGTCGAGAATCTCCCAAGCAGTCCTCGCGCCGGG             | 240 |
| JX402858.1  | ACCAATGACGTCCATCTCTCAGGTATGTCGAGAATCGCCCAAGCCGTCCTCCAGCCGGG             | 179 |
| KY315689.1  | ACCAATGACGTCCATCTCTCAGGTATGTCGAGAATCTCCAGGCCGTCCTCCAGCCGGG              | 239 |
| JN189992.2  | ACCAATGACGTCCATCTCTCAGGTATGTCGAGAATCTCCAGGCCGTCCTCCAGCCGGG              | 239 |
| GU592791.1  | ACCAATGACGTCCATCTCTCAGGTATGTCGAGAATCTCCAGGCCGTCCTCCAGCCGGG              | 224 |
| AF499774.1  | ACCAATGAAGTCTATCTCTCAGGTATGTCGAGAATCTCCAGGCCGTCCTCCAGCCGGG              | 213 |
| MG637439.1  | ACCAATGACGTCCATCTCTCAGGTATGTCGAGAATCTCCAGGCCGTCCTCCAGCCGGG              | 239 |
| KU705815.1  | ACCAATGACGTCCATCTCTCAGGTATGTCGAGAATCTCCAGGCCGTCCTCCAGCCGGG              | 223 |
| AF245004.1  | ACCAATGACGTCCATCTCTCAGGTATGTCGAGAATCTCCAGGCCGTCCTCCAGCCGGG              | 227 |
| JF412263.1  | ACCAATGACGTCCATCTCTCAGGTATGTCGAGAATCTCCAGGCCGTCCTCCAGCCGGG              | 239 |
| MN309752.1  | ACCAATGACGTCCATCTCTCAGGTATGTCGAGAATCTCCAGGCCGTCCTCCAGCCGGG              | 239 |
| KM588181.1  | ACCAATGACGTCCATCTCTCAGGTATGTCGAGAATCTCCAGGCCGTCCTCCAGCCGGG              | 236 |
| FJ789784.1  | ACCAATGACGTCCATCTCTCAGGTATGTCGAGAATCTCCAGGCCGTCCTCCAGCCGGG              | 239 |
| AF245003.1  | ACCAATGACGTCCATCTCTCAGGTATGTCGAGAATCTCCAGGCCGTCCTCCAGCCGGG              | 227 |



|             |                                                                  |     |
|-------------|------------------------------------------------------------------|-----|
| AY744705.1  | ACTGACAACGATCACACCTTCGACGCGCTTCAAGCAACTCGTGGTGCAGTCGTTGCCAAA     | 479 |
|             | *****                                                            |     |
|             | TGGTGGGAAAG                                                      |     |
| KY354702.2  | TGGTGGGAAAGCCGAACGGTCCGGCCCCAGTATACTCGAACGCTTCTCTGGACCTCAACC     | 530 |
| KF386164.1  | TGGTGGGAGCAGGACAGTACGTCACAGTACACTCGAACCATGCTCTGGACCTCAACA        | 540 |
| JX402858.1  | TGGTGGGAAAGCAGAAGTGTCCGACCACAGTACACCCGCACGCTCCTTTGGACCTCATCG     | 479 |
| KY315689.1  | TGGTGGGAAAGCAGAACAGTCCGACCTCAGTACACCCGTACGCTCCTCTGGACCTCGTCG     | 539 |
| JN189992.2  | TGGTGGGAAAGCAGAACAGTCCGACCGCAGTTCACCTCGCACGCTCCTCTGGACCTCGTCG    | 539 |
| GU592791.1  | TGGTGGGAAAGCAGAACAGTCCGACCTCAGTACACCCGCACGCTCCTCTGGACCTCGTCG     | 524 |
| AF499774.1  | TGGTGGGAAAGCAGAACAGTCCGACCTCAGTACACCCGCACGCTCCTCTGGACCTCGTCG     | 513 |
| MG637439.1  | TGGTGGGAAAGCAGAACAGTCCGACCTCAGTACACCCGCACGCTCCTCTGGACCTCGTCG     | 539 |
| KU705815.1  | TGGTGGGAAAGCAGAACAGTCCGACCTCAGTACACCCGTACGCTCCTCTGGACCTCGTCG     | 523 |
| AF245004.1  | TGGTGGGAAAGCAGAACAGTCCGACCTCAGTACACCCGCACGCTCCTCTGGACCTCGTCG     | 527 |
| JF412263.1  | TGGTGGGAAAGCAGAACAGTCCGACCTCAGTACACCCGCACGCTCCTCTGGACCTCGTCG     | 539 |
| MN309752.1  | TGGTGGGAAAGCAGAACAGTCCGACCCAGTACACCCGCACGCTCCTCTGGACCTCGTCG      | 539 |
| KM588181.1  | TGGTGGGAAAGCAGAACAGTCCGACCTCAGTACACCCGTACGCTCCTCTGGACCTCGTCG     | 536 |
| FJ789784.1  | TGGTGGGAAAGCAGTACAGTCCGACCTCAGTACACCCGCACGCTCCTCTGGACCTCGTCG     | 539 |
| AF245003.1  | TGGTGGGAAAGCAGAACAGTCCGACCTCAGTACACCCGCACGCTCCTCTGGACCTCGTCG     | 527 |
| NC_008041.1 | TGGTGGGAAAGCAGAACAGTCCGACCTCAGTACACCCGCACGCTCCTCTGGACCTCGTCG     | 539 |
| AY744705.1  | TGGTGGGAAAGCAGAACAGTCCGACCTCAGTACACCCGCACGCTCCTCTGGACCTCGTCG     | 539 |
|             | *****                                                            |     |
| KY354702.2  | GGGAAGGAGCAGCGATTGACGTCACCTGGCCGGCTGGTACTCCTGTGTGTTGGCAGCAAC     | 590 |
| KF386164.1  | GGAAAGGAGCAGCGTTTGACTTCACCTGGACGCTTCATTCTCCTCTGTGTGCGCAGCAAC     | 600 |
| JX402858.1  | GGAAAGGAGCAGCGCTCTCACGTCACCTGGTCGGCTGATACTCCTGTGTGTGCGCAACAAC    | 539 |
| KY315689.1  | GGAAAGGAGCAGCGCTCTCACGTCACCTGGTCGGCTGATACTCCTGTGTGTGCGCAGCAAC    | 599 |
| JN189992.2  | GGAAAGGAGCAGCGCTCTTACATCACCTGGTCGGCTGATACTCCTGTGTGTGCGCAACAAC    | 599 |
| GU592791.1  | GGAAAGGAGCAGCGCTCTCACGTCACCTGGTCGGCTGATACTCCTGTGTGTGCGCAACAAC    | 584 |
| AF499774.1  | GGAAAGGAGCAGCGCTCTCATGTCACCTGGTCGGCTGATACTCCTGTGTGTGCGCAACAAC    | 573 |
| MG637439.1  | GGAAAGGAGCAGCGCTCTCACGTCACCTGGTCGGCTGATACTCCTGTGTGTGCGCAACAAC    | 599 |
| KU705815.1  | GGAAAGGAGCAGCGCTCTCACGTCACCTGGTCGGCTGATACTCCTGTGTGTGCGCAACAAC    | 583 |
| AF245004.1  | GGAAAGGAGCAGCGCTCTCACGTCACCTGGTCGGCTGATACTCCTGTGTGTGCGCAACAAC    | 587 |
| JF412263.1  | GGAAAGGAGCAGCGCTCTCACGTCACCTGGTCGGCTGATACTCCTGTGTGTGCGCAACAAC    | 599 |
| MN309752.1  | GGAAAGGAGCAGCGCTCTCACGTCACCTGGTCGGCTGATACTCCTGTGTGTGCGCAACAAC    | 599 |
| KM588181.1  | GGAAAGGAGCAGCGCTCTCACGTCACCTGGTCGGCTGATACTCCTGTGTGTGCGCAACAAC    | 596 |
| FJ789784.1  | GGAAAGGAGCAGCGCTCTCACGTCACCTGGTCGGCTGATACTCCTGTGTGTGCGCAACAAC    | 599 |
| AF245003.1  | GGAAAGGAGCAGCGCTCTCACGTCACCTGGTCGGCTGATACTCCTGTGTGTGCGCAACAAC    | 587 |
| NC_008041.1 | GGAAAGGAGCAGCGCTCTCACGTCACCTGGTCGGCTGATACTCCTGTGTGTGCGCAACAAC    | 599 |
| AY744705.1  | GGAAAGGAGCAGCGCTCTCACGTCACCTGGTCGGCTGATACTCCTGTGTGTGCGCAACAAC    | 599 |
|             | ** *****                                                         |     |
| KY354702.2  | ACTGACGTTGTCAACGTGTGTCAGTCATGTGTCGCTGGAGCGTTGCGCTTAGTGTCCCGTCC   | 650 |
| KF386164.1  | ACTGACGTGGTTAACGTGTGTCGGTGTTATGTGCTGAGGTGTGCGCCTCAGTGTCCCATCT    | 660 |
| JX402858.1  | ACTGACGTGGTTAACGTTTTCAGTGCTGTGTCGCTGGAGTGTTCGACTGAGCGTTCCGTCC    | 599 |
| KY315689.1  | ACTGATGTGGTCAACGTGTGTCAGTGCTGTGTCGCTGGAGTGTTCGACTGAGCGTTCCATCT   | 659 |
| JN189992.2  | ACTGACGTGGTTAACGTGTGTCGGTGCTGTGTCGCTGGAGTGTTCGACTGAGCGTTCCGTCT   | 659 |
| GU592791.1  | ACTGATGTGGTCAACGTGTGTCAGTGCTGTGTCGCTGGAGTGTTCGACTGAGCGTTCCATCT   | 644 |
| AF499774.1  | ACTGATGTGGTCAACGTGTGTCAGTGCTGTGTCGCTGGAGTGTTCGACTGAGCGTTCCATCT   | 633 |
| MG637439.1  | ACTGACGTGGTCAACGTGTGTCGGTGCTGTGTCGCTGGAGTGTTCGACTGAGCGTTCCATCT   | 659 |
| KU705815.1  | ACTGATGTGGTCAACGTGTGTCAGTGCTGTGTCGCTGGAGTGTTCGACTGAGCGTTCCATCT   | 643 |
| AF245004.1  | ACTGATGTGGTCAACGTGTGTCAGTGCTGTGTCGCTGGAGTGTTCGACTGAGCGTTCCATCT   | 647 |
| JF412263.1  | ACTGATGTGGTCAACGTGTGTCAGTACTGTGTCGCTGGAGTGTTCGACTGAGCGTTCCATCT   | 659 |
| MN309752.1  | ACTGATGTGGTCAACGTGTGTCAGTACTGTGTCGCTGGAGTGTTCGACTGAGCGTTCCATCT   | 659 |
| KM588181.1  | ACTGATGTGGTCAACGTGTGTCAGTGCTGTGTCGCTGGAGTGTTCGACTGAGCGTTCCATCT   | 656 |
| FJ789784.1  | ACCGATGTGGTCAACGTGTGTCGGTGCTATGTGTCGCTGGAGTGTTCGATTGAGCGTTCCATCT | 659 |
| AF245003.1  | ACTGATGTGGTCAACGTGTGTCAGTGCTGTGTCGCTGGAGTGTTCGACTGAGCGTTCCATCT   | 647 |
| NC_008041.1 | ACTGATGTGGTCAACGTGTGTCAGTGCTGTGTCGCTGGAGTGTTCGACTGAGCGTTCCATCT   | 659 |
| AY744705.1  | ACTGATGTGGTCAACGTGTGTCAGTGCTGTGTCGCTGGAGTGTTCGACTGAGCGTTCCATCT   | 659 |
|             | ** ** *                                                          |     |
| KY354702.2  | CTTGAGACACCTGAGGACACCACCGCTCCAATTACTACCCAGGCGCCACTCCACAACGAT     | 710 |
| KF386164.1  | CTCGAGACGCTGAGGACACAGCTGCACCGATTTCGTCACAGGGTCCCCTCTACAACGAT      | 720 |
| JX402858.1  | CTTGAAACACCTGAAGAGACCAACCGTCCCATCATGACACAGGGTCCCCTGTACAACGAT     | 659 |
| KY315689.1  | CTTGAGACACCTGAAGAGACCACCGTCCCATCATGACACAAGGTTCCCTGTACAACGAT      | 719 |
| JN189992.2  | CTTGAAACACCTGAAGAGACCACCGTCCCATCATGACACAAGGTTCCCTGTACAATGAT      | 719 |
| GU592791.1  | CTTGAGACACCTGAAGAGACCACCGTCCCATCATGACACAAGGTTCCCTGTACAACGAT      | 704 |
| AF499774.1  | CTTGAGACACCTGAAGAGACCACCGTCCCATCATGACACAAGGTTCCCTGTACAACGAT      | 693 |
| MG637439.1  | CTTGAGACACCTGAAGAGACCACCGTCCCATCATGACACAAGGTTCCCTGTACAACGAT      | 719 |
| KU705815.1  | CTTGAGACACCTGAAGAGACCACCGTCCCATCATGACACAAGGTTCCCTGTACAACGAT      | 703 |
| AF245004.1  | CTTGAGACACCTGAAGAGACCACCGTCCCATCATGACACAAGGTTCCCTGTACAACGAT      | 707 |
| JF412263.1  | CTTGAGACACCTGAGGAGACACCAGTCCCATCATGACACAAGGTTCCCTGTACAACGAT      | 719 |
| MN309752.1  | CTTGAGACACCTGAGGAGACACCAGTCCCATCATGACACAAGGTTCCCTGTACAACGAT      | 719 |
| KM588181.1  | ATTGAGACACCTGAAGAGACCACCGACCCATCATGACACAAGGTTCCCTGTACAACGAT      | 716 |
| FJ789784.1  | CTTGAGACACCTGAAGAGACCACCGTCCCATCATGACACAAGGTTCCCTGTACAACGAT      | 719 |
| AF245003.1  | CTTGAGACACCTGAAGAGACCACCGTCCCATCATGACACAAGGTTCCCTGTACAACGAT      | 707 |
| NC_008041.1 | CTTGAGACACCTGAAGAGACCACCGTCCCATCATGACACAAGGTTCCCTGTACAACGAT      | 719 |

|             |                                                                                                         |     |
|-------------|---------------------------------------------------------------------------------------------------------|-----|
| AY744705.1  | CTTGAGACACCTGAAGAGACCACCGTCCCATGATGACACAAGGTTCCTGTGTAACACGAT<br>* * * * * * * * * * * * * * * * * * * * | 719 |
| KY354702.2  | TCCATTAAACAACGGTTACTGATTTTCGGTCCATTCTTTTGGGCTCGACCCAACCTCGAC                                            | 770 |
| KF386164.1  | TCCCTTGCACAAA-----CTGACTTCAAATCCATCCTCCTGGGTTCCACACAGCTGGAC                                             | 774 |
| JX402858.1  | TCCCTCGCTGCAC-----ATGACTTCAAGTCCATCCTCCTAGGATCCACACCACTGGAC                                             | 713 |
| KY315689.1  | TCCCTTTCCACAAA-----ATGACTTCAAGTCCATCCTCCTAGGATCCATACCACTGGAC                                            | 773 |
| JN189992.2  | TCCCTCGCTGCCAA-----CTGACTTCAAGTCCATCCTCCTAGGATCCACAGCACTGGAC                                            | 773 |
| GU592791.1  | TCCCTTTCCACAAA-----ATGACTTCAAGTCCATCCTCCTAGGATCCACACCACTGGAC                                            | 758 |
| AF499774.1  | TCCCTTTCCACAAA-----CTGACTTCAAGTCCATCCTCCTAGGATCCACACCACTGGAC                                            | 747 |
| MG637439.1  | TCCCTTTCCACAAA-----ATGACTTCAAGTCCATCCTCCTAGGATCCACGCCACTGGAC                                            | 773 |
| KU705815.1  | TCCCTTTCCACAAA-----ATGACTTCAAGTCCATCCTCCTAGGATCCACGCCACTGGAT                                            | 757 |
| AF245004.1  | TCCCTTTCCACAAA-----ATGACTTTAAGTCCATCCTCCTAGGATCCACACCACTGGAC                                            | 761 |
| JF412263.1  | TCCCTTTCCACAAA-----ATGACTTCAAGTCCATCCTCCTAGGATCCACACCACTGGAC                                            | 777 |
| MN309752.1  | TCCCTTTCCACAAA-----ATGACTTCAAGTCCATCCTCCTAGGATCCACACCACTGGAC                                            | 773 |
| KM588181.1  | TCCCTTTCCACAAA-----CTGACTTCAAGTCCATCCTCCTAGGATCCACACCACTGGAT                                            | 770 |
| FJ789784.1  | TCCCTTTCCACAAA-----ATGACTTCAAGTCCATCCTCCTAGGATCCACACCACTGGAC                                            | 773 |
| AF245003.1  | TCCCTTTCCACAAA-----ATGACTTCAAATCCATCCTCCTAGGATCCACACCACTGGAC                                            | 761 |
| NC_008041.1 | TCCCTTTCCACAAA-----ATGACTTCAAGTCCATCCTCCTAGGATCCACACCACTGGAC                                            | 773 |
| AY744705.1  | TCCCTTTCCACAAA-----ATGACTTCAAGTCCATCCTCCTAGGATCCACACCACTGGAC<br>*** * ** * * **** * * * * * * * *       | 773 |
| KY354702.2  | CTCGCTCCTGCAAACGCTGTCTTTGTCACTGACAAAACCGTTGCCCATTTGATTACAGTCTT                                          | 830 |
| KF386164.1  | ATATCCCCGGAGCGGCCCATCTTCCAGATGGACCGCCCGCTGTCCATTGATTACAAGCTG                                            | 834 |
| JX402858.1  | ATAGCCCCTGACGGTGCAGTCTACACAGCTGGACCGTCCGCTGTCCATCGATTACAGCCTT                                           | 773 |
| KY315689.1  | ATTGCCCCGTGATGGAGCAGTCTTCCAGCTGGACCGCCCGCTGTCCATTGACTACAGCCTT                                           | 833 |
| JN189992.2  | ATTGCTCCTGACGGAGCAATCTTCCAGCTGGACCGTCCGCTGTCTCATTGACTACAACCTT                                           | 833 |
| GU592791.1  | ATTGCCCTGATGGAGAGCTTCTCCAGCTGGACCGTCCGCTGTCCATTGACTACAGCCTT                                             | 818 |
| AF499774.1  | ATTGCCCCCTGATGGAGCAGTCTTCCAGCTGGACCGTCCGCTGTCCATTGACTACACCTT                                            | 807 |
| MG637439.1  | ATTGCCCCCTGATGGAGCAGTCTTCCAGCTGGACCGTCCGCTGTCCATCGACTACAGCCTT                                           | 833 |
| KU705815.1  | ATTGCCCCCTGATGGAGCAGTCTTCCAGCTGGACCGTCCGCTGTCCATCGACTACAGCCTT                                           | 817 |
| AF245004.1  | ATTGCCCTGATGGAGCAGTCTTCCAGCTGGATCGACCGTGTCCATTGACTACAGCCTT                                              | 821 |
| JF412263.1  | ATTGCCCCCTGATGGAGCAGTCTTCCAGCTGGACCGTCCGCTGTCCATTGACTACAGCCTT                                           | 833 |
| MN309752.1  | ATTGCCCCCTGATGGAGCAGTCTTCCAGCTGGACCGTCCGCTGTCCATTGACTACAGCCTT                                           | 833 |
| KM588181.1  | ATTGCCCCCTGATGGAGCAGTCTTCCAGCTGGACCGTCCGCTGTCCATTGACTACAGCCTT                                           | 830 |
| FJ789784.1  | ATTGCCCTGATGGAGCAGTCTTCCAGCTGGACCGTCCGCTATCCATTGACTACAGCCTT                                             | 821 |
| AF245003.1  | ATTGCCCCCTGATGGAGCAGTCTTCCAGCTGGACCGTCCGCTGTCCATTGACTACAGCCTT                                           | 833 |
| NC_008041.1 | ATTGCCCCCTGATGGAGCAGTCTTCCAGCTGGACCGTCCGCTGTCCATTGACTACAGCCTT                                           | 833 |
| AY744705.1  | ATTGCCCCCTGATGGAGCAGTCTTCCAGCTGGACCGTCCGCTGTCCATTGACTACAGCCTT<br>* * * * * ** * * * * * * * * * *       | 833 |
| KY354702.2  | GGAGTGGGCGACGTCGACCGGGGCGGTATACTGGCACCTGCGGAAGAAAGCTGGAGACACT                                           | 890 |
| KF386164.1  | GGAACCCGGAGATGTTGACCGTGCCGTCTATTGGCACCTCAAGAAGTTTGC GGGGCACTGCC                                         | 894 |
| JX402858.1  | GGAACCTGGAGATGTTGACCGTGCCGTTTATTGGCACCTCAAGAAGTTTGC TGGAACTGCC                                          | 893 |
| KY315689.1  | GGAACCTGGAGATGTTGACCGTGCTGTTTACTGGCACCTCAAGAAGTTTGC TG GAAATGCT                                         | 833 |
| JN189992.2  | GGAGTTGGAGATGTTGACCGTGCCGTCTACTGGCACCTCAAGAAGTTTGC TG GCCACCGCT                                         | 893 |
| GU592791.1  | GGAACCTGGAGATGTTGACCGTGCTGTTTATTGGCACCTCAAGAAGTTTGC TG GAAATGCT                                         | 878 |
| AF499774.1  | GGAACCTGGAGATGTTGACCGTGCTGTTTATTGGCACCTCAAGAAGTTTGC TG GAAATGCT                                         | 867 |
| MG637439.1  | GGAACCTGGAGATGTTGACCGTGCTGTTTACTGGCACCTCAAGAAGTTTGC TG GAAATGCT                                         | 893 |
| KU705815.1  | GGAACCTGGAGATGTTGATCGTGCTGTTTATTGGCACCTCAAGAAGTTTGC TG GAAATGCT                                         | 877 |
| AF245004.1  | GGAACCTGGAGATGTTGACCGTGCTGTTTACTGGCACCTCAAGAAGTTTGC TG GAAATGCT                                         | 881 |
| JF412263.1  | GGAACCTGGAGATGTTGATCGAGCTGTCTATGGGCACCTCAAGAAGTTTGC TG GAAATGCT                                         | 893 |
| MN309752.1  | GGAACCTGGAGATGTTGATCGAGCTGTCTATTGGGCACCTCAAGAAGTTTGC TG GAAATGCT                                        | 893 |
| KM588181.1  | GGAACCTGGAGATGTTGATCGTGCTGTTTATTGGCACCTCAAGAAGTTTGC TG GAAATGCT                                         | 890 |
| FJ789784.1  | GGAACCTGGAGATGTTGACCGTGCTGTTTACTGGCACCTCAAGAAGTTTGC TG GAAATGCT                                         | 893 |
| AF245003.1  | GGAACCTGGAGATGTTGACCGTGCTGTTTACTGGCACCTCAAGAAGTTTGC TG GAAATGCT                                         | 881 |
| NC_008041.1 | GGAACCTGGAGATGTTGACCGTGCTGTTTATTGGCACCTCAAGAAGTTTGC TG GAAATGCT                                         | 893 |
| AY744705.1  | GGAACCTGGAGATGTTGACCGTGCTGTTTACTGGCACCTCAAGAAGTTTGC TG GAAATGCT<br>*** ** * * * * * * * * * * * * * *   | 893 |
| KY354702.2  | CAGGTACCTGCTGGGTACTTTGACTGGGGACTGTGGGATGACTTCAACAAGACATTCACA                                            | 950 |
| KF386164.1  | GCCACACCGGMTGGCTGGTTTCGCTGGGGCATCTGGGACAACCTTCAACAAAACATTTACC                                           | 954 |
| JX402858.1  | ACCACACCTGCAGGTGTGGTTTCGCTGGGGCGCTCTGGGACAACCTTAAACAAAACGTTTACA                                         | 893 |
| KY315689.1  | AGCACACCTGCAGGCTGGTTTCGCTGGGGCATCTGGGACAACCTTCAACAAGACGTTTACA                                           | 953 |
| JN189992.2  | GCCACACCTGCAGGCTGGTTTCGCTGGGGCATCTGGGACAACCTTCAACAAAACGTTTACA                                           | 953 |
| GU592791.1  | GGCACACCTGCAGGCTGGTTTCGCTGGGGCATCTGGGACAACCTTCAACAAGACGTTTCGCA                                          | 938 |
| AF499774.1  | AGCACACCTGCAGGCTGGTTTCGCTGGGGCATCTGGGACAACCTTCAACAAGACGTTTACA                                           | 927 |
| MG637439.1  | GGCACACCTGCAGGCTGGTTTCGCTGGGGCATCTGGGACAACCTTCAACAAGACGTTTACA                                           | 953 |
| KU705815.1  | GGCACACCTGCAGGCTGGTTTCGCTGGGGCATCTGGGACAACCTTCAACAAGACGTTTACA                                           | 937 |
| AF245004.1  | GGCACACCTGCAGGCTGGTTTCGCTGGGGCATCTGGGACAACCTTCAACAAGACGTTTACA                                           | 941 |
| JF412263.1  | GGCACACCTGCAGGCTGGTTTCGCTGGGGCATCTGGGACAACCTTCAACAAGACGTTTACA                                           | 953 |
| MN309752.1  | GGCACACCTGCAGGCTGGTTTCGCTGGGGCATCTGGGACAACCTTCAACAAGACGTTTACA                                           | 953 |
| KM588181.1  | GGCACACCTGCAGGCTGGTTTCGCTGGGGCATCTGGGACAACCTTCAACA                                                      |     |

```

*** *  ** *  ***  *****  *  *****  *  *  *  ** *
KY354702.2   GTTGGGGCGCCTACTACTCCGACCAGCAACCACGGCAAATCTTGCTGCCGGCTGGCAGC   1010
KF386164.1   GACGGTATCGCTTACTATTCTGACGAGCAGCCACGCCAGATCCTGCTCCCGGTAGGCACT   1014
JX402858.1   GATGGCGTTGCTTACTACCCTGACGAGCAGCCTCGTCAAATCTCCTGCCCGTTGGCACT   953
KY315689.1   GATGGCGTTGCTTACTACCCTGATGAGCAGCCTCGTCAAATCCTGCTGCCTGTTGGCACT   1013
JN189992.2   GATGGCGTTGCTTACTACTCTGATGAGCAGCCTCGTCAAATCCTCCTGCCTGTTGGCACT   1013
GU592791.1   GATGCCGTTGGCTACTACTCTGATGCGCAGCCTCGTCAAATCCTGCTGCTGTTGGCCACT   998
AF499774.1   GATGGCGTTGCCTACTACTCTGATGAGCAGCCCCGTCAAATCCTGCTGCCTGTTGGCACT   987
MG637439.1   GATGGCGTTGCTTACTACTCTGATGAGCAGCCCCGTCAAATCCTGCTGCCTGTTGGCACT   1013
KU705815.1   GATGGCGTTGCCTACTACTCTGATGAGCAGCCCCGTCAAATCCTGCTGCCTGTTGGCACT   997
AF245004.1   GATGGCGTTGCCTACTACTCTGATGAGCAGCCCCGTCAAATCCTGCTGCCTGTTGGCACT   1001
JF412263.1   GATGGCGTTGCCTACTACTCTGATGAGCAGCCCCGTCAAATCCTGCTGCCTGTTGGCACT   1013
MN309752.1   GATGGCGTTGCCTACTACTCTGATGAGCAGCCCCGTCAAATCCTGCTGCCTGTTGGCACT   1013
KM588181.1   GATGGCGTTGCCTACTACTCTGATGAGCAGCCCCGTCAAATCCTGCTGCCTGTTGGCACT   1010
FJ789784.1   GATGGCGTTGCTTACTACTCTGATGAGCAGCCTCGTCAAATCCTGCTGCCTGTTGGCACT   1013
AF245003.1   GATGGCGTTGCCTACTACTCTGATGAGCAGCCCCGTCAAATCCTGCTGCCTGTTGGCACT   1001
NC_008041.1  GATGGCGTTGCCTACTACTCTGATGAGCAGCCTCGTCAAATCCTGCTGCCTGTTGGCACT   1013
AY744705.1   GATGGCGTTGCCTACTACTCTGATGAGCAGCCCCGTCAAATCCTGCTGCCTGTTGGCACT   1013
*  *  *  *****  *  **  ***  *  *  *  *  *  *  *  *  *  *  *  *  *
Conventional PCR reverse primer: ATCCGGTTCCCTAGTGC
KY354702.2   CTCTTCACCCGTGTTGACTCGGAAAACTAACCGGGTCAATCCGGAATCCCTAGTGC   1070
KF386164.1   ACCTTCACCAAGGTCGATGCGGGAACCTAACCGGGTCAATCCGGAATCCCTAGTGC   1074
JX402858.1   GTCTGCACCAGGGTTGATTTCGGAACCTAACCGGGTCAATCCGGAATCCCTAGTGC   1013
KY315689.1   GTCTGCACCAGGGTTGACTCGGAAAACTAACCGGGTCAATCCGGAATCCCTAGTGC   1073
JN189992.2   GTCTGCACCAGGGTTGACTCGGAAAACTAACCGGGTCAATCCGGAATCCCTAGTGC   1073
GU592791.1   GTCTGCATAGGGTTGACTCGGAAAACTAACCGGGTCAATCCGGAATCCCTAGTGC   1058
AF499774.1   GTCTGCATCAGGGTTGACTCGGAAAACTAACCGGGTCAATCCGGAATCCCTAGTGC   1047
MG637439.1   GTCTGCACCAGGGTTGACTCGGAAAACTAACCGGGTCAATCCGGAATCCCTAGTGC   1073
KU705815.1   GTCTGCACCAGGGTTGACTCGGAAAACTAACCGGGTCAATCCGGAATCCCTAGTGC   1057
AF245004.1   GTCTGCACCAGGGTTGACTCGGAAAACTAACCGGGTCAATCCGGAATCCCTAGTGC   1061
JF412263.1   GTCTGCACCAGGGTTGACTCGGAAAACTAACCGGGTCAATCCGGAATCCCTAGTGC   1073
MN309752.1   GTCTGCACCAGGGTTGACTCGGAAAACTAACCGGGTCAATCCGGAATCCCTAGTGC   1073
KM588181.1   GTCTGCACCAGGGTTGACTCGGAAAACTAACCGGGTCAATCCGGAATCCCTAGTGC   1070
FJ789784.1   GTCTGCACCAGGGTTGACTCGGAAAACTAACCGGGTCAATCCGGAATCCCTAGTGC   1073
AF245003.1   GTCTGCACCAGGGTTGACTCGGAAAACTAACCGGGTCAATCCGGAATCCCTAGTGC   1061
NC_008041.1  GTCTGCACCAGGGTTGACTCGGAAAACTAACCGGGTCAATCCGGAATCCCTAGTGC   1073
AY744705.1   GTCTGCACCAGGGTTGACTCGGAAAACTAACCGGGTCAATCCGGAATCCCTAGTGC   1073
**  **  *  **  **  ***  *****  *****  *****  *****
KY354702.2   TGGATGACCAATTTGAGAAATTGATTATGGCACTAACCACTATCAAAATT-----   1120
KF386164.1   TTGATGACCAATTTGAACAATTAATTAATGCACTAAGTATTATAACTAATGAAATACAAA   1134
JX402858.1   TTGATGACCAATTTGAACAATTTGATTAAAGCACTAACATATATAAATGAAGAAATACAAA   1073
KY315689.1   TTGATGACCAATTTGAACAATTTGATTAAAGCACTAACAAATATAAATAAAGAAATACAAA   1133
JN189992.2   TTGATGACCAATTTGAACAATTTGATTAAAGCACTAACAAACATAAACAAGAAATACAAA   1133
GU592791.1   TTGATGACCAATTTGAACAATTTGATTAAAGCACTAACAAATATAAATAAAGAAATACAAA   1118
AF499774.1   TTGATGACCAATTTGAACAATTTGATTAAAGCACTAACAAACATAAATAAAGAAATACAAA   1107
MG637439.1   TTGATGACCAATTTGAACAATTTGATTAAAGCACTAACAAATATAAATAAAGAAATACAAA   1133
KU705815.1   TTGATGACCAATTTGAACAATTTGATTAAAGCACTAACAAATATAAATAAAGAAATACAAA   1117
AF245004.1   TTGATGACCAATTTGAACAATTTGATTAAAGCACTAACGAACATAAATAAAGAAATACAAA   1121
JF412263.1   TTGATGACCAATTTGAACAATTTGATTAAAGCACTAAAGAATATAAATAAAGAAATACAAA   1133
MN309752.1   TTGATGACCAATTTGAACAATTTGATTAAAGCACTAACAAATATAAATAAAGAAATACAAA   1133
KM588181.1   TTGATGACCAATTTGAACAATTTGATTAAAGCACTAACAAATATAAATAAAGAAATACAAA   1130
FJ789784.1   TTGATGACCAATTTGAACAATTTGATTAAAGCACTAACAAACATAAATAAAGAAATACAAA   1133
AF245003.1   TTGATGACCAATTTGAACAATTTGATTAAAGCACTAACAAATATAAATAAAGAAATACAAA   1121
NC_008041.1  TTGATGACCAATTTGAACAATTTGATTAAAGCACTAACAAATATAAATAAAGAAATACAAA   1133
AY744705.1   TTGATGACCAATTCGAACAATTTGATTAAAGCACTAACAAATATAAATAAAGAAATACAAA   1133
*  *****  *  **  *  *  *  *  *  *  *  *  *  *  *
KY354702.2   -----GAAATTGACAATAACAAGAGCGAAATTGAAGCTATCGCTAACAAATTAA   1169
KF386164.1   TAAACAAAACCGAAATTGGCAAGAATAAGAGCGAAATTGACGCTATCGCCACTAAATTAA   1194
JX402858.1   CAAACAAAATTGAAATTGGAAGAAGACAGAAGCGAAATTGAATCACTCGCTAGCAAATTAA   1133
KY315689.1   CAAACAAAACCGAAATTGGAAGAAGATAGAAGCGAAATTGAATCACTCGCTAGCAAATTAA   1193
JN189992.2   CAAACAAAACCGAAATTGGAAGAAGATAGAAGCGAAATTGAATCACTCGCTAGCAAATTAA   1193
GU592791.1   CAAACAAAACCGAAATTGGAAGAAGATAGAAGCGAAATTGAATCACTCGCTAGCAAATTAA   1178
AF499774.1   CAAACAAAACCGAAATTGGAAGAAGATAGAAGCGAAATTGAATCACTCGCTAGCAAATTAA   1167
MG637439.1   CAAACAAAACCGAAATTGGAAGAAGACAGAAGCGAAATTGAATCACTCGCTAGCAAATTAA   1193
KU705815.1   CAAACAAAACCGAAATTGGAAGAAGATAGAAGCGAAATTGAATCACTCGCTAGCAAATTAA   1177
AF245004.1   CAAACAAAACCGAAATTGGAAGAAGATAGAAGCGAAATTGAATCACTCGCTAGCAAATTAA   1181
JF412263.1   CAAACAAAACCGAAATTGGAAGAAGATAGAAGCGAAATTGAATCACTCGCTAGCAAATTAA   1193
MN309752.1   CAAACAAAACCGAAATTGGAAGAAGATAGAAGCGAAATTGAATCACTCGCTAGCAAATTAA   1193
KM588181.1   CAAACAAAACCGAAATTGGAAGAAGATAGAAGCGAAATTGAATCACTCGCTAGCAAATTAA   1190
FJ789784.1   CAAACAAAACCGAAATTGGAAGAAGATAGAAGCGAAATTGAATCACTCGCTAGCAAATTAA   1193
AF245003.1   CAAACAAAACCGAAATTGGAAGAAGATAGAAGCGAAATTGAATCACTCGCTAGCAAATTAA   1181
NC_008041.1  CAAACAAAACCGAAATTGGAAGAAGATAGAAGCGAAATTGAATCACTCGCTAGCAAATTAA   1193
AY744705.1   CAAACAAAACCGAAATTGGAAGAAGATAGAAGCGAAATTGAACCACTCGCTAGCAAATTAA   1193
*****  **  **  *  *****  *  ****  *****

```

|             |                                                                         |      |
|-------------|-------------------------------------------------------------------------|------|
| KY354702.2  | ACGACAAAGCACCCAAAGAGGGTTCGATTGCTATTGTTGGTACCATTGACGGCGTACCTG            | 1229 |
| KF386164.1  | AAGACAAAGCCCCCAAGGAGGTGCTATTGCTATTGTTGGTACCATTGACGGCGTACCGG             | 1254 |
| JX402858.1  | ACGACAAAGCACCCAAAGGAGGTGCGATTGCTATTGTTGGTACCCTTGATGGCGTACCGG            | 1193 |
| KY315689.1  | ACGACAAAGCACCCAAAGGAGGTGCGATTGCTATTGTTGGTACCCTTGACGGCGTACCGG            | 1253 |
| JN189992.2  | ATGACAAAGCACCCAAAGGAGGTGCGATTGCTATTGTTGGTACCCTTGACGGCGTACCGG            | 1253 |
| GU592791.1  | ACGACAAAGCACCCAAAGGAGGTGCGATTGCTATTGTTGGTACCCTTGACGGCGTACCGG            | 1238 |
| AF499774.1  | ACGACAAAGCACCCAAAGGAGGTGCGATTGCTATTGTTGGTACCCTTGACGGCGTACCGG            | 1227 |
| MG637439.1  | ATGACAAAGCACCCAAAGGAGGTGCGATTGCTATTGTTGGTACCCTTGACGGCGTACCGG            | 1253 |
| KU705815.1  | ACGACAAAGCACCCAAAGGAGGTGCGATTGCTATTGTTGGTACCCTTGACGGCGTACCGG            | 1237 |
| AF245004.1  | ACGACAAAGCACCCAAAGGAGGTGCGATTGCTATTGTTGGCACCCTTGACGGCGTACCGG            | 1241 |
| JF412263.1  | ACGACAAAGCACCCAAAGGAGGTGCGATTGCTATTGTTGGTACCCTTGACGGCGTACCGG            | 1253 |
| MN309752.1  | ACGACAAAGCACCCAAAGGAGGTGCGATTGCTATTGTTGGTACCCTTGACGGCGTACCGG            | 1253 |
| KM588181.1  | ACGACAAAGCACCCAAAGGAGGTGCGATTGCTATTGTTGGTACCCTTGACGGCGTACCGG            | 1250 |
| FJ789784.1  | ACGACAAAGCACCCAAAGGAGGTGCGATTGCTATTGTTGGTACCCTTGACGGCGTACCGG            | 1253 |
| AF245003.1  | ATGACAAAGCACCCAAAGGAGGTGCGATTGCTATTGTTGGTACCCTTGACGGCGTACCGG            | 1241 |
| NC_008041.1 | ACGACAAAGCACCCAAAGGAGGTGCGATTGCTATTGTTGGTACCCTTGACGGCGTACCGG            | 1253 |
| AY744705.1  | ATGACAAAGCACCCAAAGGAGGTGCGATTGCTATTGTTGGTACCCTTGACGGCGTACCGG            | 1253 |
|             | * * * * * * * * * * * * * * * * * * * * * * * * * * * * * * * * * * * * |      |
| KY354702.2  | GAACAGTTGACGGCGCTTACCTCGCCGAATCTGTCTAGCGTGCTTGATACGGTGCCAGCT            | 1289 |
| KF386164.1  | CTACGGTTGACGGCCTTTACACGGCCACACCCGTGCCGCGTGCTTAATAGGGTGCCAGCT            | 1314 |
| JX402858.1  | CTACGCTCGACGGCCTTTATACGGCTGGAGACGTGCCGCGTGCTTGATTGGGTGCCAGTG            | 1253 |
| KY315689.1  | CTACGCTTGAAGGCCTATACACGGCTTGAAGCGCGCCGCGTGTCTGTGCACAGGCTAAAT            | 1313 |
| JN189992.2  | CTACGCTCGAAGGCCTATATACGGCTGGAAGCGCGCCGCGTGCTTGATTGGGTGCCAGTG            | 1313 |
| GU592791.1  | CTACGCTTGAAGGCCTATACACGGCTTGAAGCGCGCCGCGTGCTTAATTGGGTGCCAGTG            | 1298 |
| AF499774.1  | CT- CGCTTGAAGGCCTATACACGGCTGGAAGCGCGCCGCGTGCTTAATTGGGTGCCAGTG           | 1286 |
| MG637439.1  | CTACGCTTGAAGGCCTATATACGGCTGGAAGCGCGCCGCGTGCTTGATTGGGTGCCAGTG            | 1313 |
| KU705815.1  | CTACGCTTGAAGGCCTATACACGGCTGGAAGCGCGCCGCGTGCTTAATTGGGTGCCAGTG            | 1297 |
| AF245004.1  | CCACGCTTGAAGGCCTATATACGGCTGGAAGCGCGCCGCGTGCTTAATTGGGTGCCAGTG            | 1301 |
| JF412263.1  | CTACGCTTGAAGGCCTATACACGGCTGGAAGCGCGCCGCGTGCTTAATTGGGTGCCAGTG            | 1313 |
| MN309752.1  | CTACGCTTGAAGGCCTATACACGGCTGGAAGCGCGCCGCGTGCTTAATTGGGTGCCAGTG            | 1313 |
| KM588181.1  | CTACGCTTGAAGGCCTATACACGGCTGGAAGCGCGCCGCGTGCTTAATTGGGTGCCAGTG            | 1310 |
| FJ789784.1  | CTACGCTTGAAGGCCTATACACGGCTGGAAGCGCGCCGCGTGCTTAATTGGGTGCCAGTG            | 1313 |
| AF245003.1  | CTACGCTTGAAGGCCTGTATACACGGCTGGAAGCGCGCCGCGTGCTTAATTGGGTGCCAGTG          | 1301 |
| NC_008041.1 | CTACGCTTGAAGGCCTATACACGGCTGGAAGCGCGCCGCGTGCTTAATTGGGTGCCAGTG            | 1313 |
| AY744705.1  | CTACGCTTGAAGGCCTATACACGGCTGGAAGCGCGCCGCGTGCTTAATTGGGTGCCAGTG            | 1313 |
|             | * * * * * * * * * * * * * * * * * * * * * * * * * * * * * * * * * * *   |      |
| KY354702.2  | TTACCAAGTCTTGTCCAAACGCCGAGGATTTCCTCTTTGGGCATGTTGGGTTACCGTTAGC           | 1349 |
| KF386164.1  | TTACCAAGTTCGTATCCACGCCGAGGATTTCCTCCCTTTGG-GCATGTTGGGTTACCGTACGC         | 1373 |
| JX402858.1  | GTACCAATTCGTATCCACGCCGAGGATTTCCTCTTTG-GGCTGTTGGGTTACCGTTAGC             | 1312 |
| KY315689.1  | GTCTGTACACAGGCTAAAACAGTGTTCCTCCAGCA-----TGTTCCGTGTTACGATGCC             | 1366 |
| JN189992.2  | GTACCAAGTTCGTATTCAACGCCGATGAAATCCCTCTTTG-GGCTGTTGGGTTACCGTCAGC          | 1372 |
| GU592791.1  | GTACCAAGTTCGTATCCAAACGCCGAGGAAGTCCCTCTTTG-GGCTGTTGGGTTACCGTTAGC         | 1357 |
| AF499774.1  | GTACCAAGTTCGTATCCAAACGCCGAGGAAGTCCCTCTTTG-GGCTGTTGGGTTACCGTTAGC         | 1345 |
| MG637439.1  | GTACCAAGTTCGTATCCACG-CCGAGGAATTCCTCTTTG-GGCTGTTGGGTTACCGTTAGC           | 1371 |
| KU705815.1  | GTACCAAGTTCGTATCCAAACGCCGAGGAATTCCTCTTTG-GGA-----                       | 1338 |
| AF245004.1  | GTACCAAGTTCGTATCCAAACGCCGAGGAAGTCCCTCTTTG-GGCTGTTGGGTTACCGTTAGC         | 1360 |
| JF412263.1  | GTACCAAGTTCGTATCCAAACGCCGAGGAATTCCTCTTTG-GGCTGTTGGGTTACCGTTAGC          | 1372 |
| MN309752.1  | GTACCAAGTTCGTATCCAAACGCCGAGGAATTCCTCTTTG-GGCTGTTGGGTTACCGTTAGC          | 1372 |
| KM588181.1  | GTACCAAGTTCGTATCCAAACGCCGAGGATCCCTCTTTG-GGCTGTTGGGTTACCGTTAGC           | 1369 |
| FJ789784.1  | GTACCAAGTTCGTATCCAAACGCCGAGGAAGTCCCTCTTTG-GGCTGTTGGGTTACCGTTAGC         | 1372 |
| AF245003.1  | GTACCAAGTTCGTATCCAAACGCCGAGGAAGTCCCTCTTTG-GGCTGTTGGGTTACCGTTAGC         | 1360 |
| NC_008041.1 | GTACCAAGTTCGTATCCAAACGCCGAGGAAGTCCCTCTTTG-GGCTGTTGGGTTACCGTTAGC         | 1372 |
| AY744705.1  | GTACCAAGTTCGTATCCAAACGCCGAGGAAGTCCCTCTTTG-GGCTGTTGGGTTACCGTTAGC         | 1372 |
|             | * * * * * * * * * * * * * * * * * * * * * * * * * * * * * * * * * * *   |      |
| KY354702.2  | TCCGCGCAGTGAGCACCACCG-----CCATGTGGTTAAATGGCCGCTGATCG-----               | 1396 |
| KF386164.1  | TCCACGTATCGAGCGCCACCGCCA-----TGTTGGCTAAATGGCCGCTGATCGCTACCCA            | 1427 |
| JX402858.1  | TCCGCGCAGTGAGCACCACCG-----                                              | 1333 |
| KY315689.1  | AAGGCACACACCAGCCGAAATCGCTGACGCAAGTGCAAACTTGGCCATGCCAAGGCACAC            | 1426 |
| JN189992.2  | TCCGCGCA-----GTGAGCACCAC-CGCCATGTGGTTAAATGGCCGCTGATC-G-----             | 1419 |
| GU592791.1  | TCCGCGTA-----GTGAGCACCAC-CGCCATGTGGTTAAANNNGCCCCNNGNCT-A-----           | 1404 |
| AF499774.1  | TCCGCGCA-----GGGAGCACCAC-CGC-----                                       | 1367 |
| MG637439.1  | TCCGCGCA-----GTGAGCACCAC-CGCCATGTGGTTAAATGGCCGCTGATC-G-----             | 1418 |
| KU705815.1  | -----                                                                   | 1338 |
| AF245004.1  | TCCGCGCA-----GTGAGCACCAC-CGCCATGTGGT-----                               | 1390 |
| JF412263.1  | TCCGCGCA-----GTGAGCACCAC-CGCCATGTGGTTAAATGGCCGCTGATC-G-----             | 1419 |
| MN309752.1  | TCCGCGCA-----GTGAGCACCAC-CGCCATGTGGTTAAATGGCCGCTGATC-G-----             | 1419 |
| KM588181.1  | TCCGCGCA-----GTGAGCACCAC-CGCCATGCGGTTAAATGGCCGCTGATC-G-----             | 1416 |
| FJ789784.1  | TCCGCGCA-----GTGAGCACCAC-CGCCATGTGGTTAAATGGCCGCTGATC-G-----             | 1419 |
| AF245003.1  | TCCGCGCA-----GTGAGCACCAC-CGCCATGTGGT-----                               | 1390 |
| NC_008041.1 | TCCGCGTA-----GTGAGCACCAC-CGCCATGTGGTTAAATGGCCGCTGATC-G-----             | 1419 |
| AY744705.1  | TCCGCGCA-----GTGAGCACCAC-CGCCATGTGGTTAAATGGCCGCTGATC-G-----             | 1419 |



|             |                                                              |      |
|-------------|--------------------------------------------------------------|------|
| KY354702.2  | -----                                                        | 1396 |
| KF386164.1  | TTTCGGC-----                                                 | 1434 |
| JX402858.1  | -----                                                        | 1333 |
| KY315689.1  | ACCAGCCGAAATCGCTGACGCAGTGCAAACTTGGCCGCAAGTTCCGCTGAGCTGGTTGA  | 1486 |
| JN189992.2  | --CTTCTCAACTCGGC-----                                        | 1433 |
| GU592791.1  | -----                                                        | 1404 |
| AF499774.1  | -----                                                        | 1367 |
| MG637439.1  | --CTTCTCAACTCGGC-----                                        | 1432 |
| KU705815.1  | -----                                                        | 1338 |
| AF245004.1  | -----                                                        | 1390 |
| JF412263.1  | --CTTCTCAACTCGGCG-----                                       | 1434 |
| MN309752.1  | --CTTCTCAACTCGGCG-----                                       | 1434 |
| KM588181.1  | --CTTCTCAACTCTGC-----                                        | 1430 |
| FJ789784.1  | --CTTCTCAACTCGGC-----                                        | 1433 |
| AF245003.1  | -----                                                        | 1390 |
| NC_008041.1 | --CTTCTCAACTCGGCG-----                                       | 1434 |
| AY744705.1  | --CTTCTCAACTGTGGTT-----                                      | 1435 |
|             |                                                              |      |
| KY354702.2  | -----                                                        | 1396 |
| KF386164.1  | -----                                                        | 1434 |
| JX402858.1  | -----                                                        | 1333 |
| KY315689.1  | AACTGACTGTGCTTAATTGGGTGCCAGTGGTACCAGTCGTATCCACCGTGCCAAGGCACA | 1546 |
| JN189992.2  | -----                                                        | 1433 |
| GU592791.1  | -----                                                        | 1404 |
| AF499774.1  | -----                                                        | 1367 |
| MG637439.1  | -----                                                        | 1432 |
| KU705815.1  | -----                                                        | 1338 |
| AF245004.1  | -----                                                        | 1390 |
| JF412263.1  | -----                                                        | 1434 |
| MN309752.1  | -----                                                        | 1434 |
| KM588181.1  | -----                                                        | 1430 |
| FJ789784.1  | -----                                                        | 1433 |
| AF245003.1  | -----                                                        | 1390 |
| NC_008041.1 | -----                                                        | 1434 |
| AY744705.1  | -----                                                        | 1435 |
|             |                                                              |      |
| KY354702.2  | -----                                                        | 1396 |
| KF386164.1  | -----                                                        | 1434 |
| JX402858.1  | -----                                                        | 1333 |
| KY315689.1  | CACCAGCCGAAATCGCTGACGCAGTGCAAACTTGGCCATGCCAAGGCACACACCAGCCG  | 1606 |
| JN189992.2  | -----                                                        | 1433 |
| GU592791.1  | -----                                                        | 1404 |
| AF499774.1  | -----                                                        | 1367 |
| MG637439.1  | -----                                                        | 1432 |
| KU705815.1  | -----                                                        | 1338 |
| AF245004.1  | -----                                                        | 1390 |
| JF412263.1  | -----                                                        | 1434 |
| MN309752.1  | -----                                                        | 1434 |
| KM588181.1  | -----                                                        | 1430 |
| FJ789784.1  | -----                                                        | 1433 |
| AF245003.1  | -----                                                        | 1390 |
| NC_008041.1 | -----                                                        | 1434 |
| AY744705.1  | -----                                                        | 1435 |
|             |                                                              |      |
| KY354702.2  | -----                                                        | 1396 |
| KF386164.1  | -----                                                        | 1434 |
| JX402858.1  | -----                                                        | 1333 |
| KY315689.1  | AAATCGCTGACGCAGTGCAAACTTGGCCGCAACCGAGGAGTCCCTCTTTGGGCTGTTGG  | 1666 |
| JN189992.2  | -----                                                        | 1433 |
| GU592791.1  | -----                                                        | 1404 |
| AF499774.1  | -----                                                        | 1367 |
| MG637439.1  | -----                                                        | 1432 |
| KU705815.1  | -----                                                        | 1338 |
| AF245004.1  | -----                                                        | 1390 |
| JF412263.1  | -----                                                        | 1434 |
| MN309752.1  | -----                                                        | 1434 |
| KM588181.1  | -----                                                        | 1430 |
| FJ789784.1  | -----                                                        | 1433 |
| AF245003.1  | -----                                                        | 1390 |
| NC_008041.1 | -----                                                        | 1434 |
| AY744705.1  | -----                                                        | 1435 |
|             |                                                              |      |
| KY354702.2  | -----                                                        | 1396 |

|             |                                                             |      |
|-------------|-------------------------------------------------------------|------|
| KF386164.1  | -----                                                       | 1434 |
| JX402858.1  | -----                                                       | 1333 |
| KY315689.1  | ATTACCGTTAGCTCCGCGCAGTGAGCACACCGCCATGTGGTTAAATGGCCACTGATCGC | 1726 |
| JN189992.2  | -----                                                       | 1433 |
| GU592791.1  | -----                                                       | 1404 |
| AF499774.1  | -----                                                       | 1367 |
| MG637439.1  | -----                                                       | 1432 |
| KU705815.1  | -----                                                       | 1338 |
| AF245004.1  | -----                                                       | 1390 |
| JF412263.1  | -----                                                       | 1434 |
| MN309752.1  | -----                                                       | 1434 |
| KM588181.1  | -----                                                       | 1430 |
| FJ789784.1  | -----                                                       | 1433 |
| AF245003.1  | -----                                                       | 1390 |
| NC_008041.1 | -----                                                       | 1434 |
| AY744705.1  | -----                                                       | 1435 |

|             |               |      |
|-------------|---------------|------|
| KY354702.2  | -----         | 1396 |
| KF386164.1  | -----         | 1434 |
| JX402858.1  | -----         | 1333 |
| KY315689.1  | TTTTCTACTCGGC | 1739 |
| JN189992.2  | -----         | 1433 |
| GU592791.1  | -----         | 1404 |
| AF499774.1  | -----         | 1367 |
| MG637439.1  | -----         | 1432 |
| KU705815.1  | -----         | 1338 |
| AF245004.1  | -----         | 1390 |
| JF412263.1  | -----         | 1434 |
| MN309752.1  | -----         | 1434 |
| KM588181.1  | -----         | 1430 |
| FJ789784.1  | -----         | 1433 |
| AF245003.1  | -----         | 1390 |
| NC_008041.1 | -----         | 1434 |
| AY744705.1  | -----         | 1435 |

**Figure S3. Sequences of the RNA1 and RNA2 fragments of the NNV isolate from this study.**

|                                                               |     |
|---------------------------------------------------------------|-----|
| RNA1 fragment amplified in this study                         | bp  |
| GATGAGTTCACCTATGATGGTCAAAGCGTGTTCAAAGAAAGAAGCATACAACGCCCCAAAT | 60  |
| TACCCAGGAACATTTCAACCGTTCCGCACACCCAAAACGTCAAGTTGTCCAGCTACACC   | 120 |
| TACGCTTTCAAAGCCAGTGTTCTCCAGCATGTTCCGTGGTACATGCCAACGCACACCCCA  | 180 |
| GCGGAAATCGCTGACGCAGTGCAAAACTTGGCCGCAAGTTCCTGAGCTGGTTGAAACT    | 240 |
| GACTACAGCAAGTTCGATGGCATTCTTGCGCTTTATGCGTGAGTGCGTCGAATTTGCC    | 300 |
| ATCTATAAGCGCTGGGTTACCTGGACCACTTGCCAGAGTTAACAACCTTATTGGCTAAT   | 360 |
| GAGATCCAAGCAGCTGCTGTTACACGACTGGGCATCAAGTATGATCCTGATTGCAGTCGC  | 420 |
| CTCAGTGGTTCTGCTCTCACGACAGACGGAAACAGCATTGCTAATGCGTTCGTCTCATA   | 480 |
| CTTGCTGGTCGCATGGCTGGCATGGATGATGATGAAGCTTGGTCTTGGATCGGCATTGTC  | 540 |
| TACGGTGATGATGGGCTCCGATCTGGTAATGTTTCAAATGAGCTCCTCACCACACTGCT   | 600 |
| TCTTCCCTCGGCTTTGATTTGAAAATAGTGAATCGCGCGCCACGTGGCTCTCCAGTGACA  | 660 |
| TTTCTGTCTCGAGTATACCTCGATCCTTGGTCCTCACCAGGCTTCCGTGCAGTCGCCATTA | 720 |
| AGAACATTATTGAAATTGCACACCACCTGTGATACCCAGTCAGAGATTGACGACATTG    | 778 |

|                                                               |     |
|---------------------------------------------------------------|-----|
| RNA2 fragment amplified in this study                         | bp  |
| CCAAGGCCCGCGAATCCGCAACCTCGTCGACGTGCTAACAATCGTCGGCGTAGTAATCGC  | 60  |
| ACTGACGCACCTGTGTCCAAGGCCTCGACCGTAACCTGGATTTGGACGTGGGACCAATGAC | 120 |
| GTCCATCTCTCAGGTATGTCGAGAATCTCCAGGCCGTCTCCAGCCGGGACAGGAACA     | 180 |
| GACGGATACGTTGTTGTTGACGCAACCATCGTCCCCGACCTCCTGCCACGACTGGGACAC  | 240 |
| GCTGCTAGAATCTTCCAGCGATACGCTGTTGAAACACTGGAGTTTGAATTCAGCCAATG   | 300 |
| TGCCCCGCAAAACACGGGCGGTGGTTACGTTGCTGGCTTCTGCCTGATCCAACGACAAC   | 360 |
| GATCACACCTTCGACGCACTTCAAGCAACTCGTGGTGCAGTCGTTGCCAAATGGTGGGAA  | 420 |
| AGCAGAACAGTCCGACCGCAGTTCACTCGCACGCTCCTCTGGACCTCGTCGGGAAAGGAG  | 480 |
| CAGCGTCTTACATCACCTGGTCGGCTGATACTCCTGTGTGTCGGCAACAACACTGACGTG  | 540 |
| GTTAACGTGTGCGGTGCTGTGTCGCTGGAGTGTTGCGACTGAGCGTTCCGTCTCTGAAACA | 600 |
| CCTGAAGAGACCACCGCTCCCATCATGACACAAGGTCCCCTGTACAATGATTCCCTCGCT  | 660 |
| GCAACTGACTTCAAGTCCATCCTCCTAGGATCTACAGCACTGGACATTGCTCCTGACGGA  | 720 |
| GCAATCTTCCAGCTGGACCGTCCGTTGTCCATTGACTACAACCTTGAGTTGGAGATGTT   | 780 |
| GACCGTGCCGTCTACTGGCACCTCAAGAAGTTTGCTGGCACCGCTGCCACACCTGCAGGC  | 840 |
| TGGTTTCGCTGGGGCATCTGGGACAACCTCAACAAAACGTTACAGATGGCGTTGCTTAC   | 900 |
| TACTCCGATCAGCAGCCTCGTCAAATCCTGCTGCCTGTTGGCACTGTCTGCACAGGGGT   | 960 |
| TGACTCGGAAAATAACCGGGTCATCC                                    | 987 |

## References

- Okinaka, Y.; Nakai, T. Comparisons among the complete genomes of four betanodavirus genotypes. *Diseases of aquatic organisms* **2008**, *80*, 113-121.
- Iwamoto, T.; Okinaka, Y.; Mise, K.; Mori, K.-I.; Arimoto, M.; Okuno, T.; Nakai, T. Identification of host-specificity determinants in betanodaviruses by using reassortants between striped jack nervous necrosis virus and sevenband grouper nervous necrosis virus. *Journal of virology* **2004**, *78*, 1256-1262.
- Iwamoto, T.; Mise, K.; Mori, K.-I.; Arimoto, M.; Nakai, T.; Okuno, T. Establishment of an infectious rna transcription system for striped jack nervous necrosis virus, the type species of the betanodaviruses. The ddbj accession nos of the sequences reported in this paper are ab056571 and ab056572. *Journal of General Virology* **2001**, *82*, 2653-2662.
- Vendramin, N.; Toffan, A.; Mancin, M.; Cappellozza, E.; Panzarin, V.; Bovo, G.; Cattoli, G.; Capua, I.; Terregino, C. Comparative pathogenicity study of ten different betanodavirus strains in experimentally infected european sea bass, *Dicentrarchus labrax* (L.). *Journal of Fish Diseases* **2014**, *37*, 371-383.
- Panzarin, V.; Fusaro, A.; Monne, I.; Cappellozza, E.; Patarnello, P.; Bovo, G.; Capua, I.; Holmes, E.C.; Cattoli, G. Molecular epidemiology and evolutionary dynamics of betanodavirus in southern europe. *Infection, genetics and evolution* **2012**, *12*, 63-70.
- Chérif, N.; Gagne, N.; Groman, D.; Kibenge, F.; Iwamoto, T.; Yason, C.; Hammami, S. Complete sequencing of tunisian redspotted grouper nervous necrosis virus betanodavirus capsid gene and rna-dependent rna polymerase gene. *Journal of fish diseases* **2010**, *33*, 231-240.
- Tan, C.; Huang, B.; Chang, S.F.; Ngoh, G.H.; Munday, B.; Chen, S.C.; Kwang, J. Determination of the complete nucleotide sequences of rna1 and rna2 from greasy grouper (*epinephelus tauvina*) nervous necrosis virus, singapore strain. The sequences reported in this paper have been deposited in genbank under the accession nos af318942 and af319555. *Journal of General Virology* **2001**, *82*, 647-653.
- Chen, X.; Weng, S.; Chen, S.; Chen, Z.; He, J. Protective immunity of orange-spotted grouper (*epinephelus coioides*) against a nervous necrosis virus isolated from china, and determination of the complete sequences of the virus. *ACTA OCEANOLOGICA SINICA-ENGLISH EDITION* **2007**, *26*, 101.
- Liu, H.; Teng, Y.; Zheng, X.; Wu, Y.; Xie, X.; He, J.; Ye, Y.; Wu, Z. Complete sequence of a viral nervous necrosis virus (nnv) isolated from red-spotted grouper (*epinephelus akaara*) in china. *Archives of virology* **2012**, *157*, 777-782.
- Jia, P.; Jia, K.-T.; Yi, M.-S. Complete genome sequence of a fish nervous necrosis virus isolated from sea perch (*lateolabrax japonicus*) in china. *Genome announcements* **2015**, *3*.
- Qin, Y.; Liu, J.; Liu, W.; Shi, H.; Jia, A.; Lu, Y.; Liu, X. First isolation and identification of red-grouper nervous necrosis virus (rgnnv) from adult hybrid hulong grouper (*epinephelus fuscoguttatus* × *epinephelus lanceolatus*) in china. *Aquaculture* **2020**, *529*, 735662.
- Xing, J.; Zhang, Z.; Sheng, X.; Tang, X.; Chi, H.; Zhan, W. Identification and characterization of a new strain of nervous necrosis virus isolated from pearl gentian grouper (*epinephelus lanceolatus* × *epinephelus fuscoguttatus*) in china. *Aquaculture* **2020**, *529*, 735663.
- Sommerset, I.; Nerland, A.H. Complete sequence of rna1 and subgenomic rna3 of atlantic halibut nodavirus (ahnv). *Diseases of aquatic organisms* **2004**, *58*, 117-125.
- Chien, M.-H.; Vo, T.T.M.; Wu, S.-Y.; Lin, C.-H. Complete genome sequence of nervous necrosis virus isolated from orange-spotted grouper (*epinephelus coioides*) in taiwan. *Genome announcements* **2017**, *5*.
- Toffan, A.; Pascoli, F.; Pretto, T.; Panzarin, V.; Abbadi, M.; Buratin, A.; Quartesan, R.; Gijón, D.; Padrós, F. Viral nervous necrosis in gilthead sea bream (*sparus aurata*) caused by reassortant betanodavirus rgnnv/sjnnv: An emerging threat for mediterranean aquaculture. *Scientific reports* **2017**, *7*, 1-12.
- Toffan, A.; De Salvador, M.; Scholz, F.; Pretto, T.; Buratin, A.; Rodger, H.D.; Toson, M.; Cuenca, A.; Vendramin, N. Lumpfish (*cyclopterus lumpus*, linnaeus) is susceptible to viral nervous necrosis: Result of an experimental infection with different genotypes of betanodavirus. *Journal of fish diseases* **2019**, *42*, 1667-1676.
- Huang, J.; Lin, L.; Weng, S.; He, J. High expression of capsid protein of red-spotted grouper nervous necrosis virus in an avian cell line requires viral rna2 non-coding regions. *Journal of fish diseases* **2007**, *30*, 439-444.
- Chen, C.-W.; Wu, M.-S.; Huang, Y.-J.; Cheng, C.-A.; Chang, C.-Y. Recognition of linear b-cell epitope of betanodavirus coat protein by rg-m18 neutralizing mab inhibits giant grouper nervous necrosis virus (ggnnv) infection. *PLoS One* **2015**, *10*, e0126121.
- Toffan, A.; Biasini, L.; Pretto, T.; Abbadi, M.; Buratin, A.; Franch, R.; Dalla Rovere, G.; Panzarin, V.; Marsella, A.; Bargelloni, L. Age dependency of rgnnv/sjnnv viral encephalo-retinopathy in gilthead sea bream (*sparus aurata*). *Aquaculture* **2021**, *539*, 736605.
- Lin, C.-S.; Lu, M.-W.; Tang, L.; Liu, W.; Chao, C.-B.; Lin, C.J.; Krishna, N.K.; Johnson, J.E.; Schneemann, A. Characterization of virus-like particles assembled in a recombinant baculovirus system expressing the capsid protein of a fish nodavirus. *Virology* **2001**, *290*, 50-58.
- Mao, M.-G.; Wen, S.-H.; Perálvarez-Marín, A.; Li, H.; Jiang, J.-L.; Jiang, Z.-Q.; Li, X.; Sun, H.; Lü, H.-Q. Evidence for and characterization of nervous necrosis virus infection in pacific cod (*gadus macrocephalus*). *Archives of virology* **2015**, *160*, 2237-2248.
- Hegde, A.; Teh, H.; Lam, T.; Sin, Y. Nodavirus infection in freshwater ornamental fish, guppy, *poecilia reticulata*—comparative characterization and pathogenicity studies. *Archives of virology* **2003**, *148*, 575-586.
- Knibb, W.; Luu, G.; Premachandra, H.; Lu, M.-W.; Nguyen, N.H. Regional genetic diversity for nnv grouper viruses across the indo-asian region—implications for selecting virus resistance in farmed groupers. *Scientific reports* **2017**, *7*, 1-11.
- Keawcharoen, J.; Techangamsuwan, S.; Ponpornpisit, A.; Lombardini, E.; Patchimasiri, T.; Pirarat, N. Genetic characterization of a betanodavirus isolated from a clinical disease outbreak in farm-raised tilapia *oreochromis niloticus* (L.) in thailand. *Journal of Fish Diseases* **2015**, *38*, 49-54.
